# Supplementary material for: One-pot four component domino strategy for the synthesis of novel spirooxindole pyrrolizine linked 1,2,3-triazoles via stereo- and regioselective [3 + 2] cycloaddition reaction in acidic medium
Source: Royal Society of Chemistry journal article supplement (doi:10.1039/c5ra26093k), 2016-01-01
Supplement: c5ra26093k1.pdf [file c5ra26093k1.pdf]

**One-pot four component domino strategy for the synthesis of novel spirooxindole pyrrolizine linked 1,2,3-triazoles *via* stereo- and regioselective [3+2] cycloaddition reaction in acidic Medium.**

**Rajeswari M., Sudesh Kumari and Jitender M. Khurana\***

Department of Chemistry, University of Delhi, New Delhi - 110 007, India.  
Corresponding author: Fax: +91 11 27666605; Tel: +91 11 27667725.  
Email: [jmkhurana1@yahoo.co.in](mailto:jmkhurana1@yahoo.co.in)

**Table of contents**

|                                                                                           |                   |
|-------------------------------------------------------------------------------------------|-------------------|
| <b>Spectral data.....</b>                                                                 | <b>Page 2-17</b>  |
| <b>Copies of <sup>1</sup>H NMR, <sup>13</sup>C NMR and Mass spectra of compounds.....</b> | <b>Page 18-53</b> |
| <b>Crystal Refinement data and inter and intra molecular hydrogen bonding.....</b>        | <b>Page 54-56</b> |

## Supplementary data

### 1'-((1-(4-fluorophenyl)-1*H*-1,2,3-triazol-4-yl)methyl)-6b,7,8,9-tetrahydro-6*H*-spiro[chromeno[3,4-*a*]pyrrolizine-11,3'-indoline]-2',6(6*aH*,11*aH*)-dione (5a)

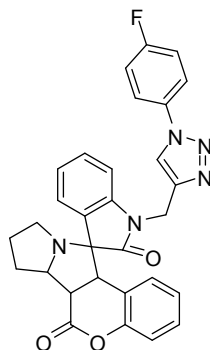

White solid; Yield = 89%; M.p.= 190-192; IR (CHCl<sub>3</sub>)  $\nu/\text{cm}^{-1}$  = 2965, 1756, 1516, 1461, 1227, 752; <sup>1</sup>H NMR (400MHz, DMSO-*d*<sub>6</sub>)  $\delta_{\text{H}}$  = 7.76 (d, 1H, *J* = 6.87 Hz, Ar-H), 7.73-7.69 (m, 2H, Ar-H), 7.48 (s, 1H, Triazole), 7.42-7.34 (m, 3H, Ar-H), 7.17-7.13 (t, 1H, Ar-H), 7.05 (d, 1H, *J* = 7.63 Hz, Ar-H), 6.78 (d, 1H, *J* = 8.39, Ar-H), 6.62-6.59 (t, 1H, Ar-H), 6.47-6.44 (t, 1H, Ar-H), 6.05 (d, 1H, *J* = 7.63 Hz, Ar-H), 4.67-4.55 (q, 2H, -CH<sub>2</sub>), 4.40-4.38 (dt, 1H, *J* = 3.41, 8.01 Hz, -CH), 4.14-4.11 (d, 1H, *J* = 11.45 Hz, -CH), 3.38-3.36 (dd, 1H, *J* = 11.45, 3.21, Hz, -CH), 3.17-3.13 (m, 1H, -CH<sub>2</sub>), 2.58-2.55 (m, 1H, -CH<sub>2</sub>), 2.34-2.28 (m, 1H, -CH<sub>2</sub>), 1.86-1.77 (m, 2H, -CH<sub>2</sub>), 1.63-1.57 (m, 1H, -CH<sub>2</sub>); <sup>13</sup>C NMR (100 MHz, DMSO-*d*<sub>6</sub>)  $\delta_{\text{C}}$  = 175.3, 167.5, 161.7, 150.7, 143.2, 142.8, 132.9, 130.0, 128.2, 127.2, 126.6, 125.3, 123.0, 122.8, 122.6, 120.9, 117.4, 116.7, 116.2, 109.5, 76.0, 67.4, 50.3, 46.8, 42.8, 33.9, 32.7, 26.0; LCMS (ESI) *m/z* calcd for C<sub>30</sub>H<sub>24</sub>FN<sub>5</sub>O<sub>3</sub>: 521.1865 [M<sup>+</sup>]; found: 522.1937 [M<sup>+</sup> +H].

### 1'-((1-(4-methoxyphenyl)-1*H*-1,2,3-triazol-4-yl)methyl)-6b,7,8,9-tetrahydro-6*H*-spiro[chromeno[3,4-*a*]pyrrolizine-11,3'-indoline]-2',6(6*aH*,11*aH*)-dione (5b)

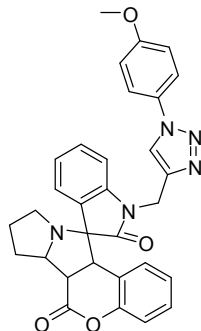

White solid; Yield = 85%; M.p.= 173-175; IR (CHCl<sub>3</sub>)  $\nu/\text{cm}^{-1}$  = 2964, 1757, 1517, 1225, 1041, 754; <sup>1</sup>H NMR (400MHz, DMSO-*d*<sub>6</sub>)  $\delta_{\text{H}}$  = 7.76-7.75 (m, 1H, Ar-H), 7.54-7.53 (m, 2H, Ar-H), 7.37-7.33 (m, 1H, Ar-H), 7.28 (s, 1H, triazole), 7.14-7.12 (m, 2H, Ar-H), 7.08-7.06 (m, 1H, Ar-H), 7.03-7.01 (m, 1H, Ar-H), 6.80-6.78 (m, 1H, Ar-H), 6.63-6.59 (m, 1H, Ar-H), 6.48-6.44 (m, 1H, Ar-H), 6.07-6.05 (m, 1H, Ar-H), 4.66-4.53 (q, 2H, -CH<sub>2</sub>), 4.37 (brs, 1H, -CH), 4.13-4.10 (m, 1H, -CH<sub>2</sub>), 3.77 (s, 3H, -OCH<sub>3</sub>), 3.43-3.31 (m, 1H, -CH<sub>2</sub>), 3.14-3.11 (m, 1H, -CH<sub>2</sub>), 2.55-2.54 (m, 1H, -CH<sub>2</sub>), 2.33-2.27 (m, 1H, -CH<sub>2</sub>), 1.90-1.75 (m, 2H, -CH<sub>2</sub>), 1.62-1.57 (m, 1H, -CH<sub>2</sub>); <sup>13</sup>C NMR (100 MHz, DMSO-*d*<sub>6</sub>)  $\delta_{\text{C}}$  = 175.3, 167.5, 159.3, 150.7, 143.2, 142.6, 130.0, 129.7, 128.3, 127.2, 126.6, 125.3, 123.0, 122.5, 122.1, 120.6, 117.5, 116.2, 114.8, 109.5, 76.0, 67.4, 55.5, 50.4, 46.8, 42.8, 34.0, 32.7, 26.1; LCMS (ESI) *m/z* calcd for C<sub>31</sub>H<sub>27</sub>N<sub>5</sub>O<sub>4</sub> : 533.2065 [M<sup>+</sup>]; found: 534.2146 [M<sup>+</sup> +H].

**1'-((1-(4-nitrophenyl)-1H-1,2,3-triazol-4-yl)methyl)-6b,7,8,9-tetrahydro-6H-spiro[chromeno[3,4-*a*]pyrrolizine-11,3'-indoline]-2',6(6aH,11aH)-dione (5c)**

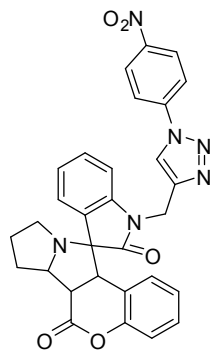

Pale Yellow soli; Yield = 87%; M.p. = 212-214; IR (CHCl<sub>3</sub>)  $\nu/\text{cm}^{-1}$  = 2926, 1755, 1342, 1171, 752; <sup>1</sup>H NMR (400MHz, DMSO-*d*<sub>6</sub>)  $\delta_{\text{H}}$  = 8.40 (d, 2H, *J* = 8.39 Hz, Ar-H), 8.01 (d, 2H, *J* = 9.16, Ar-H), 7.90 (s, 1H, triazole), 7.75 (d, 1H, *J* = 6.87, Ar-H), 7.39-7.36 (t, 1H, Ar-H), 7.17-7.10 (m, 2H, Ar-H), 6.77 (d, 1H, *J* = 7.63, Ar-H), 6.62-6.58 (t, 1H, Ar-H), 6.44-6.41 (t, 1H, Ar-H), 6.01 (d, 1H, *J* = 7.63, Ar-H), 4.68-4.58 (q, 2H, -CH<sub>2</sub>), 4.38 (brs, 1H, -CH), 4.11-4.08 (m, 1H, -CH<sub>2</sub>), 3.43-3.30 (m, 1H, -CH<sub>2</sub>), 3.15-3.11 (m, 1H, -CH<sub>2</sub>), 2.59-2.55 (m, 1H, -CH<sub>2</sub>), 2.33-2.27 (m, 1H, -CH<sub>2</sub>), 1.84-1.73 (m, 2H, -CH<sub>2</sub>), 1.62-1.56 (m, 1H, -CH<sub>2</sub>); <sup>13</sup>C NMR (100 MHz, DMSO-*d*<sub>6</sub>)  $\delta_{\text{C}}$  = 175.2, 167.5, 150.6, 146.7, 143.3, 143.1, 140.5, 130.0, 128.2, 127.1, 126.5, 125.5, 125.3, 122.9, 122.5, 121.2, 120.7, 117.3, 116.1, 109.6, 76.03, 67.5, 50.3, 46.8, 43.0, 33.7, 32.7, 26.0; LCMS (ESI) *m/z* calcd for C<sub>30</sub>H<sub>24</sub>N<sub>6</sub>O<sub>5</sub> : 548.1811 [M<sup>+</sup>]; found: 549.1888 [M<sup>+</sup>+H].

**1'-((1-p-tolyl-1H-1,2,3-triazol-4-yl)methyl)-6b,7,8,9-tetrahydro-6H-spiro[chromeno[3,4-a]pyrrolizine-11,3'-indoline]-2',6(6aH,11aH)-dione (5d)**

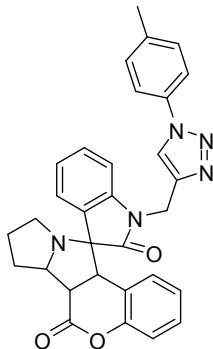

White solid; Yield = 80%; M.p. = 170-173; IR (CHCl<sub>3</sub>)  $\nu/\text{cm}^{-1}$  = 2962, 1754, 1492, 1224, 1170, 751; <sup>1</sup>H NMR (400MHz, DMSO-*d*<sub>6</sub>)  $\delta_{\text{H}}$  = 7.78-7.75 (m, 3H, Ar-H), 7.67-7.65 (m, 2H, Ar-H), 7.62 (s, 1H, triazole), 7.40-7.36 (t, 1H, Ar-H), 7.18-7.15 (t, 1H, Ar-H), 7.08 (d, 1H, *J* = 7.63 Hz, Ar-H), 6.80-6.79 (d, 1H, *J* = 7.63, Ar-H), 6.65-6.61 (t, 1H, Ar-H), 6.49-6.45 (t, 1H, Ar-H), 6.05 (d, 1H, *J* = 7.63 Hz, Ar-H), 4.68-4.57 (q, 2H, -CH<sub>2</sub>), 4.39 (brs, 1H, -CH), 4.15-4.12 (m, 1H, -CH<sub>2</sub>), 3.50-3.38 (m, 1H, -CH<sub>2</sub>), 3.17-3.16 (m, 1H, -CH<sub>2</sub>), 2.60-2.59 (m, 1H, -CH<sub>2</sub>), 2.35-2.29 (m, 1H, -CH<sub>2</sub>), 2.03 (s, 3H, -CH<sub>3</sub>), 1.86-1.80 (m, 2H, -CH<sub>2</sub>), 1.64-1.58 (m, 1H, -CH<sub>2</sub>); <sup>13</sup>C NMR (100 MHz, DMSO-*d*<sub>6</sub>)  $\delta_{\text{C}}$  = 175.2, 167.5, 150.6, 143.2, 142.6, 138.4, 134.0, 130.1, 130.0, 128.2, 127.2, 126.5, 125.3, 123.0, 122.5, 123.0, 122.5, 120.4, 120.2, 117.4, 116.2, 109.5, 76.0, 67.4, 50.3, 46.8, 42.8, 33.9, 32.7, 26.0, 20.5; LCMS (ESI) *m/z* calcd for C<sub>31</sub>H<sub>27</sub>N<sub>5</sub>O<sub>3</sub> : 517.2106 [M<sup>+</sup>]; found: 518.2180 [M<sup>+</sup> +H].

**1'-((1-(7-chloroquinolin-4-yl)-1*H*-1,2,3-triazol-4-yl)methyl)-6b,7,8,9-tetrahydro-6*H*-spiro[chromeno[3,4-*a*]pyrrolizine-11,3'-indoline]-2',6'(6*aH*,11*aH*)-dione (5e)**

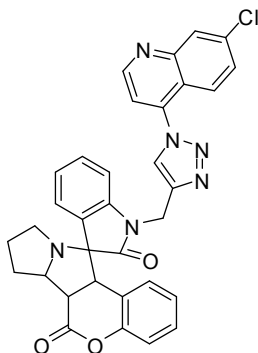

White solid; Yield = 84%; M.p. = 204-206; IR (CHCl<sub>3</sub>)  $\nu$ /cm<sup>-1</sup> = 2963, 1758, 1609, 1225, 1175, 755; <sup>1</sup>H NMR (400MHz, DMSO-*d*<sub>6</sub>)  $\delta$ <sub>H</sub> = 9.16-9.15 (m, 1H, Ar-H), 8.29 (s, 1H, Ar-H), 7.83 (d, 1H, *J* = 7.63 Hz, Ar-H), 7.79 (s, 1H, triazole), 7.67-7.66 (m, 1H, Ar-H), 7.46-7.42 (t, 1H, Ar-H) 7.36 (s, 1H, Ar-H), 7.24-7.20 (t, 1H, Ar-H), 7.12 (d, 1H, *J* = 7.63 Hz, Ar-H), 6.69 (d, 1H, *J* = 8.39, Ar-H), 6.39-6.30 (m, 2H, Ar-H), 6.12 (d, 1H, *J* = 7.63 Hz, Ar-H), 4.84-4.72 (q, 2H, -CH<sub>2</sub>), 4.45-4.41 (m, 1H, -CH), 4.19-4.16 (m, 1H, -CH), 3.41-3.38 (m, 1H, -CH<sub>2</sub>), 3.24-3.17 (m, 1H, -CH<sub>2</sub>), 2.64-2.61 (m, 1H, -CH<sub>2</sub>), 2.39- 2.32 (m, 1H, -CH<sub>2</sub>), 1.91-1.78 (m, 1H, -CH<sub>2</sub>), 1.68-1.62 (m, 1H, -CH<sub>2</sub>); <sup>13</sup>C NMR (100 MHz, DMSO-*d*<sub>6</sub>)  $\delta$ <sub>C</sub> = 175.3, 167.4, 152.3, 150.3, 150.8, 149.4, 143.1, 142.7, 139.9, 135.4, 130.1, 129.0, 128.2, 128.0, 127.2, 126.7, 125.2, 124.2, 122.9, 122.5, 120.1, 117.5, 117.0, 116.2, 109.4, 75.9, 67.4, 50.4, 46.7, 42.6, 33.9, 32.8, 30.5, 26.0; LCMS (ESI) *m/z* calcd for C<sub>33</sub>H<sub>25</sub>ClN<sub>6</sub>O<sub>3</sub>: 588.1671 [M<sup>+</sup>]; found: 589.1746 [M<sup>+</sup> +H].

**1'-((1-(4-bromophenyl)-1H-1,2,3-triazol-4-yl)methyl)-6b,7,8,9-tetrahydro-6H-spiro[chromeno[3,4-*a*]pyrrolizine-11,3'-indoline]-2',6(6aH,11aH)-dione (5f)**

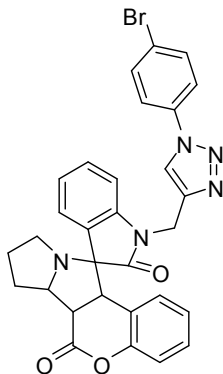

White solid; Yield = 88%; M.p. = 174-176; IR (CHCl<sub>3</sub>)  $\nu/\text{cm}^{-1}$  = 2923, 1753, 1493, 1225, 1172, 753; <sup>1</sup>H NMR (400MHz, DMSO-*d*<sub>6</sub>)  $\delta_{\text{H}}$  = 7.80 (d, 3H, *J* = 8.39, Ar-H), 7.69 (d, 2H, *J* = 9.16, Ar-H), 7.64 (s, 1H, triazole), 7.43-7.39 (t, 1H, Ar-H), 7.22-7.18 (t, 1H, Ar-H), 7.11 (d, 1H, *J* = 8.39 Hz, Ar-H), 6.81-6.79 (m, 1H, Ar-H), 6.69-6.65 (t, 1H, Ar-H), 6.52-6.49 (t, 1H, Ar-H), 6.09 (d, 1H, Ar-H), 4.71-4.60 (q, 2H, -CH<sub>2</sub>), 4.45-4.42 (m, 1H, -CH), 4.16 (d, 1H, *J* = 11.4 Hz, -CH<sub>2</sub>), 3.42-3.38 (m, 1H, Ar-H), 3.23- 3.16 (m, 1H, -CH<sub>2</sub>), 2.63-2.60 (m, 1H, -CH<sub>2</sub>), 2.39-2.32 (m, 1H, -CH<sub>2</sub>), 1.90-1.78 (m, 2H, -CH<sub>2</sub>), 1.70-1.61 (m, 1H, -CH<sub>2</sub>); <sup>13</sup>C NMR (100 MHz, DMSO-*d*<sub>6</sub>)  $\delta_{\text{C}}$  = 175.2, 167.4, 150.6, 143.3, 142.8, 135.5, 132.7, 130.0, 128.1, 127.2, 126.5, 123.0, 122.5, 122.2, 121.4, 120.7, 117.3, 116.1, 109.5, 76.0, 67.4, 50.3, 46.7, 42.9, 33.8, 32.7, 26.0; LCMS (ESI) *m/z* calcd for C<sub>30</sub>H<sub>24</sub> BrN<sub>5</sub>O<sub>3</sub> : 581.1064 [M<sup>+</sup>]; found: 582.1138 [M<sup>+</sup>+H], 584.1123 [M<sup>+</sup> +(H+2)].

**1'-((1-(4-fluorophenyl)-1H-1,2,3-triazol-4-yl)methyl)-3-hydroxy-6b,7,8,9-tetrahydro-6H-spiro[chromeno[3,4-a]pyrrolizine-11,3'-indoline]-2',6(6aH,11aH)-dione (5g)**

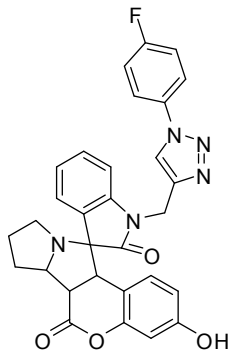

White solid; Yield = 85%; M.p. = 172-174; IR (CHCl<sub>3</sub>)  $\nu/\text{cm}^{-1}$  = 2924, 1715, 1514, 1231, 1163, 755; <sup>1</sup>H NMR (400MHz, DMSO-*d*<sub>6</sub>)  $\delta_{\text{H}}$  = 9.48 (s, 1H, -OH), 7.82 (s, 1H, triazole), 7.78-7.73 (m, 3H, Ar-H), 7.41-7.37 (m, 3H, Ar-H), 7.19-7.16 (t, 1H, Ar-H), 7.06 (d, 1H, *J* = 7.63 Hz, Ar-H), 6.29 (s, 1H, Ar-H), 6.08 (d, 1H, *J* = 7.63 Hz, Ar-H), 6.00 (d, 1H, *J* = 8.39 Hz, Ar-H), 4.68 (s, 2H, -CH<sub>2</sub>), 4.39 (m, 1H, -CH), 4.08-4.05 (m, 1H, -CH<sub>2</sub>), 3.49-3.36 (m, 1H, -CH<sub>2</sub>), 3.17 (brs, 1H, -CH<sub>2</sub>), 2.59-2.56 (m, 1H, -CH<sub>2</sub>), 2.34-2.30 (m, 1H, -CH<sub>2</sub>), 1.86-1.76 (m, 2H, -CH<sub>2</sub>), 1.65-1.61 (m, 1H, -CH<sub>2</sub>); <sup>13</sup>C NMR (100 MHz, DMSO-*d*<sub>6</sub>)  $\delta_{\text{C}}$  = 175.5, 167.8, 162.9, 160.4, 157.6, 151.5, 143.4, 142.9, 132.8, 129.9, 128.0, 126.5, 125.5, 122.6, 122.5, 120.9, 116.8, 116.6, 110.9, 109.4, 107.3, 102.8, 75.6, 67.0, 50.3, 47.0, 42.2, 34.0, 32.8, 26.1; LCMS (ESI) *m/z* calcd for C<sub>30</sub>H<sub>24</sub>FN<sub>5</sub>O<sub>4</sub>: 537.1809 [M<sup>+</sup>]; found: 538.1884 [M<sup>+</sup> +H].

**1'-((1-(4-bromophenyl)-1H-1,2,3-triazol-4-yl)methyl)-3-hydroxy-6b,7,8,9-tetrahydro-6H-spiro[chromeno[3,4-a]pyrrolizine-11,3'-indoline]-2',6(6aH,11aH)-dione (5h)**

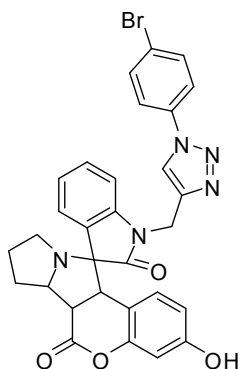



White solid; Yield = 83%; M.p. = 174-177; IR (CHCl<sub>3</sub>)  $\nu/\text{cm}^{-1}$  = 2924, 1720, 1514, 1231, 1163, 758; <sup>1</sup>H NMR (400MHz, DMSO-*d*<sub>6</sub>)  $\delta_{\text{H}}$  = 9.49 (s, 1H, OH), 7.87 (s, 1H, triazole), 7.76-7.74 (m, 3H, Ar-H), 7.69-7.67 (m, 2H, Ar-H), 7.40-7.36 (t, 1H, Ar-H), 7.19-7.15 (t, 1H, Ar-H), 7.05 (d, 1H, *J* = 8.39 Hz, Ar-H), 6.29 (s, 1H, Ar-H), 6.08 (d, 1H, *J* = 6.10 Hz, Ar-H), 5.99 (d, 1H, *J* = 8.01 Hz, Ar-H), 4.68 (s, 2H, -CH<sub>2</sub>), 4.38 (brs, 1H, -CH), 4.07-4.04 (m, 1H, -CH), 3.46-3.43 (m, 1H, -CH), 3.16-3.13 (m, 1H, -CH<sub>2</sub>), 2.58-2.55 (m, 1H, -CH<sub>2</sub>), 2.36-2.30 (m, 1H, -CH<sub>2</sub>), 1.92-1.75 (m, 2H, -CH<sub>2</sub>), 1.67-1.55 (m, 1H, -CH<sub>2</sub>); <sup>13</sup>C NMR (100 MHz, DMSO-*d*<sub>6</sub>)  $\delta_{\text{C}}$  = 175.4, 167.7, 157.5, 151.4, 143.3, 143.1, 135.6, 132.7, 129.9, 127.9, 126.5, 125.5, 122.4, 122.0, 121.3, 120.6, 110.8, 109.5, 107.4, 102.8, 75.67, 67.0, 50.3, 46.9, 42.3, 34.02, 32.8, 26.1; LCMS (ESI) *m/z* calcd for C<sub>30</sub>H<sub>24</sub> BrN<sub>5</sub>O<sub>4</sub> : 597.1003 [M<sup>+</sup>]; found: 598.1076 [M<sup>+</sup> +H]; 600.1063 [M<sup>+</sup>+(H+2)].

**3-hydroxy-1'-((1-(4-nitrophenyl)-1*H*-1,2,3-triazol-4-yl)methyl)-6b,7,8,9-tetrahydro-6*H*-spiro[chromeno[3,4-*a*]pyrrolizine-11,3'-indoline]-2',6(6*aH*,11*aH*)-dione (5i)**

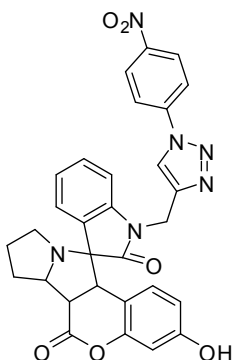

Pale yellow solid; Yield = 86%; M.p. = 182-184; IR (CHCl<sub>3</sub>)  $\nu/\text{cm}^{-1}$  = 2920, 1711, 1521, 1346, 1170, 752; <sup>1</sup>H NMR (400MHz, DMSO-*d*<sub>6</sub>)  $\delta_{\text{H}}$  = 9.38 (s, 1H, -OH), 8.40 (d, 1H, *J* = 8.39 Hz, Ar-H), 8.06-8.05 (m, 1H, Ar-H), 8.02 (s, 1H, triazole), 7.77 (d, 1H, *J* = 7.35, Ar-H), 7.42-7.38 (t, 1H, Ar-H), 7.20-7.16 (t, 1H, Ar-H), 7.10 (d, 1H, *J* = 7.63 Hz, Ar-H), 6.25 (s, 1H, Ar-H), 6.04-

6.02 (m, 1H, Ar-H), 5.95-5.93 (m, 1H, Ar-H), 4.71 (s, 2H, -CH<sub>2</sub>), 4.39 (brs, 1H, -CH), 4.06-4.03 (m, 1H, -CH), 3.49-3.40 (m, 1H, -CH<sub>2</sub>), 3.17-3.18 (m, 1H, -CH<sub>2</sub>), 2.58-2.52 (m, 1H, -CH<sub>2</sub>), 2.34-2.32 (m, 1H, -CH<sub>2</sub>), 1.87-1.78 (m, 2H, -CH<sub>2</sub>), 1.65-1.61 (m, 1H, -CH<sub>2</sub>); <sup>13</sup>C NMR (100 MHz, DMSO-*d*<sub>6</sub>) δ<sub>C</sub> = 175.5, 167.7, 157.5, 151.4, 146.6, 143.5, 143.2, 140.5, 129.9, 127.9, 126.5, 125.5, 122.5, 121.1, 120.7, 110.7, 109.4, 107.3, 102.7, 75.6, 67.1, 50.3, 46.9, 42.3, 33.9, 32.8, 30.7, 26.1; LCMS (ESI) *m/z* calcd for C<sub>30</sub>H<sub>24</sub>N<sub>6</sub>O<sub>6</sub> : 564.1752 [M<sup>+</sup>]; found: 565.1825 [M<sup>+</sup> +H].

**3-hydroxy-1'-((1-p-tolyl-1*H*-1,2,3-triazol-4-yl)methyl)-6b,7,8,9-tetrahydro-6*H*-spiro[chromeno[3,4-*a*]pyrrolizine-11,3'-indoline]-2',6(6*aH*,11*aH*)-dione (5j)**

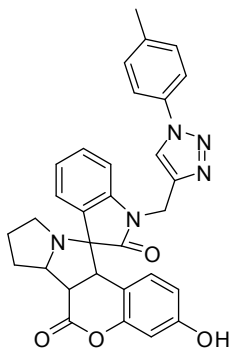

White solid; Yield = 81%; M.p. = 173-175; IR (CHCl<sub>3</sub>) ν/cm<sup>-1</sup> = 2924, 1713, 1515, 1166, 755; <sup>1</sup>H NMR (400MHz, DMSO-*d*<sub>6</sub>) δ<sub>H</sub> = 9.57 (s, 1H, -OH), 7.82 (s, 1H, triazole), 7.78 (d, 1H, *J* = 6.87 Hz, Ar-H), 7.58 (d, 1H, *J* = 8.39 Hz, Ar-H), 7.39-7.34 (m, 3H, Ar-H), 7.19-7.15 (t, 1H, Ar-H), 7.04 (d, 1H, *J* = 7.63 Hz, Ar-H), 6.33-6.31 (m, 1H, Ar-H), 6.14-6.11 (m, 1H, Ar-H), 6.04-6.02 (m, 1H, Ar-H), 4.71-4.63 (m, 2H, -CH<sub>2</sub>), 4.41-4.36 (m, 1H, -CH), 4.09-4.06 (m, 1H, -CH), 3.33-3.32 (m, 1H, Ar-H), 3.19-3.13 (m, 1H, -CH<sub>2</sub>), 2.57-2.54 (m, 1H, -CH<sub>2</sub>), 2.35 (s, 3H, -CH<sub>3</sub>), 2.32-2.30 (m, 1H, -CH<sub>2</sub>), 1.87-1.75 (m, 2H, -CH<sub>2</sub>), 1.67-1.56 (m, 1H, -CH<sub>2</sub>); <sup>13</sup>C NMR (100 MHz, DMSO-*d*<sub>6</sub>) δ<sub>C</sub> = 175.5, 167.7, 157.6, 151.5, 143.4, 142.8, 138.3, 134.0, 130.2.

129.9, 128.0, 126.5, 125.5, 122.4, 120.5, 119.9, 110.9, 109.4, 107.4, 102.9, 75.6, 67.0, 50.3, 47.0, 42.1, 34.1, 32.8, 30.7, 26.1, 20.6; LCMS (ESI)  $m/z$  calcd for  $C_{31}H_{27}N_5O_4$  : 533.2053  $[M^+]$ ; found: 534.2127  $[M^+ + H]$ .

**1'-((1-(4-chlorophenyl)-1*H*-1,2,3-triazol-4-yl)methyl)-3-hydroxy-6b,7,8,9-tetrahydro-6*H*-spiro[chromeno[3,4-*a*]pyrrolizine-11,3'-indoline]-2',6(6*aH*,11*aH*)-dione (5k)**

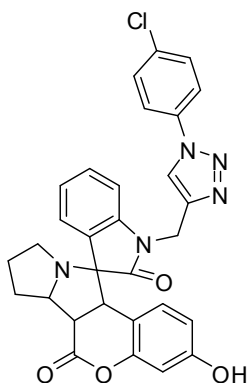

White solid; Yield = 87%; M.p. = 175-177; IR ( $CHCl_3$ )  $\nu/cm^{-1}$  = 2923, 1712, 1498, 1169, 752;  $^1H$  NMR (400MHz,  $DMSO-d_6$ )  $\delta_H$  = 9.48 (s, 1H, -OH), 7.87 (s, 1H, triazole), 7.78-7.74 (m, 3H, Ar-H), 7.62 (d, 1H,  $J$  = 8.77 Hz, Ar-H), 7.40-7.36 (t, 1H, Ar-H), 7.19-7.16 (t, 1H, Ar-H), 7.06 (d, 1H,  $J$  = 7.63 Hz, Ar-H), 6.32-6.26 (m, 1H, Ar-H), 6.09-6.07 (m, 1H, Ar-H), 5.99 (d, 1H,  $J$  = 8.39 Hz, Ar-H), 4.68 (s, 2H,  $-CH_2$ ), 4.41-4.37 (m, 1H, -CH), 4.07-4.05 (d, 1H,  $J$  = 11.4 Hz, -CH), 3.30-3.29 (m, 1H,  $-CH_2$ ), 3.19-3.13 (m, 1H,  $-CH_2$ ), 2.58-2.55 (m, 1H,  $-CH_2$ ), 2.36-2.30 (m, 1H,  $-CH_2$ ), 1.88-1.76 (m, 2H,  $-CH_2$ ), 1.68-1.59 (m, 1H,  $-CH_2$ );  $^{13}C$  NMR (100 MHz,  $DMSO-d_6$ )  $\delta_C$  = 175.5, 167.7, 157.5, 151.4, 143.3, 143.0, 135.0, 132.9, 129.8, 127.9, 126.5, 125.5, 122.4, 121.8, 120.7, 110.8, 109.4, 107.3, 102.8, 75.6, 67.0, 50.3, 46.9, 42.2, 34.0, 32.7, 26.1; LCMS (ESI)  $m/z$  calcd for  $C_{30}H_{24}ClN_5O_4$  : 553.1514  $[M^+]$ ; found: 554.1587  $[M^+ + H]$ .

**1'-((1-(7-chloroquinolin-4-yl)-1*H*-1,2,3-triazol-4-yl)methyl)-3-hydroxy-6b,7,8,9-tetrahydro-6*H*-spiro[chromeno[3,4-*a*]pyrrolizine-11,3'-indoline]-2',6(6*aH*,11*aH*)-dione (5l)**

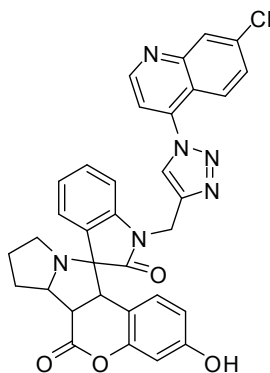

White solid; Yield = 84%; M.p. = 185-187; IR (CHCl<sub>3</sub>)  $\nu$ /cm<sup>-1</sup> = 2931, 1712, 1609, 1462, 1160, 753; <sup>1</sup>H NMR (400MHz, DMSO-*d*<sub>6</sub>)  $\delta$ <sub>H</sub> = 9.19 (s, 1H, -OH), 9.10-9.09 (m, 1H, Ar-H), 8.25 (s, 1H, triazole), 7.80-7.78 (m, 2H, Ar-H), 7.74-7.71 (m, 1H, Ar-H), 7.62-7.61 (m, 1H, Ar-H), 7.53 (s, 1H, Ar-H), 7.43-7.39 (t, 1H, Ar-H), 7.22-7.18 (t, 1H, Ar-H), 7.09 (d, 1H, *J* = 7.63 Hz, Ar-H), 6.17 (s, 1H, Ar-H), 5.97-5.88 (m, 2H, Ar-H), 4.86-4.75 (q, 2H, -CH<sub>2</sub>), 4.47-4.33 (m, 1H, -CH), 4.06 (d, 1H, *J* = 11.4 Hz, -CH), 3.53-3.43 (m, 1H, -CH<sub>2</sub>), 3.18-3.15 (m, 1H, -CH<sub>2</sub>), 2.61-2.57 (m, 1H, -CH<sub>2</sub>), 2.37-2.30 (m, 1H, -CH<sub>2</sub>), 1.87-1.76 (m, 2H, -CH<sub>2</sub>), 1.65-1.57 (m, 1H, -CH<sub>2</sub>); <sup>13</sup>C NMR (100 MHz, DMSO-*d*<sub>6</sub>)  $\delta$ <sub>C</sub> = 175.6, 167.8, 157.4, 152.4, 151.4, 149.3, 143.3, 142.8, 139.9, 135.2, 129.9, 128.8, 128.1, 127.9, 126.5, 125.4, 125.2, 124.4, 122.5, 120.3, 116.9, 110.9, 109.4, 107.3, 102.6, 75.6, 67.0, 50.4, 46.8, 42.3, 34.2, 32.8, 30.7, 26.1; LCMS (ESI) *m/z* calcd for C<sub>33</sub>H<sub>25</sub>ClN<sub>6</sub>O<sub>4</sub>: 604.1626 [M<sup>+</sup>]; found: 605.1700 [M<sup>+</sup> +H].

**2-bromo-1'-((1-(4-chlorophenyl)-1*H*-1,2,3-triazol-4-yl)methyl)-6b,7,8,9-tetrahydro-6*H*-spiro[chromeno[3,4-*a*]pyrrolizine-11,3'-indoline]-2',6(6*aH*,11*aH*)-dione (5m)**

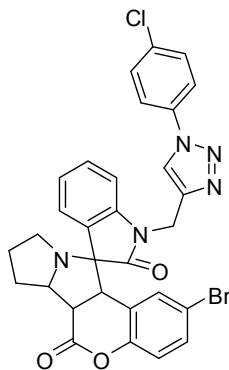

White solid; Yield = 88%; M.p. = 215-216; IR (CHCl<sub>3</sub>)  $\nu/\text{cm}^{-1}$  = 2931, 1760, 1475, 1167, 748; <sup>1</sup>H NMR (400MHz, DMSO-*d*<sub>6</sub>)  $\delta_{\text{H}}$  = 7.83 (s, 1H, triazole), 7.80-7.77 (m, 2H, Ar-H), 7.65 (d, 1H, *J* = 8.39 Hz, Ar-H), 7.47-7.43 (t, 1H, Ar-H), 7.23-7.18 (m, 2H, Ar-H), 6.83-6.81 (m, 1H, Ar-H), 6.78-6.76 (m, 1H, Ar-H), 6.60 (s, 1H, Ar-H), 4.75-4.59 (q, 2H, -CH<sub>2</sub>), 4.43 (brs, 1H, -CH), 4.14 (d, 1H, *J* = 11.4 Hz, -CH), 3.41-3.38 (m, 1H, -CH<sub>2</sub>), 3.17-3.13 (m, 1H, -CH<sub>2</sub>), 2.66-2.62 (m, 1H, -CH<sub>2</sub>), 2.39-2.32 (m, 1H, -CH<sub>2</sub>), 1.88-1.77 (m, 2H, -CH<sub>2</sub>), 1.67-1.63 (m, 1H, -CH<sub>2</sub>); <sup>13</sup>C NMR (100 MHz, DMSO-*d*<sub>6</sub>)  $\delta_{\text{C}}$  = 175.0, 167.0, 149.8, 143.1, 142.6, 135.1, 132.9, 130.7, 130.1, 129.7, 129.4, 126.5, 124.9, 122.6, 121.8, 120.8, 119.9, 118.3, 114.4, 109.7, 76.1, 67.6, 50.3, 46.3, 42.8, 33.7, 32.6, 26.0; LCMS (ESI) *m/z* calcd for C<sub>30</sub>H<sub>23</sub> BrClN<sub>5</sub>O<sub>3</sub> : 615.0680 [M<sup>+</sup>]; found: 616.0754 [M<sup>+</sup> +H]; 618.0737 [M<sup>+</sup>+(H+2)].

**2-bromo-1'-((1-(4-bromophenyl)-1H-1,2,3-triazol-4-yl)methyl)-6b,7,8,9-tetrahydro-6H-spiro[chromeno[3,4-*a*]pyrrolizine-11,3'-indoline]-2',6(6aH,11aH)-dione (5n)**

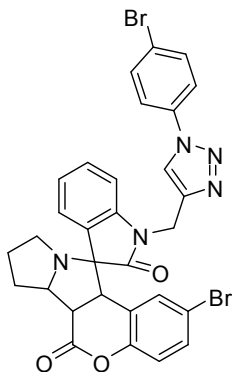

White solid; Yield = 85%; M.p. = 177-179; IR (CHCl<sub>3</sub>)  $\nu$ /cm<sup>-1</sup> = 2928, 1758, 1610, 1489, 1223, 748; <sup>1</sup>H NMR (400MHz, DMSO-*d*<sub>6</sub>)  $\delta$ <sub>H</sub> = 7.85 (s, 1H, triazole), 7.81-7.74 (m, 6H, Ar-H), 7.45-7.43 (t, 1H, ArH), 7.24-7.18 (m, 2H, Ar-H), 6.84-6.79 (m, 2H, Ar-H), 6.06 (s, 1H, Ar-H), 4.75-4.59 (q, 2H, -CH<sub>2</sub>), 4.45-4.41 (m, 1H, -CH), 4.15 (d, 1H, *J* = 11.4 Hz, -CH), 3.42-3.41 (m, 1H, -CH<sub>2</sub>), 3.19-3.14 (m, 1H, -CH<sub>2</sub>), 2.66-2.62 (m, 1H, -CH<sub>2</sub>), 2.39-2.34 (m, 1H, -CH<sub>2</sub>), 1.89-1.78 (m, 2H, -CH<sub>2</sub>), 1.70-1.62 (m, 1H, -CH<sub>2</sub>); <sup>13</sup>C NMR (100 MHz, DMSO-*d*<sub>6</sub>)  $\delta$ <sub>C</sub> = 175.0, 167.0, 149.9, 143.1, 142.6, 135.5, 132.7, 130.7, 130.1, 129.4, 126.5, 124.9, 122.6, 122.0, 121.3, 120.8, 119.9, 118.3, 114.5, 109.7, 76.1, 67.6, 50.3, 46.3, 42.9, 33.8, 32.6, 26.0; LCMS (ESI) *m/z* calcd for C<sub>30</sub>H<sub>23</sub>Br<sub>2</sub>N<sub>5</sub>O<sub>3</sub>: 659.0167 [M<sup>+</sup>]; found: 660.0246 [M<sup>+</sup> +H]; 662.0232 [M<sup>++</sup>(H+2)].

**2-bromo-1'-((1-(7-chloroquinolin-4-yl)-1*H*-1,2,3-triazol-4-yl)methyl)-6b,7,8,9-tetrahydro-6*H*-spiro[chromeno[3,4-*a*]pyrrolizine-11,3'-indoline]-2',6(6*aH*,11*aH*)-dione (5o)**

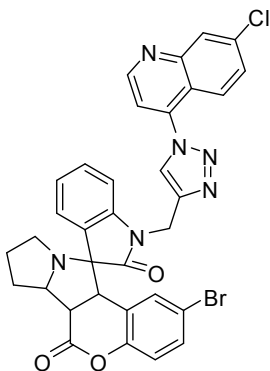

White solid; Yield = 86%; M.p. = 174-176; IR (CHCl<sub>3</sub>)  $\nu$ /cm<sup>-1</sup>= 2969, 1761, 1609, 1476, 1224, 1174, 754; <sup>1</sup>H NMR (400MHz, DMSO-*d*<sub>6</sub>)  $\delta$ <sub>H</sub> = 9.15-9.14 (m, 1H, Ar-H), 8.30-8.28(m, 1H, Ar-H), &.90 (d, 1H, *J* = 9.54 Hz, Ar-H), 7.83 (d, 1H, *J* = 7.63 Hz, Ar-H), 7.80-7.77 (dd, 1H, Ar-H), 7.72-7.71 (m, 1H, Ar-H), 7.59 (s, 1H, triazole), 7.49-7.45 (t, 1H, Ar-H), 7.26-7.22 (t, 1H, Ar-H), 7.16 (d, 1H, *J* = 7.63 Hz, Ar-H), 6.76 (d, 1H, *J* = 8.77 Hz, Ar-H), 6.64-6.62 (dd, 1H, Ar-H), 6.17-6.16 (m, 1H, Ar-H), 4.88-4.73 (q, 2H, -CH<sub>2</sub>), 4.45-4.41 (m, 1H, -CH), 4.20-4.17 (m, 1H, -CH), 3.42-3.40 (m, 1H, -CH<sub>2</sub>), 3.21-3.15 (m, 1H, -CH<sub>2</sub>), 2.66-2.63 (m, 1H, -CH<sub>2</sub>), 2.38-2.33 (m, 1H, -CH<sub>2</sub>), 1.91-1.78 (m, 2H, -CH<sub>2</sub>), 1.71-1.61 (m, 1H, -CH<sub>2</sub>); <sup>13</sup>C NMR (100 MHz, DMSO-*d*<sub>6</sub>)  $\delta$ <sub>C</sub> = 175.1, 166.9, 152.3, 149.9, 149.3, 143.1, 142.6, 139.9, 135.4, 130.8, 130.2, 129.6, 129.0, 128.1, 126.7, 125.4, 124.8, 124.2, 122.7, 120.1, 120.0, 118.5, 116.8, 114.3, 109.5, 76.0, 67.5, 50.2, 46.3, 42.6, 33.9, 32.7, 26.0; LCMS (ESI) *m/z* calcd for C<sub>33</sub>H<sub>24</sub> BrClN<sub>6</sub>O<sub>3</sub> : 666.0775 [M<sup>+</sup>]; found: 667.0840 [M<sup>+</sup> +H]; 669.0842 [M<sup>++</sup>(H+2)].

**2-bromo-1'-((1-(4-methoxyphenyl)-1*H*-1,2,3-triazol-4-yl)methyl)-6b,7,8,9-tetrahydro-6*H*-spiro[chromeno[3,4-*a*]pyrrolizine-11,3'-indoline]-2',6(6*aH*,11*aH*)-dione (5p)**

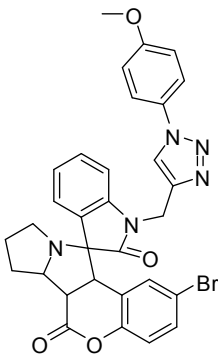

White solid; Yield = 82%; M.p. = 185-187; IR (CHCl<sub>3</sub>)  $\nu$ /cm<sup>-1</sup>= 2966, 1710, 1610, 1516, 1170, 750; <sup>1</sup>H NMR (400MHz, DMSO-*d*<sub>6</sub>)  $\delta$ <sub>H</sub> = 7.79 (d, 1H, *J* = 7.63 Hz, Ar-H), 7.65 (d, 2H, *J* = 8.39 Hz, Ar-H), 7.55 (s, 1H, triazole,) 7.46-7.42 (t, 1H, Ar-H), 7.24-7.20 (t, 1H, Ar-H), 7.16 (d, 1H,

$J = 8.39$  Hz, Ar-H), 7.12 (d, 1H,  $J = 8.39$  Hz, Ar-H), 6.84 (d, 1H,  $J = 8.39$  Hz, Ar-H), 6.80-6.77 (dd, 1H, Ar-H), 6.11-6.10 (m, 1H, Ar-H), 4.75-4.59 (q, 2H, -CH<sub>2</sub>), 4.45-4.41 (m, 1H, -CH), 4.17-4.15 (m, 1H, -CH), 3.82 (s, 3H, -OCH<sub>3</sub>), 3.42-3.38 (dd, 1H, -CH<sub>2</sub>), 3.20-3.14 (m, 1H, -CH<sub>2</sub>), 2.66-2.62 (t, 1H, -CH<sub>2</sub>), 2.39-2.33 (m, 1H, -CH<sub>2</sub>), 1.90-1.78 (m, 2H, -CH<sub>2</sub>), 1.71-1.62 (m, 1H, -CH) <sup>13</sup>C NMR (100 MHz, DMSO-*d*<sub>6</sub>)  $\delta_C = 175.0, 166.9, 159.2, 149.9, 143.2, 142.3, 130.8, 130.1, 129.7, 129.5, 126.5, 124.8, 122.6, 121.9, 120.5, 119.8, 118.3, 114.7, 114.4, 109.6, 76.1, 67.5, 55.5, 50.2, 46.3, 42.7, 33.9, 32.5, 30.6, 25.9$ ; LCMS (ESI)  $m/z$  calcd for C<sub>33</sub>H<sub>24</sub>BrClN<sub>6</sub>O<sub>3</sub>: 611.1161 [M<sup>+</sup>]; found: 612.1236 [M<sup>+</sup> + H]; 614.1219 [M<sup>+</sup> + (H+2)].

**2-methyl-1'-((1-(4-methylphenyl)-1*H*-1,2,3-triazol-4-yl)methyl)-3,3*a*-dihydro-2*H*-spiro[chromeno[3,4-*c*]pyrrole-1,3'-indoline]-2',4(9*bH*)-dione (5q)**

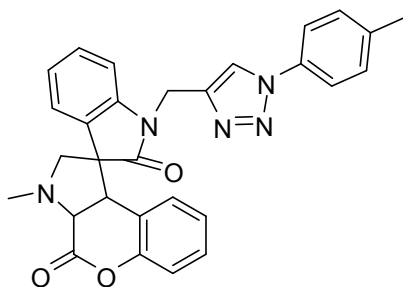

Off-White solid; M.p.: 193-196 °C; Yield 71%; IR (CHCl<sub>3</sub>, cm<sup>-1</sup>)  $\nu_{\max}$ : 3017, 1713, 1213, 739; <sup>1</sup>H NMR (400 MHz, DMSO, *d*<sub>6</sub>)  $\delta_H$ : 8.47 (s, 1H, ArH), 7.69-7.67 (m, 2H, ArH), 7.42-7.41(m, 1H, ArH), 7.37-7.32 (m, 3H, ArH), 7.27-7.25 (m, 2H, ArH), 7.19-7.18 (m, 1H, ArH), 7.18-7.04 (m, 2H, ArH), 7.0-7.08 (m, 1H, ArH), 4.99-4.88 (m, 2H, N-CH<sub>2</sub>), 4.20-4.17 (m, 1H, CH), 4.09- 4.04 (m, 1H, CH), 3.69-3.65 (m, 1H, CH), 3.26-3.22 (m, 1H, CH), 2.34 (s, 3H, CH<sub>3</sub>), 1.91 (s, 3H, CH<sub>3</sub>); <sup>13</sup>C NMR (100 MHz, CDCl<sub>3</sub>) <sup>13</sup>C: 175.2, 166.3, 149.1, 143.1, 138.4, 134.2, 130.2, 128.4, 128.3, 128.0, 124.7, 124.0, 123.0, 122.0, 121.2, 119.8, 116.3, 109.2, 74.5, 72.3, 60.4, 60.1, 49.2, 33.8, 20.5; LCMS (ESI)  $m/z$  calcd. for C<sub>29</sub>H<sub>25</sub>N<sub>5</sub>O<sub>3</sub>: 491.1957, LCMS (ESI) found: 492.2036 [M+H]<sup>+</sup>.



**2-methyl-1'-((1-(4-nitrophenyl)-1*H*-1,2,3-triazol-4-yl)methyl)-3,3*a*-dihydro-2*H*-spiro[chromeno[3,4-*c*]pyrrole-1,3'-indoline]-2',4(9*bH*)-dione (5r).**

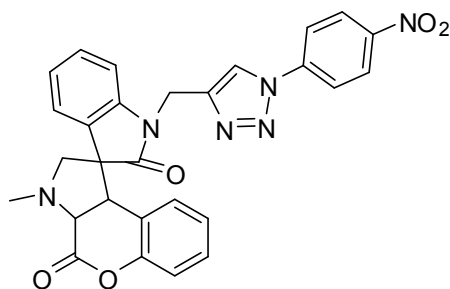

Pale yellow solid; M.p.: 208-210 °C; Yield 78%; IR (CHCl<sub>3</sub>, cm<sup>-1</sup>) v/max: 2925, 1718, 1347, 754; <sup>1</sup>H NMR (400 MHz, DMSO, *d*<sub>6</sub>) δ<sub>H</sub>: 8.79 (s, 1H, ArH), 8.43-8.41 (m, 2H, ArH), 8.15-8.13 (m, 2H, ArH), 7.41-7.27(m, 4H, ArH), 7.17-7.09(m, 4H, ArH), 5.04-4.90(m, 2H, N-CH<sub>2</sub>), 4.20-4.06(m, 2H, CH<sub>2</sub>), 3.75-3.59 (m, 1H, CH), 3.26-3.24 (m, 1H, CH), 1.91 (s, 3H, CH<sub>3</sub>); <sup>13</sup>C NMR (100 MHz, DMS, *d*<sub>6</sub>) <sup>13</sup>C: 175.2, 166.3, 149.1, 146.7, 143.8, 143.0, 140.0, 129.5, 128.4, 128.3, 128.0, 125.6, 124.7, 121.9, 120.5, 109.2, 74.5, 72.3, 60.4, 60.1, 49.2, 33.9; LCMS (ESI) m/z calcd. for C<sub>28</sub>H<sub>22</sub>N<sub>6</sub>O<sub>5</sub>: 352.1652 [M<sup>+</sup>]; found: 523.1734 [M+H]<sup>+</sup>.

**1-((1-(4-fluorophenyl)-1*H*-1,2,3-triazol-4-yl)methyl)indoline-2,3-dione (6a)**

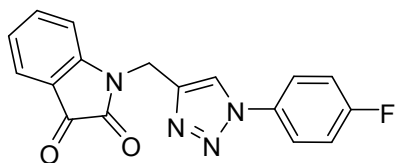

Yellow solid; M.p.: 174-177 °C; Yield 82%; IR (CHCl<sub>3</sub>, cm<sup>-1</sup>) v/max: 2923, 1737, 1611, 1231; <sup>1</sup>H NMR (400 MHz, CDCl<sub>3</sub>) δ<sub>H</sub>: 8.01 (s, 1H, ArH), 7.67-7.56 (m, 4H, ArH), 7.35-7.33 (m, 2H, ArH), 7.18-7.08 (m, 3H, ArH), 5.08 (s, 2H, OCH<sub>2</sub>); <sup>13</sup>C NMR (100 MHz, CDCl<sub>3</sub>) <sup>13</sup>C: 182.9, 150.0, 138.6, 125.4, 124.1, 122.5, 122.4, 117.5, 116.9, 116.7, 111.4, 35.3; LCMS (ESI) m/z calcd. for C<sub>17</sub>H<sub>11</sub>FN<sub>4</sub>O<sub>2</sub>: 322.08, LCMS (ESI) found: 323.0939 [M+H]<sup>+</sup>.

**Figure 1.** <sup>1</sup>H NMR spectrum of compound **5a** (400 MHz, DMSO).

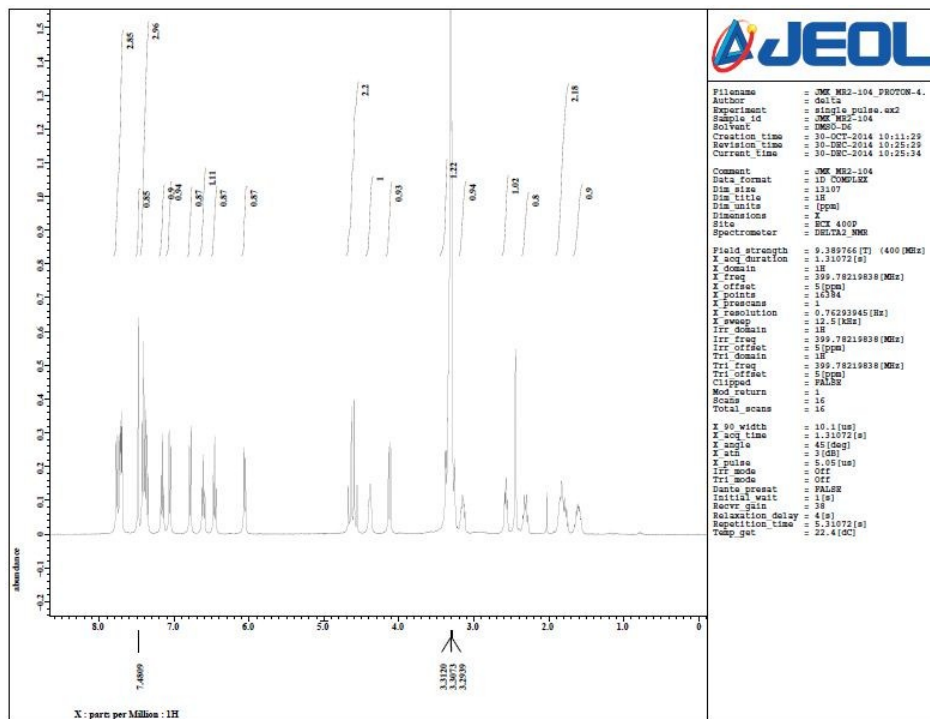

**Figure 2.** <sup>13</sup>C NMR spectrum of compound **5a** (100 MHz, DMSO).

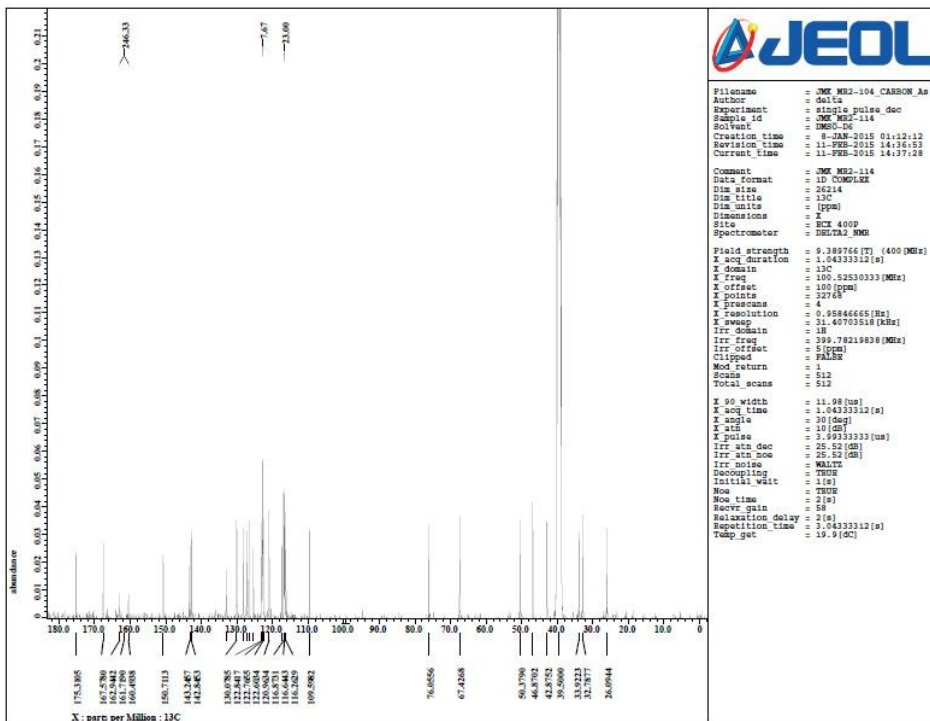

Figure 3. Mass spectrum of compound 5a.

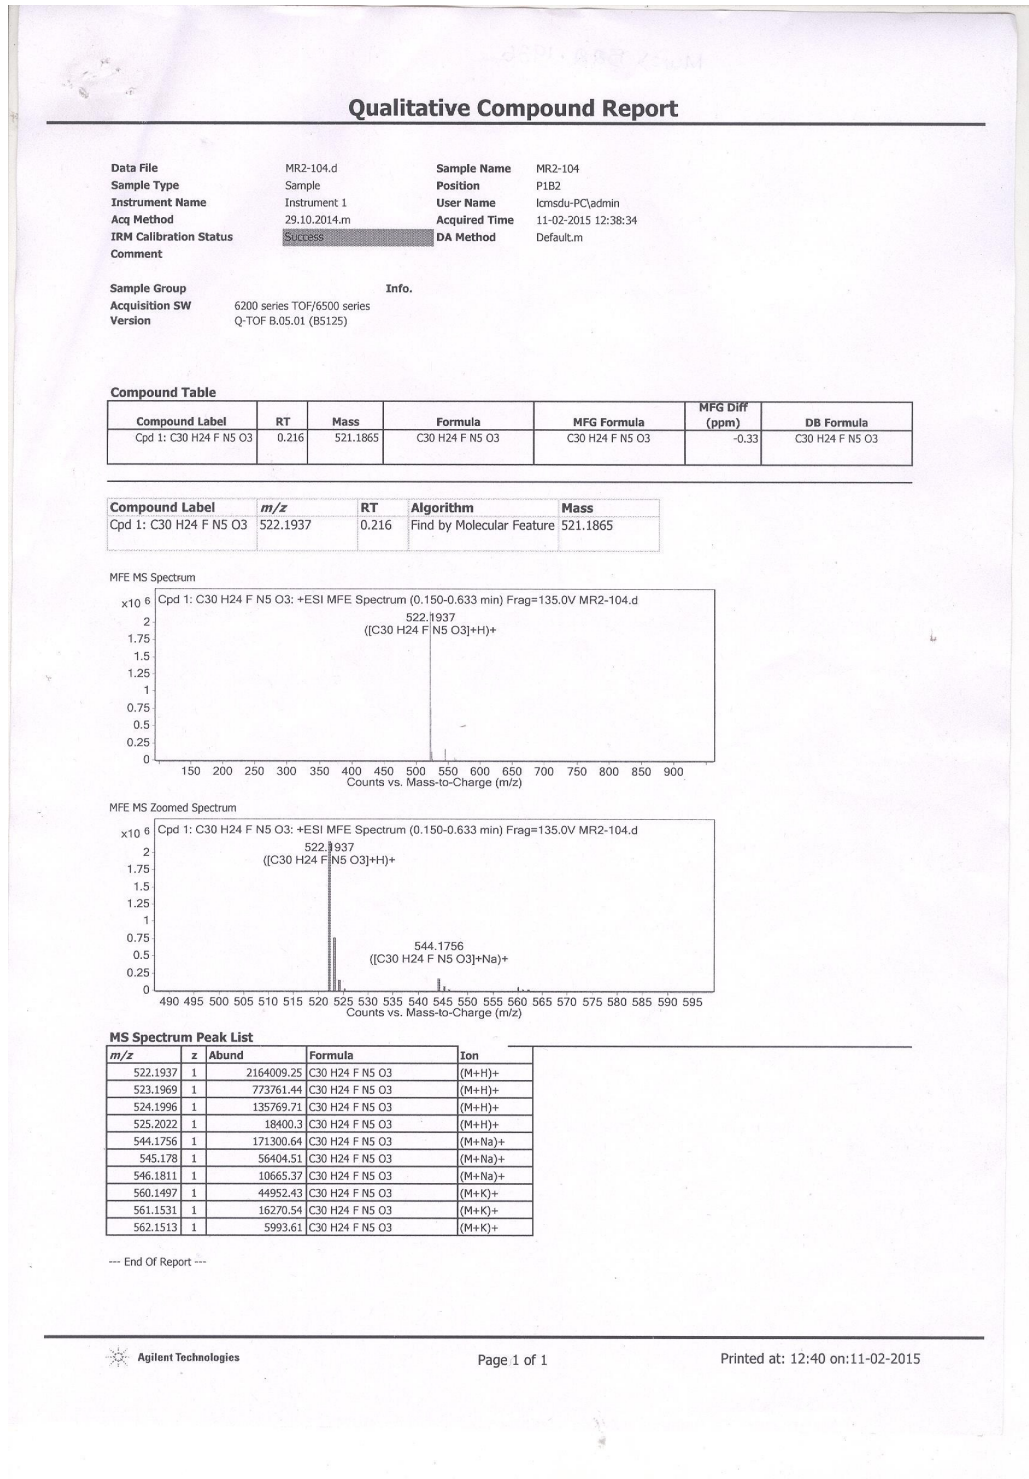

Figure 4.  $^1\text{H}$  NMR spectrum of compound **5b** (400 MHz, DMSO).

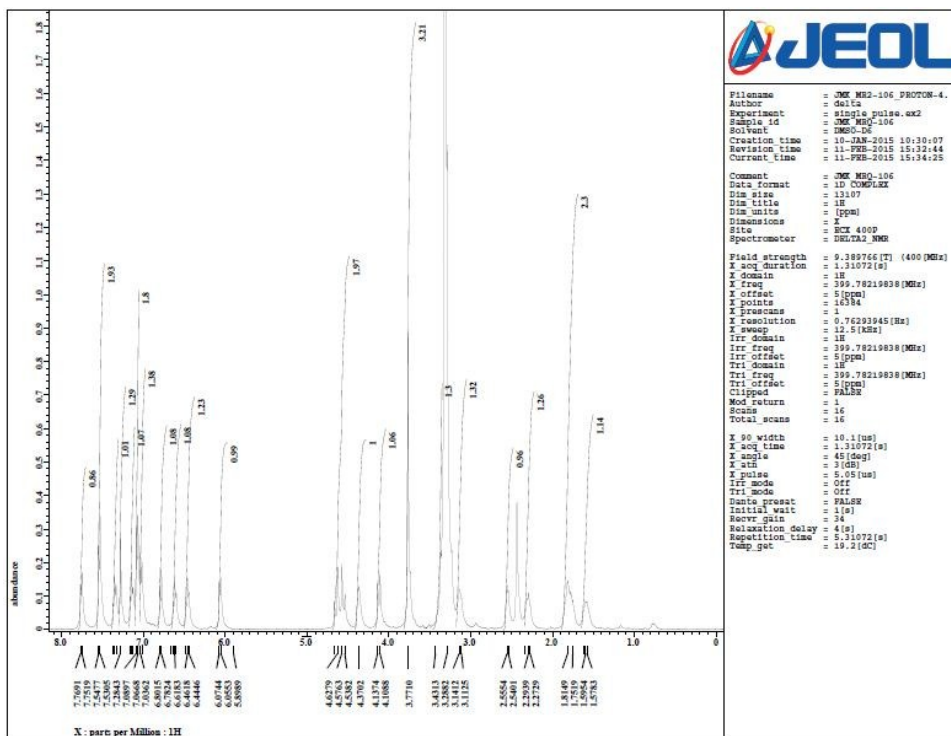

Figure 5.  $^{13}\text{C}$  NMR spectrum of compound **5b** (100 MHz, DMSO).

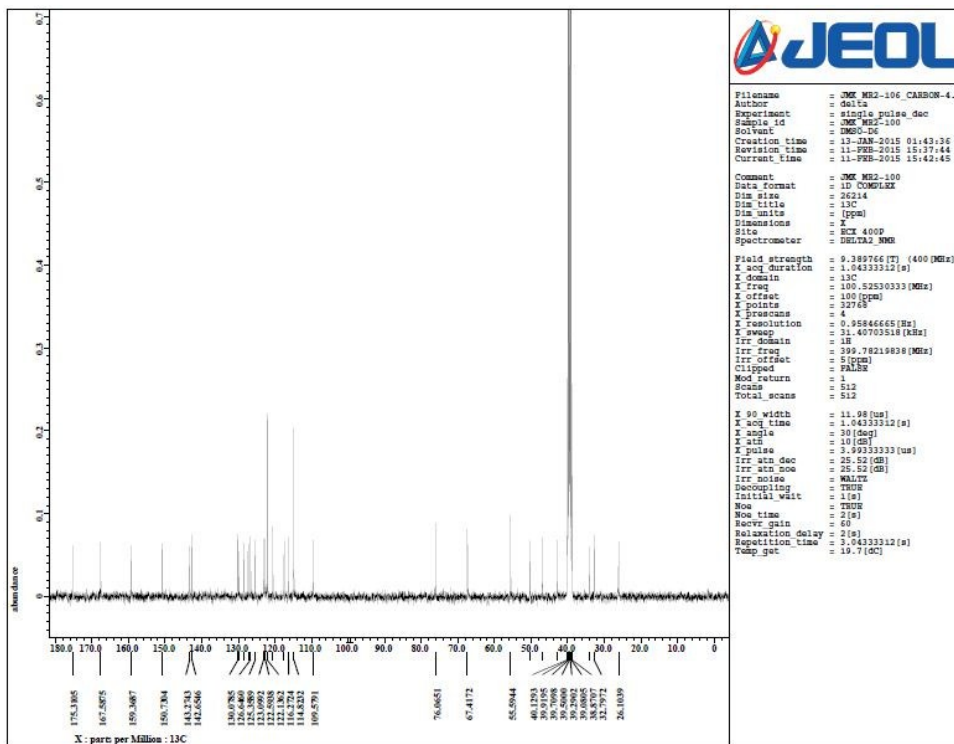

Figure 6. Mass spectrum of compound 5b.

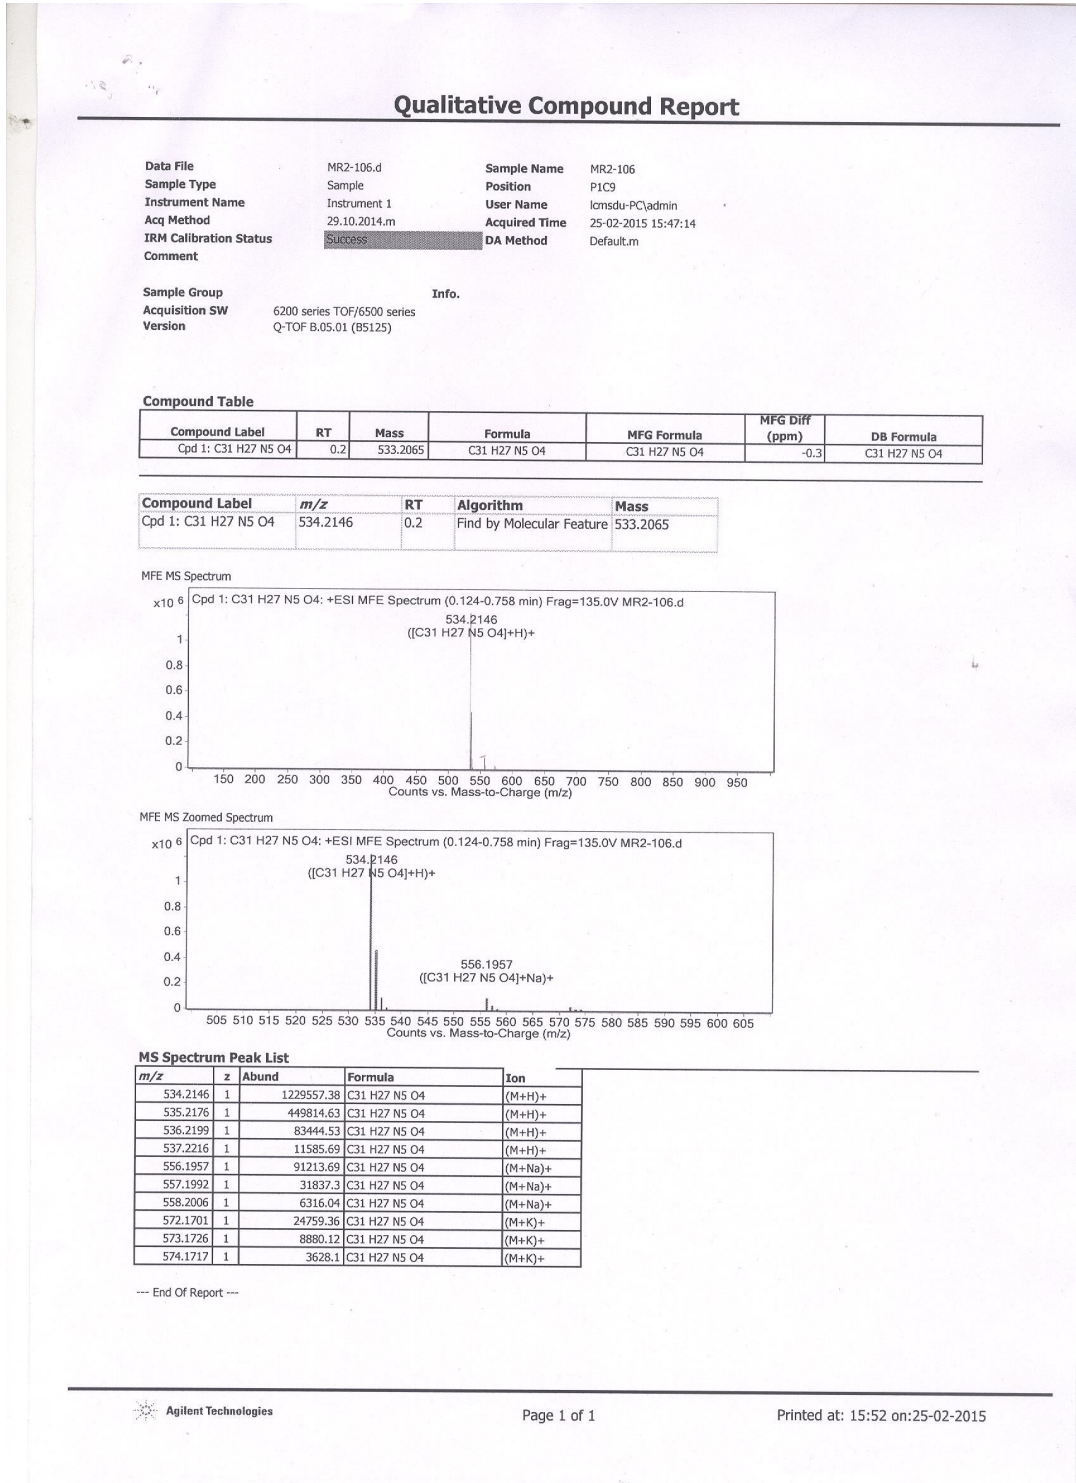

Figure 7.  $^1\text{H}$  NMR spectrum of compound **5c** (400 MHz, DMSO).

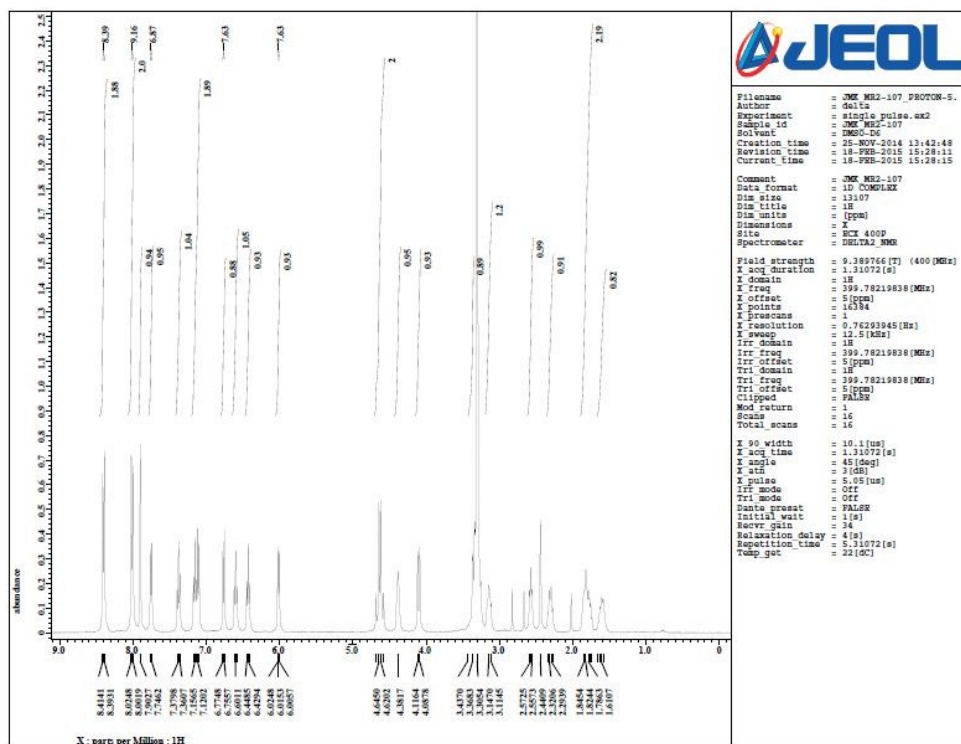

Figure 8.  $^{13}\text{C}$  NMR spectrum of compound **5c** (100 MHz, DMSO).

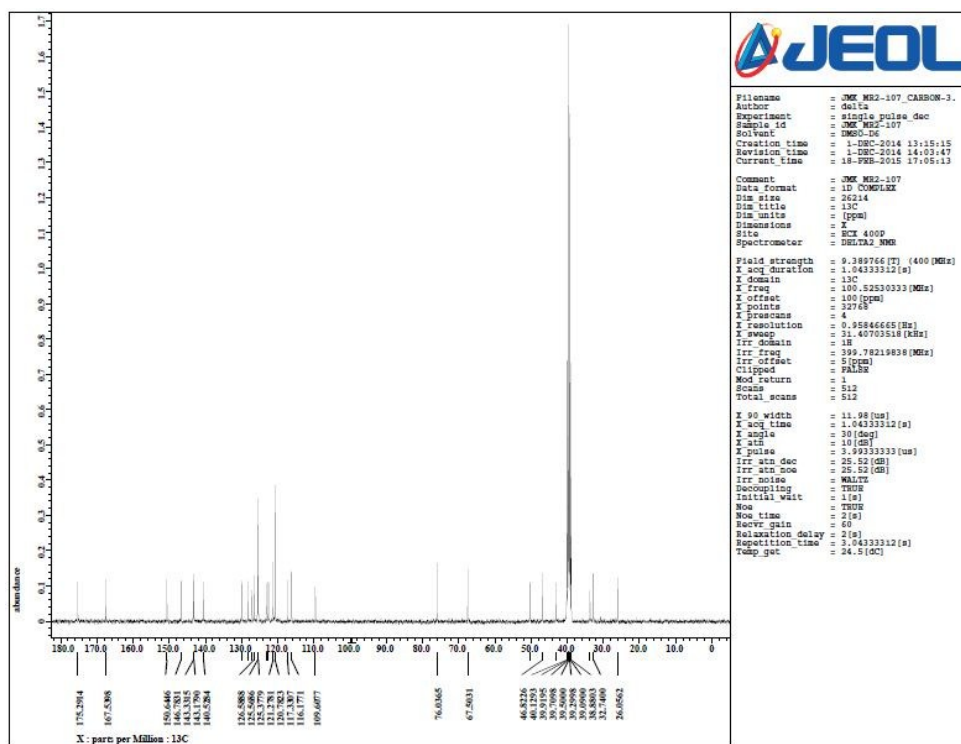

Figure 9. Mass spectrum of compound 5c.

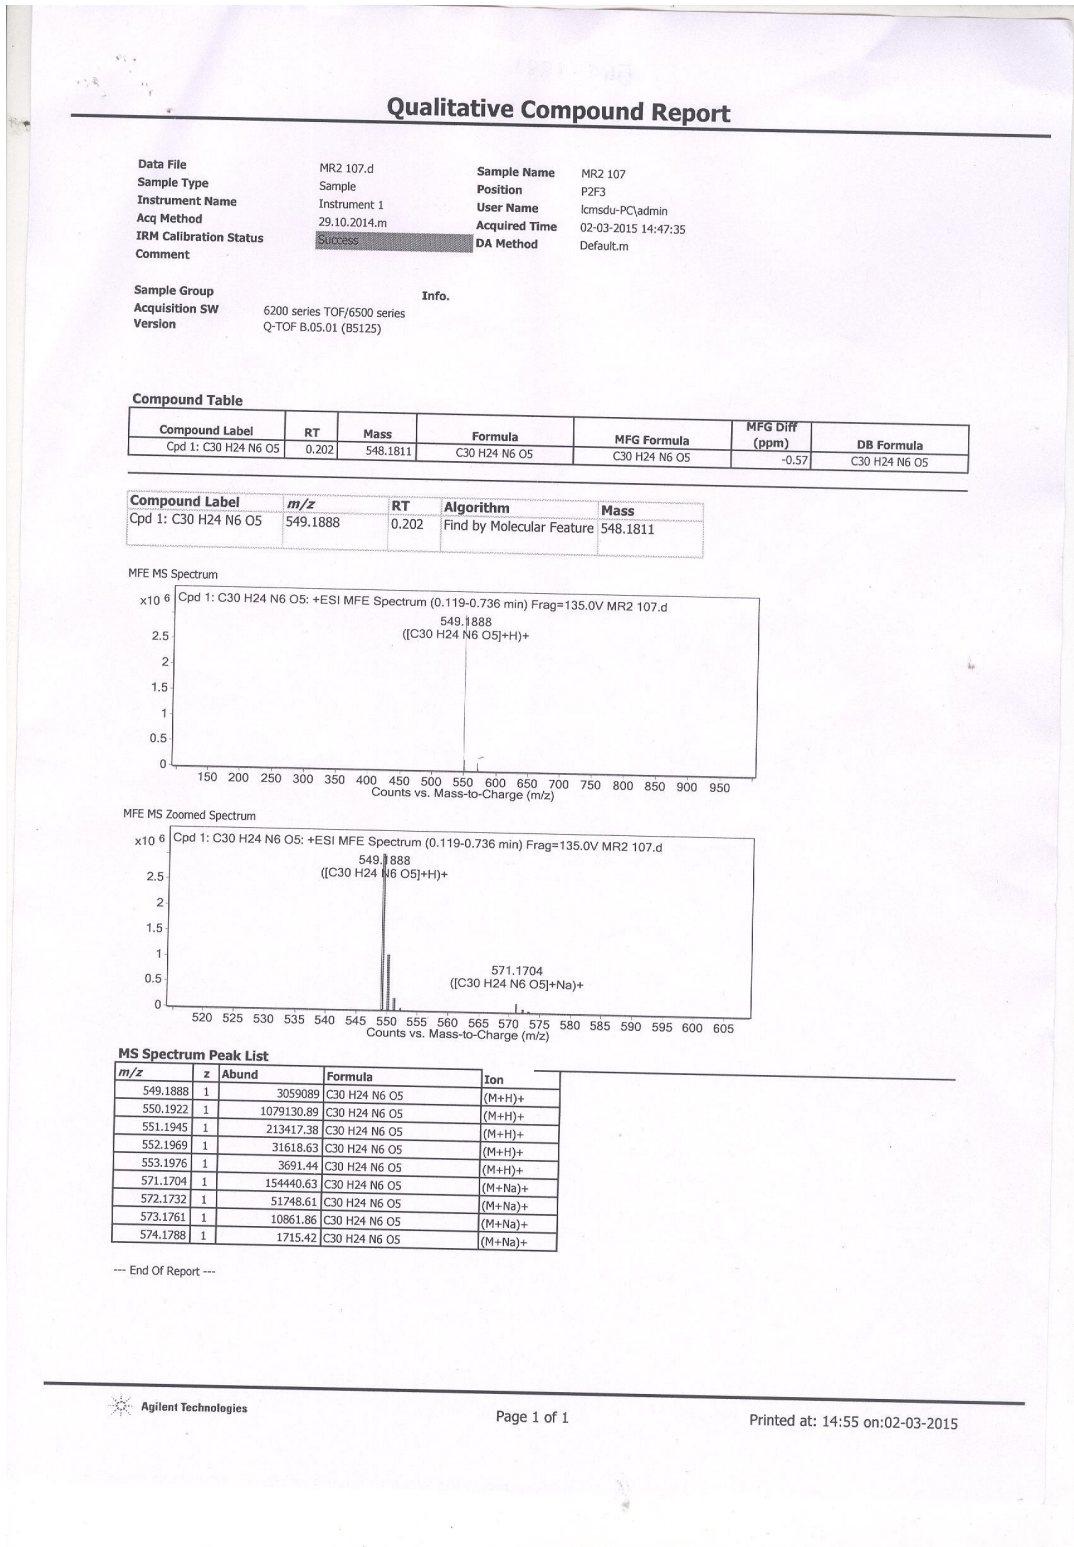

Figure 10. <sup>1</sup>H NMR spectrum of compound 5d (400 MHz, DMSO).

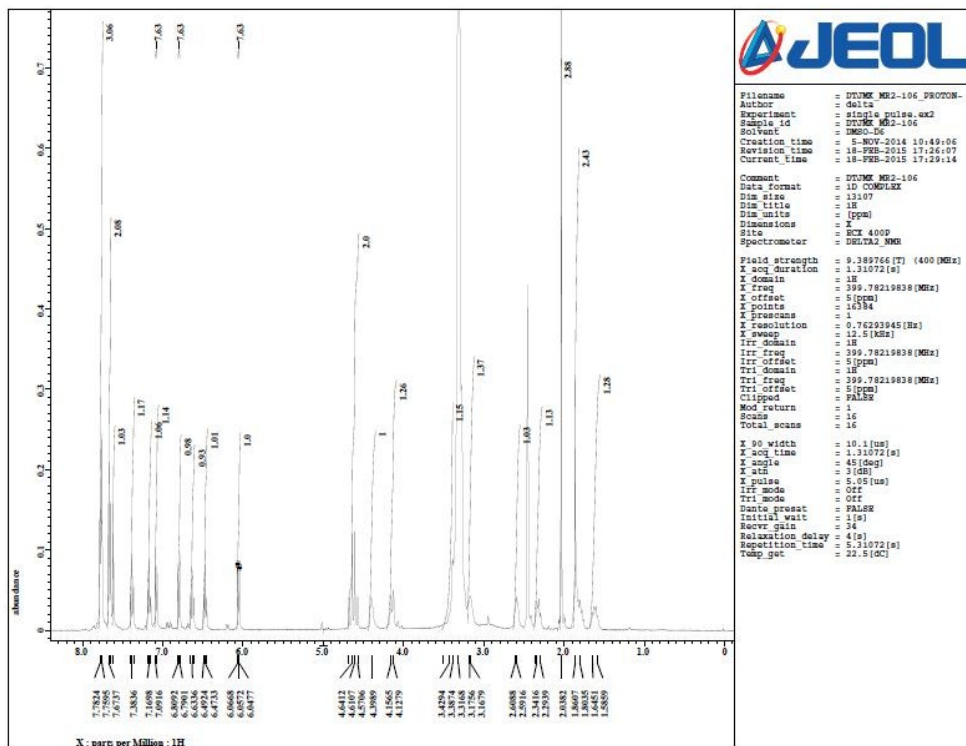

Figure 11. <sup>13</sup>C NMR spectrum of compound 5d (100 MHz, DMSO).

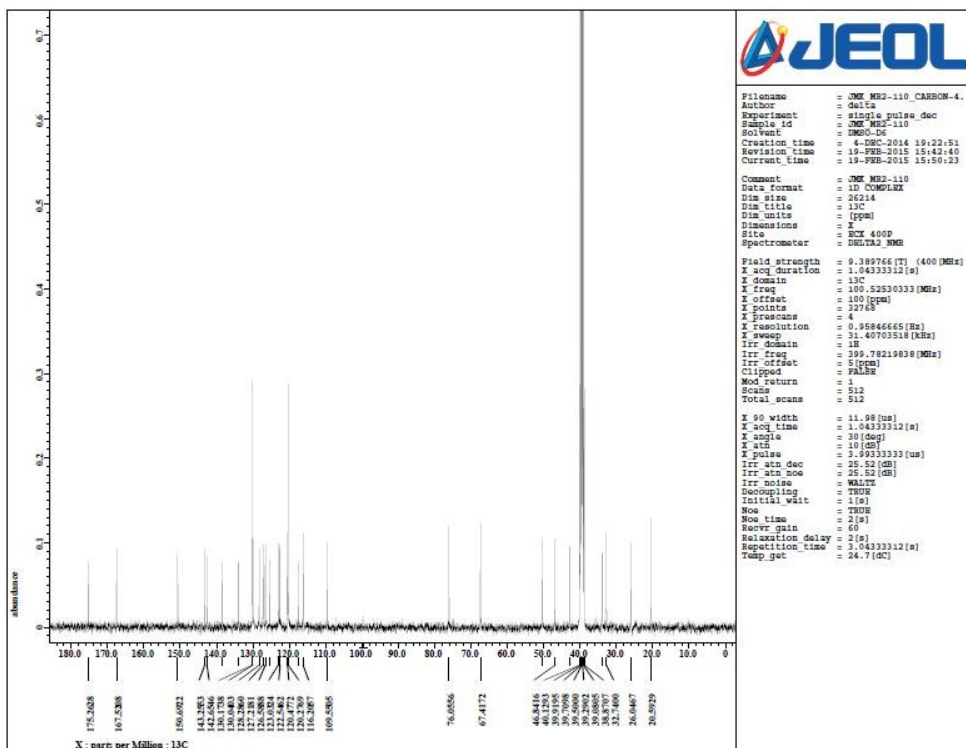



Figure 12. Mass spectrum of compound 5d.

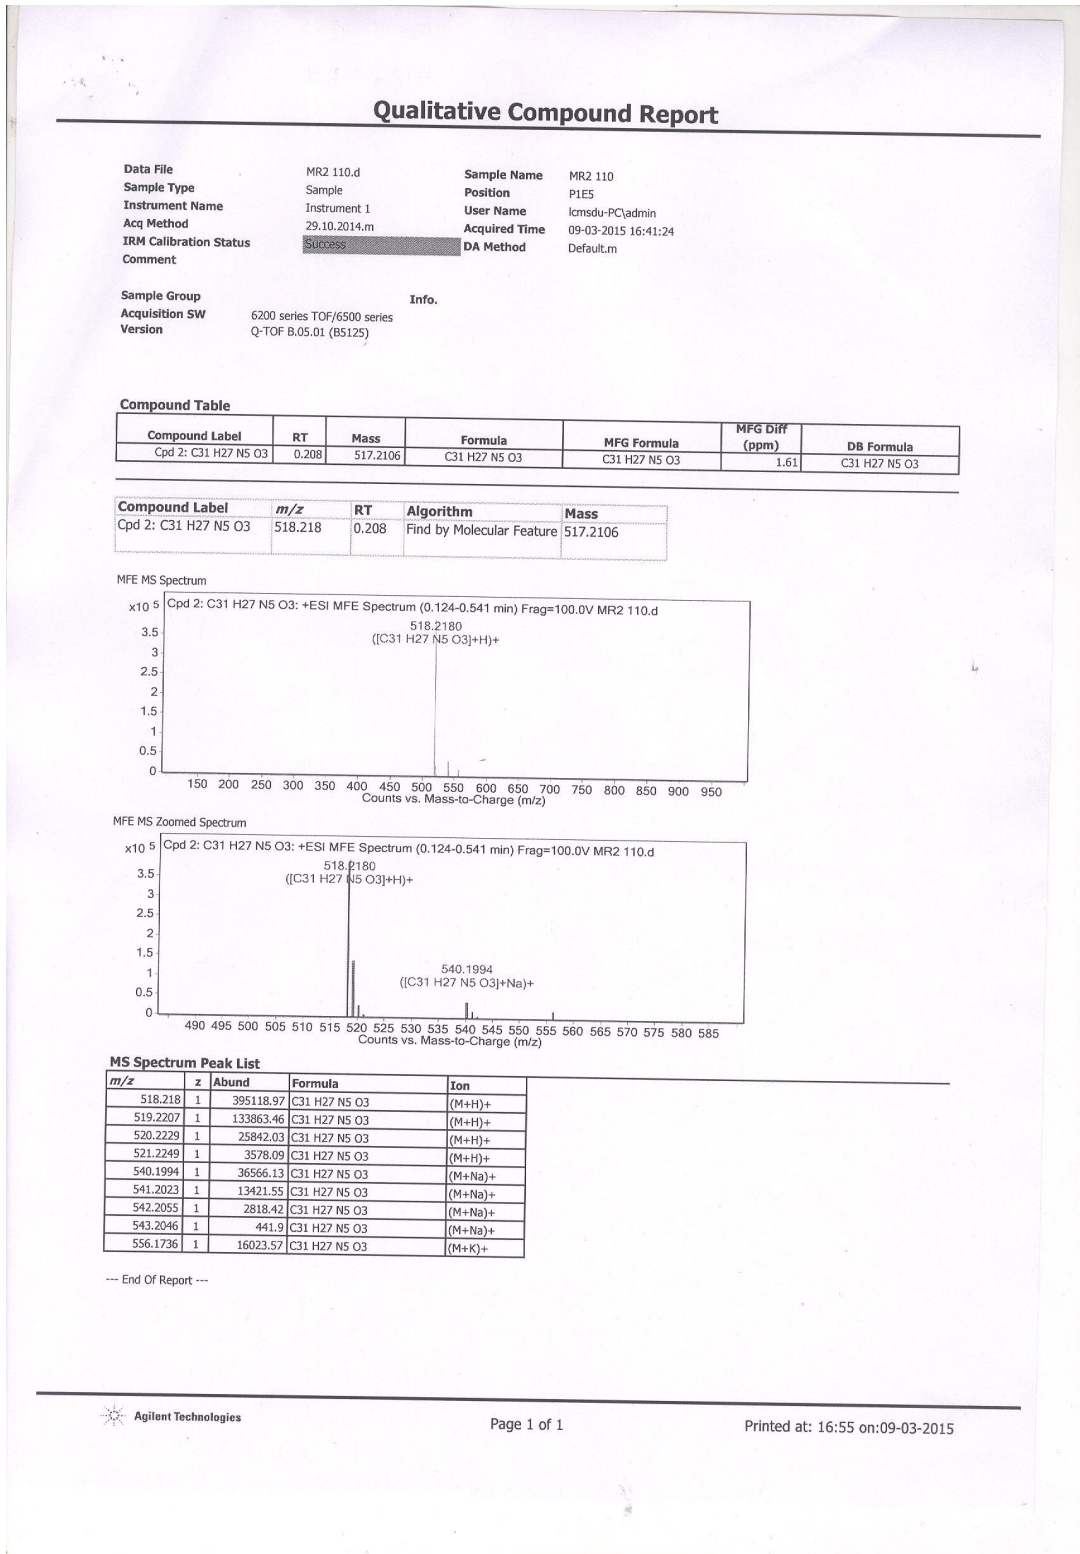

Figure 13. <sup>1</sup>H NMR spectrum of compound 5e (400 MHz, DMSO).

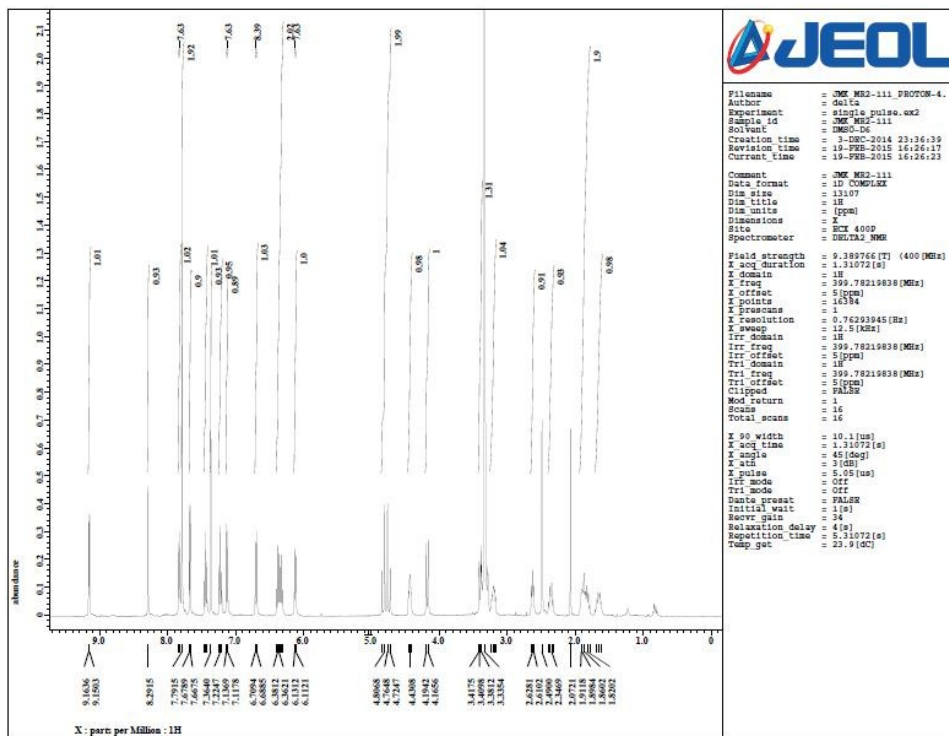

Figure 14. <sup>13</sup>C NMR spectrum of compound 5e (100 MHz, DMSO).

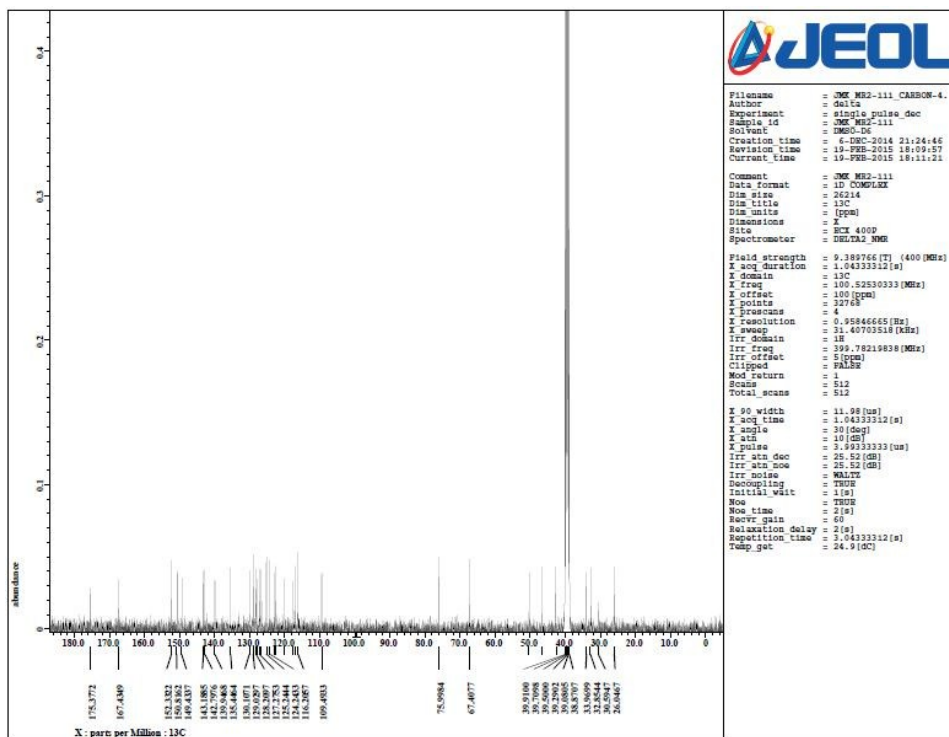

Figure 15. Mass spectrum of compound 5e.

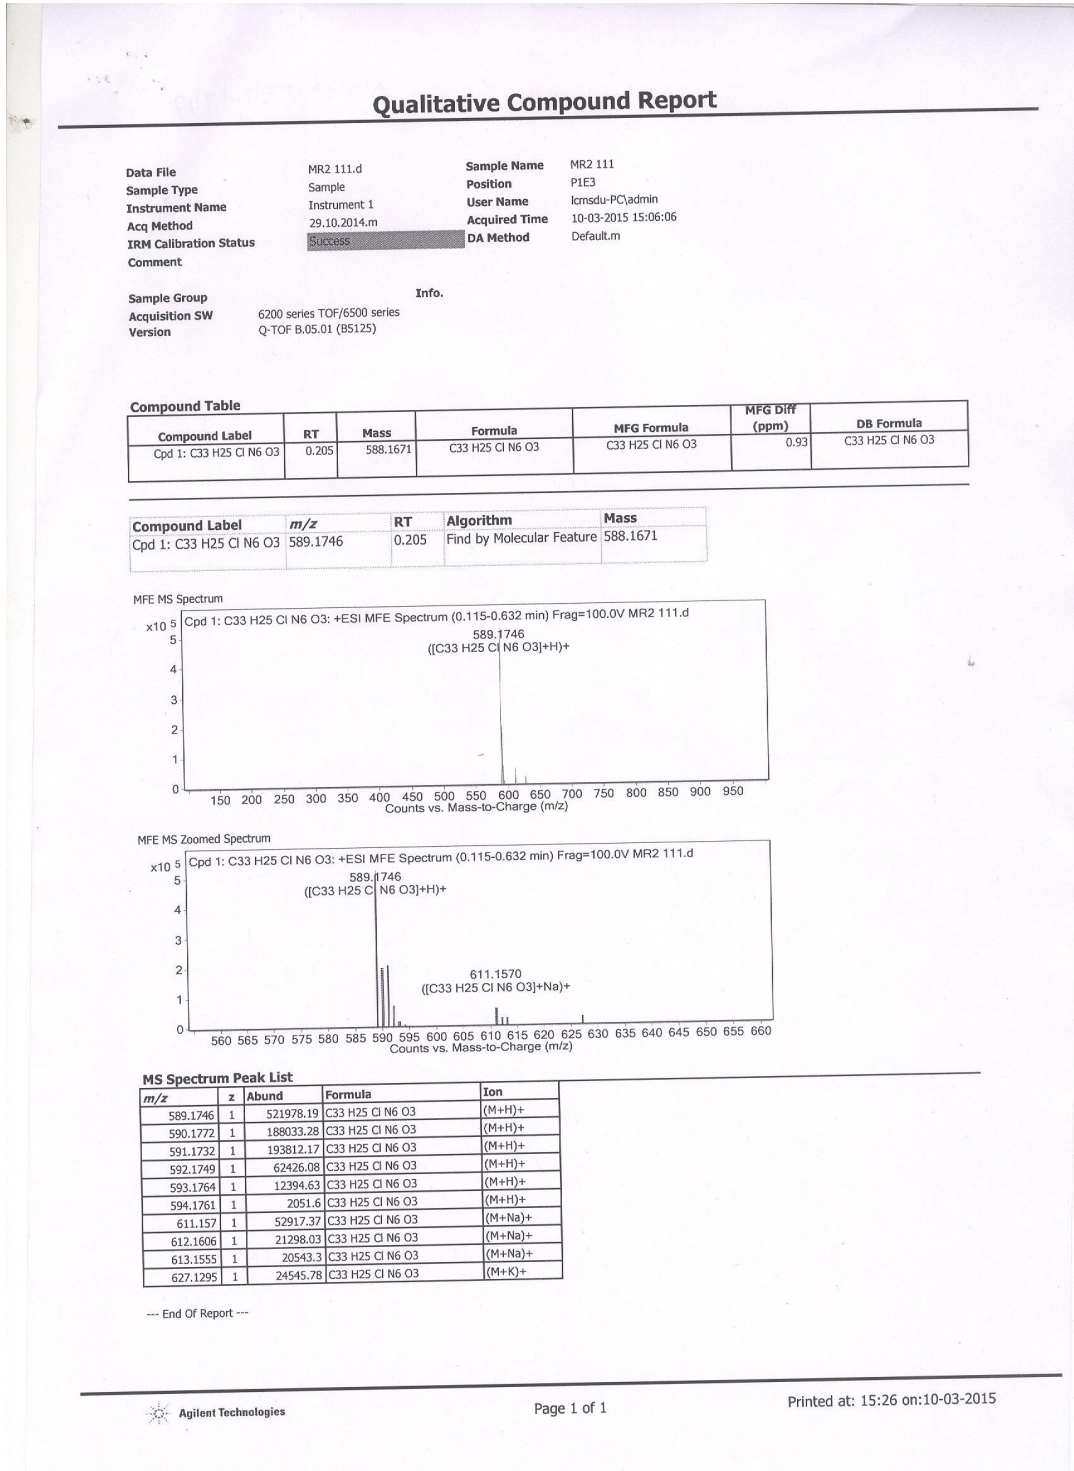

Figure 16.  $^1\text{H}$  NMR spectrum of compound **5f** (400 MHz, DMSO).

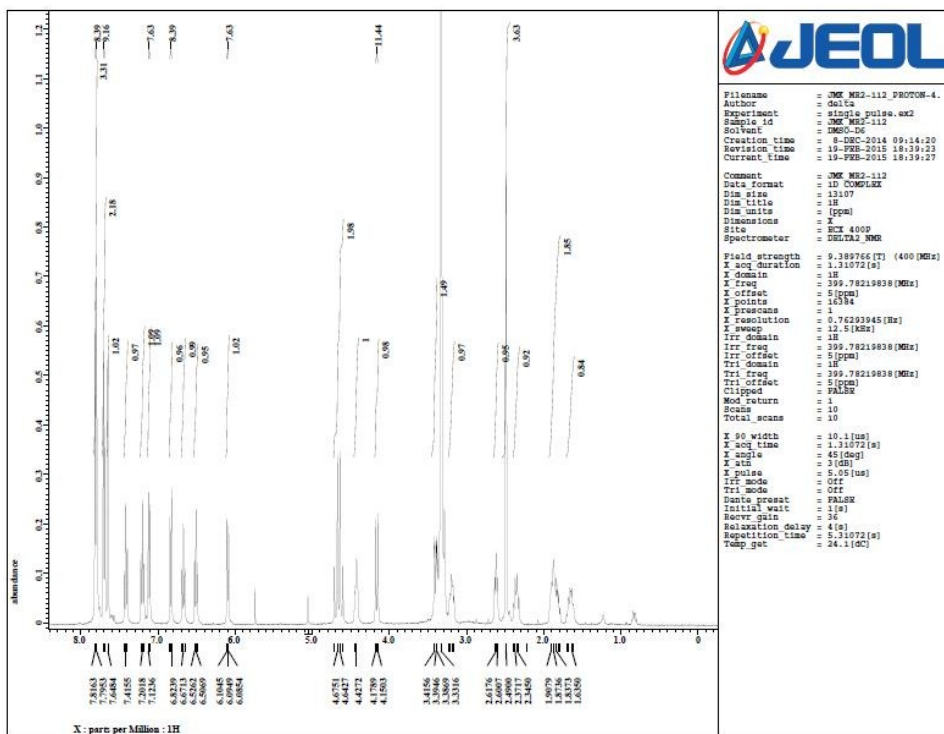

Figure 17.  $^{13}\text{C}$  NMR spectrum of compound **5f** (100 MHz, DMSO).

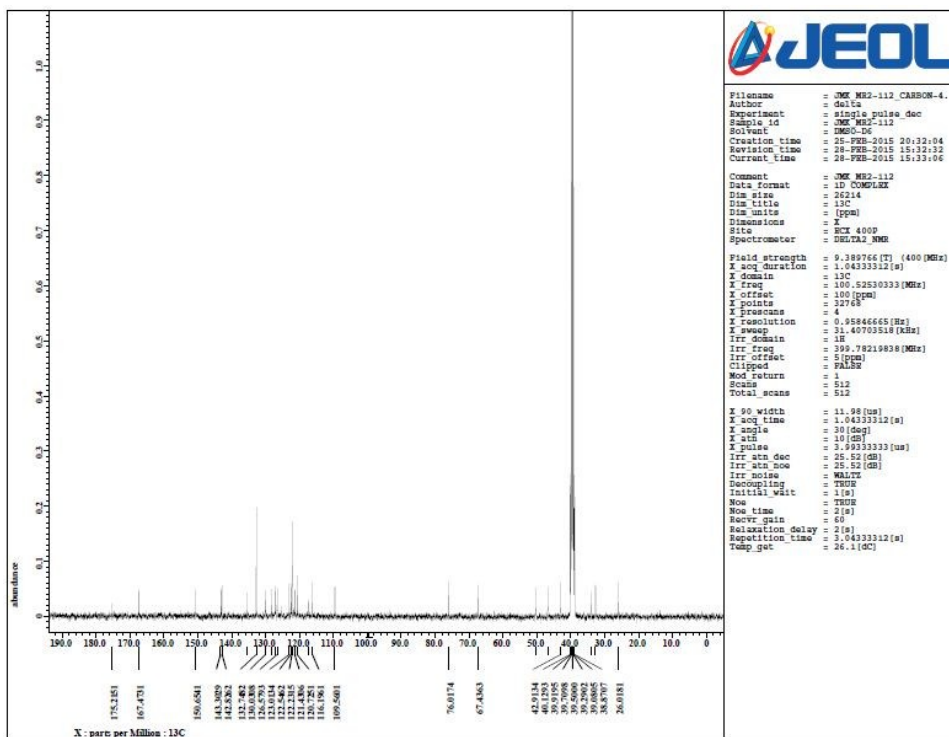

Figure 18. Mass spectrum of compound 5f.

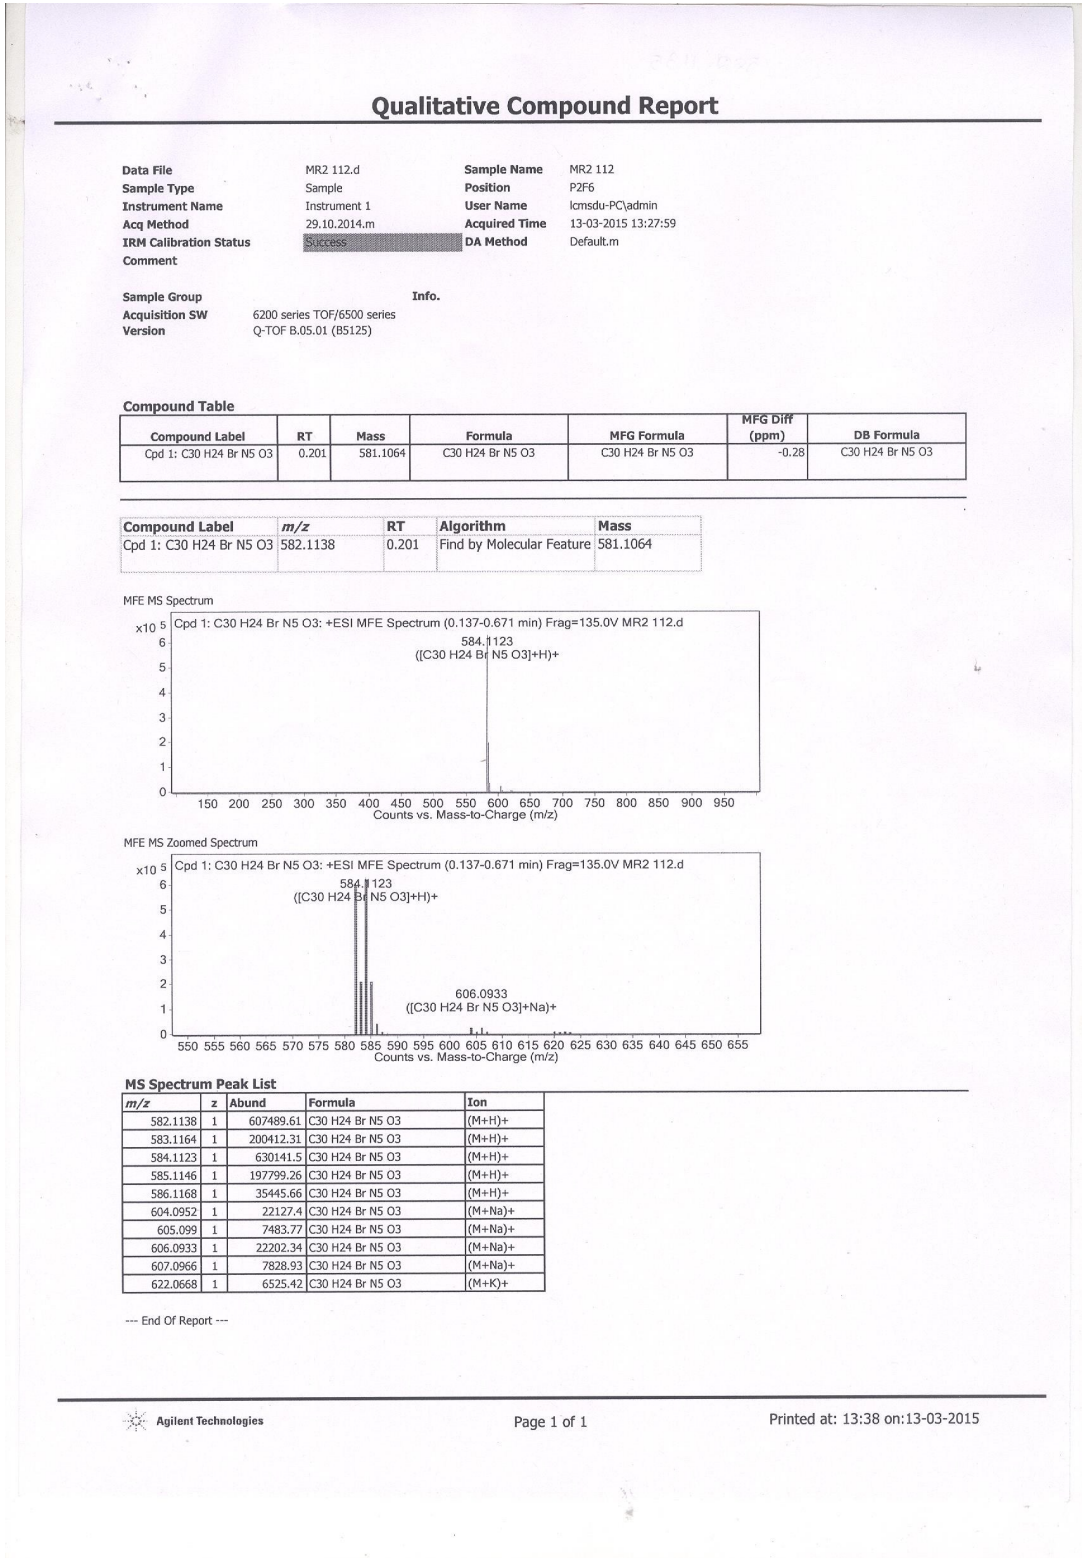

Figure 19. <sup>1</sup>H NMR spectrum of compound 5g (400 MHz, DMSO).

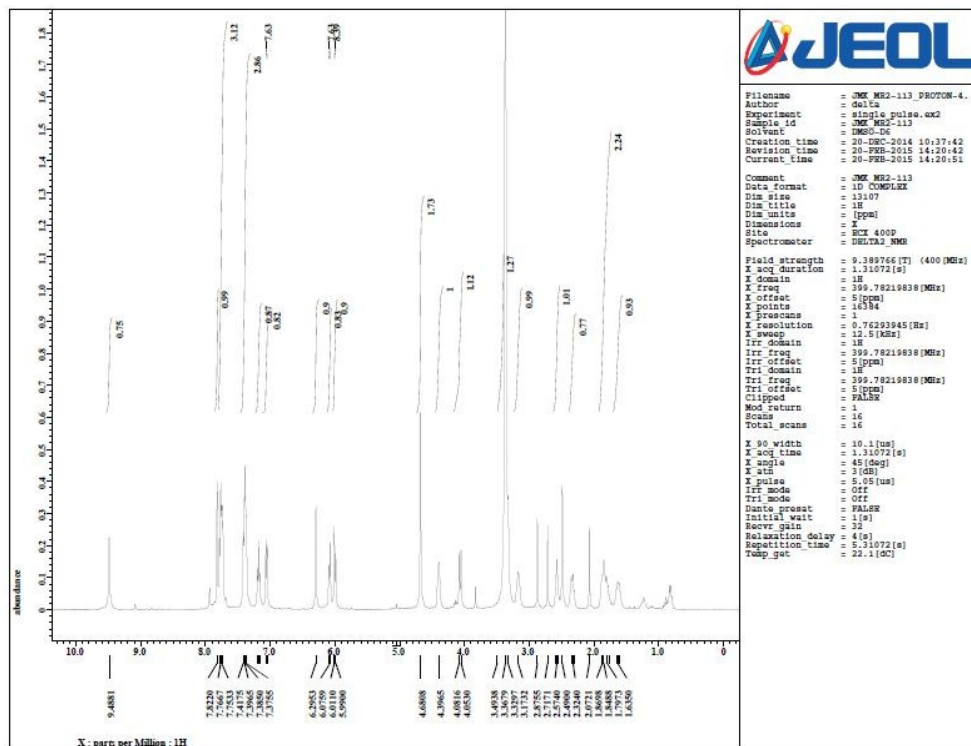

Figure 20. <sup>13</sup>C NMR spectrum of compound 5g (100 MHz, DMSO).

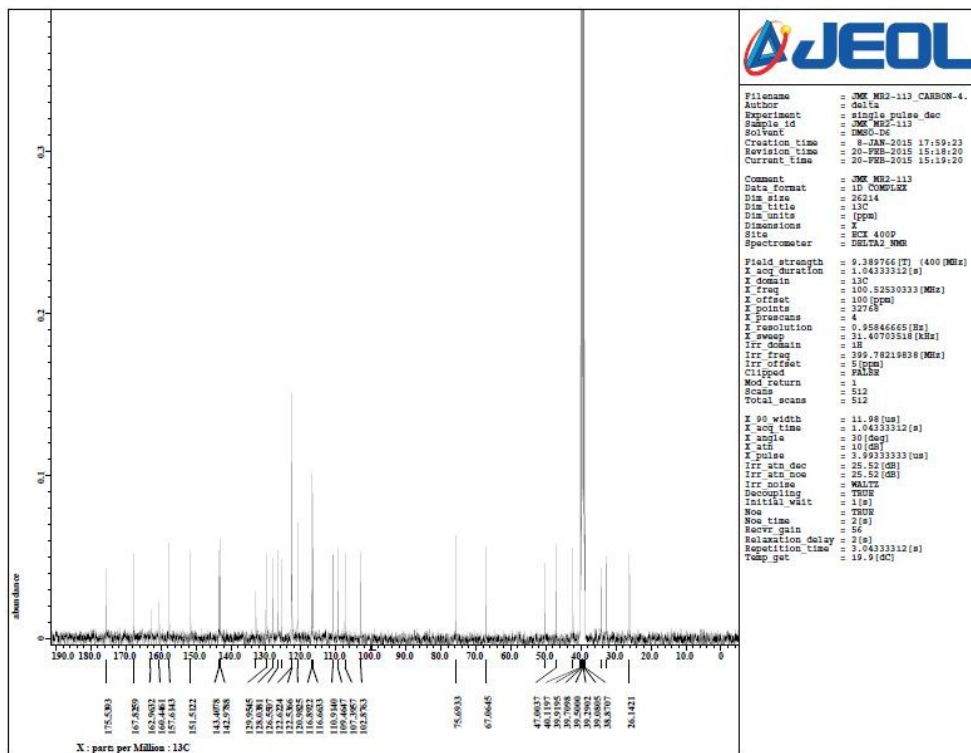

Figure 21. Mass spectrum of compound 5g.

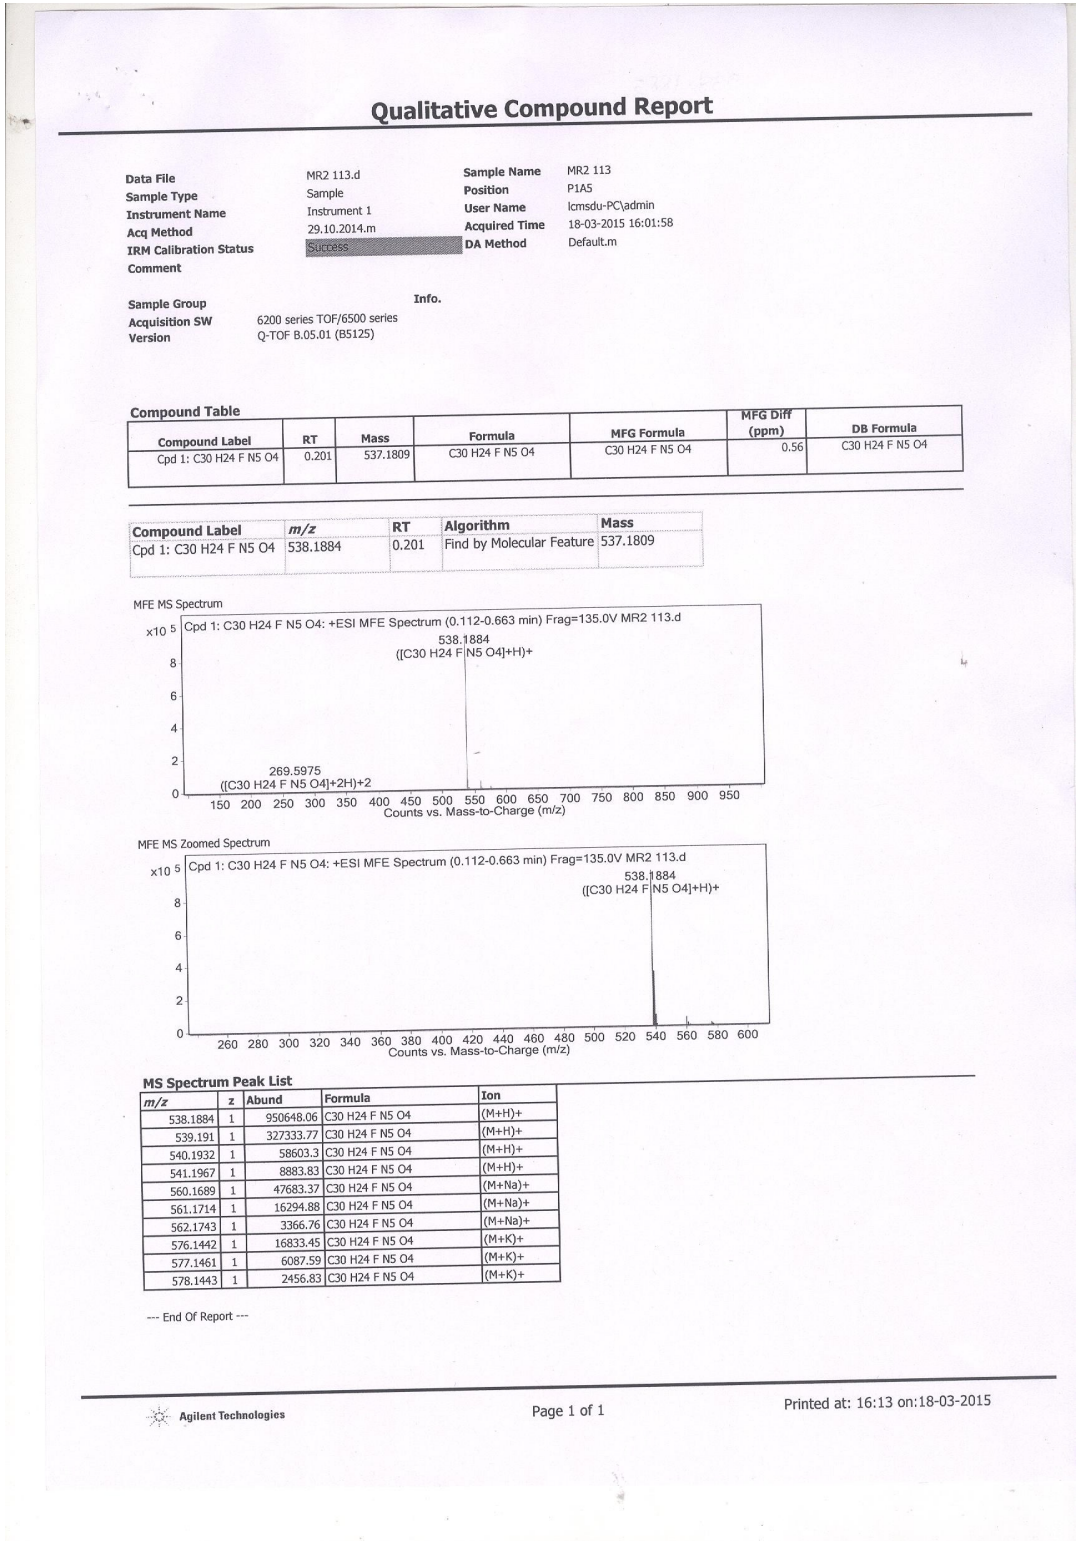

Figure 22. <sup>1</sup>H NMR spectrum of compound **5h** (400 MHz, DMSO).

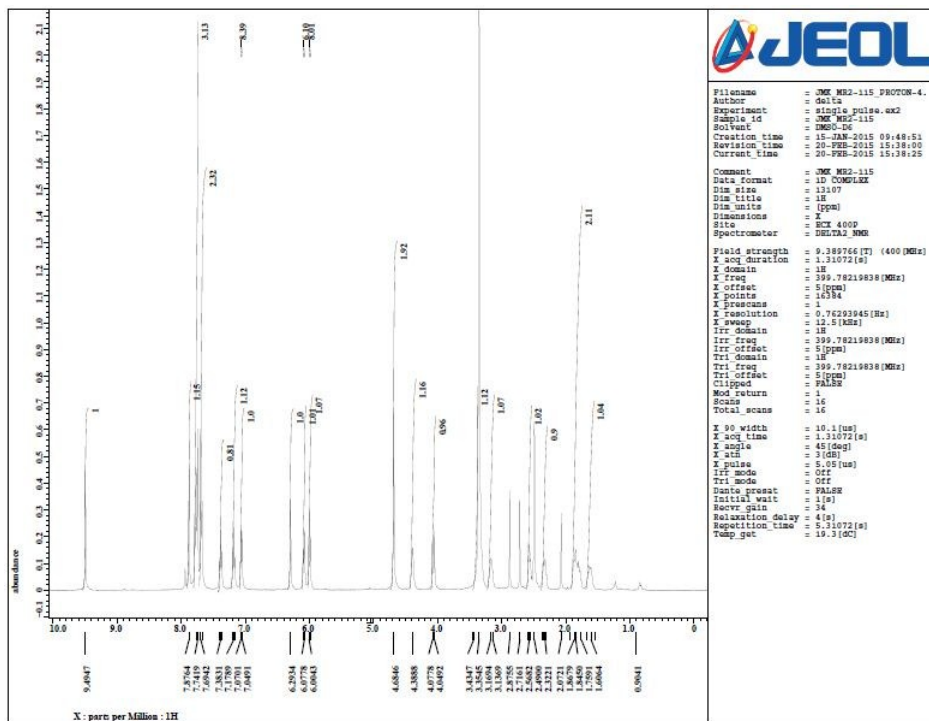

Figure 23. <sup>13</sup>C NMR spectrum of compound **5h** (100 MHz, DMSO).

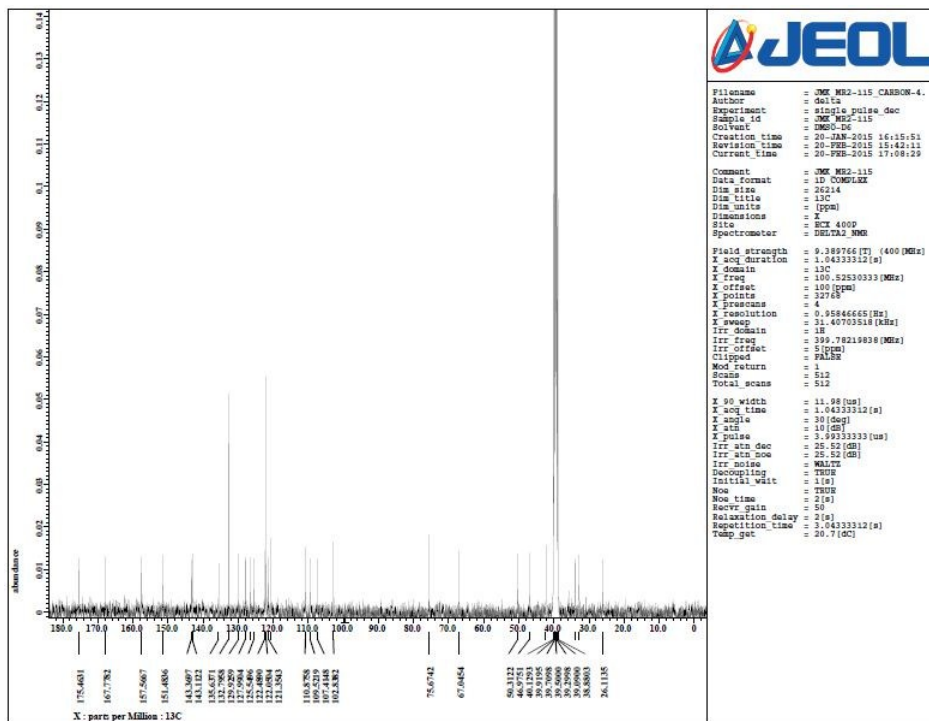



Figure 24. Mass spectrum of compound 5h.

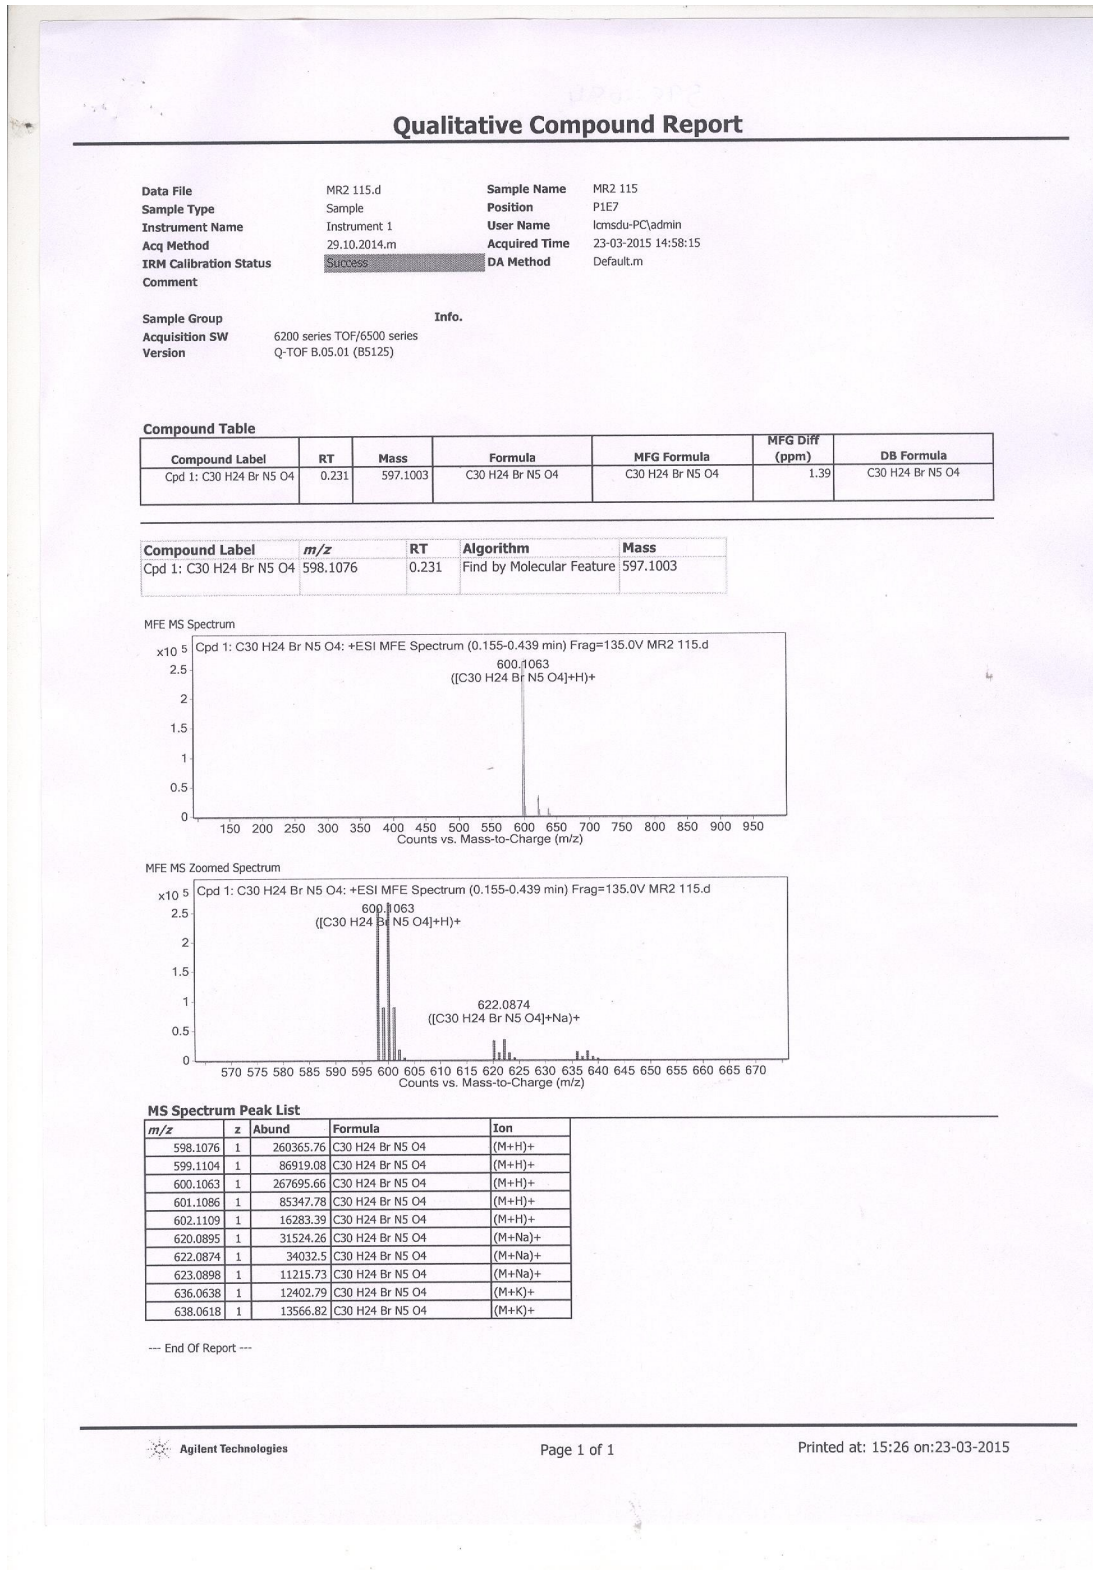

Figure 25.  $^1\text{H}$  NMR spectrum of compound **5i** (400 MHz, DMSO).

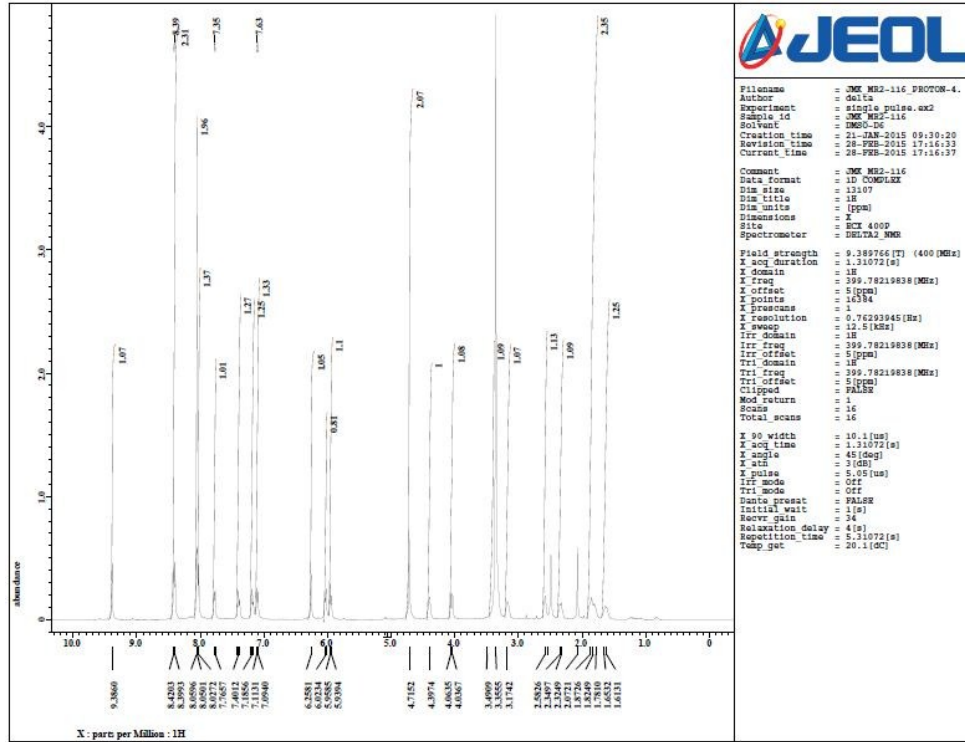

Figure 26.  $^{13}\text{C}$  NMR spectrum of compound **5i** (100 MHz, DMSO).

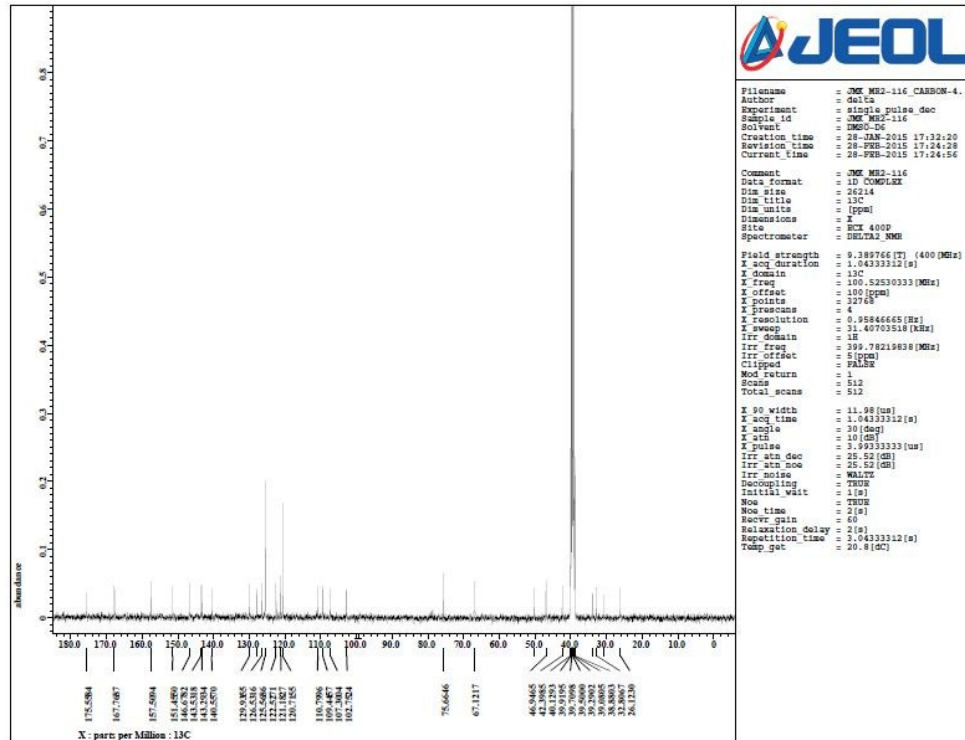

Figure 27. Mass spectrum of compound 5i.

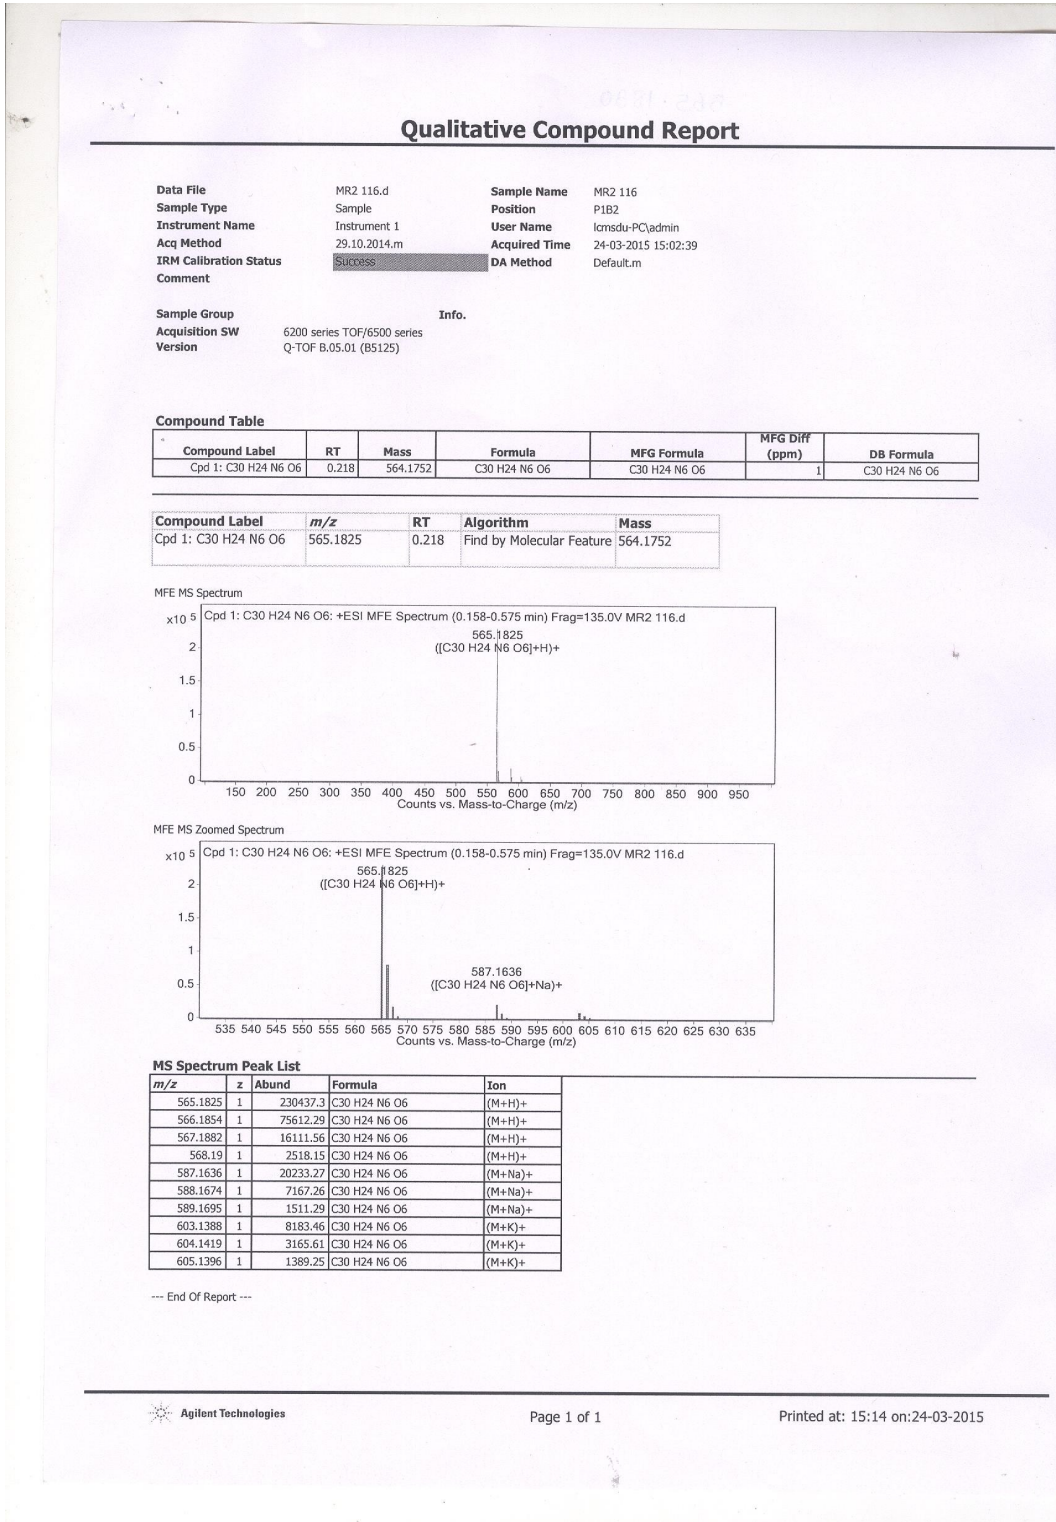

Figure 28.  $^1\text{H}$  NMR spectrum of compound **5j** (400 MHz, DMSO).

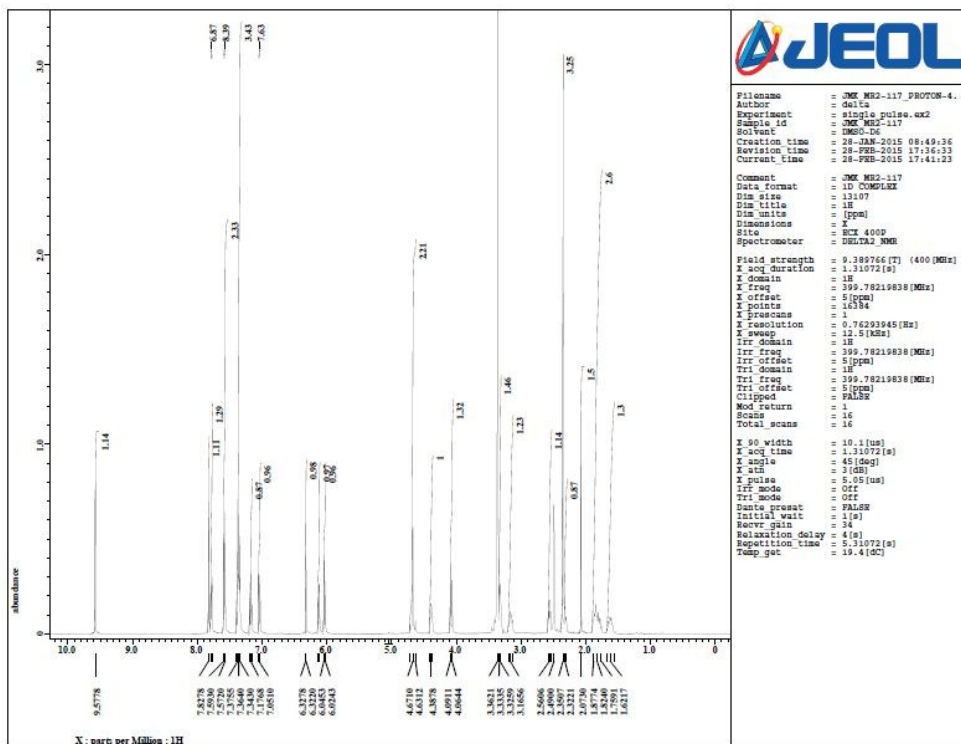

Figure 29.  $^{13}\text{C}$  NMR spectrum of compound **5j** (100 MHz, DMSO).

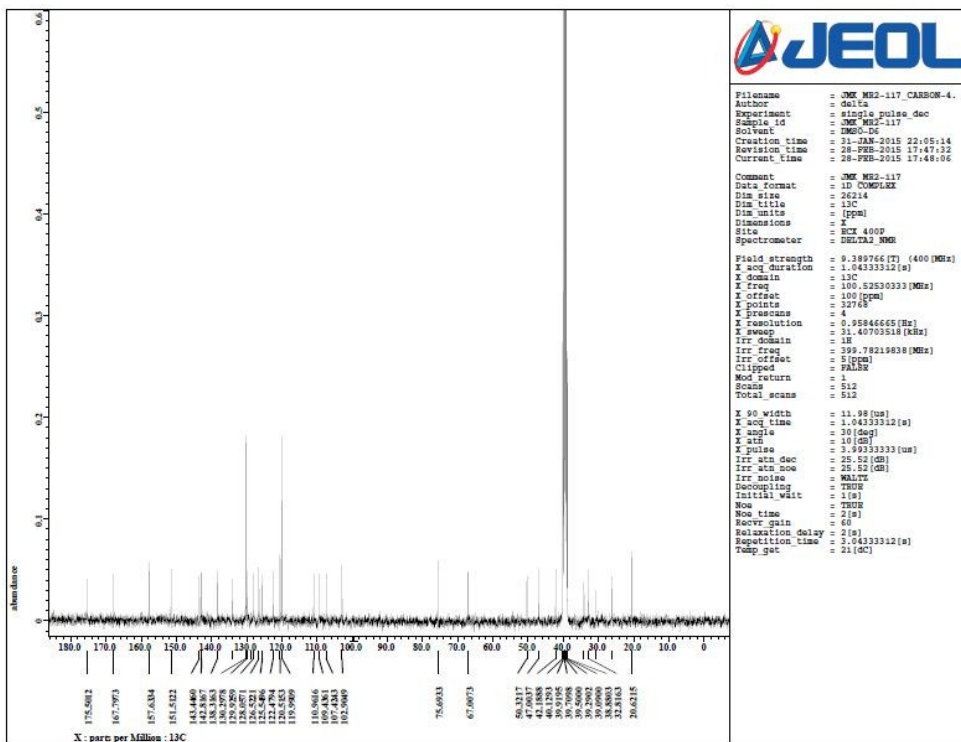

Figure 30. Mass spectrum of compound 5j.

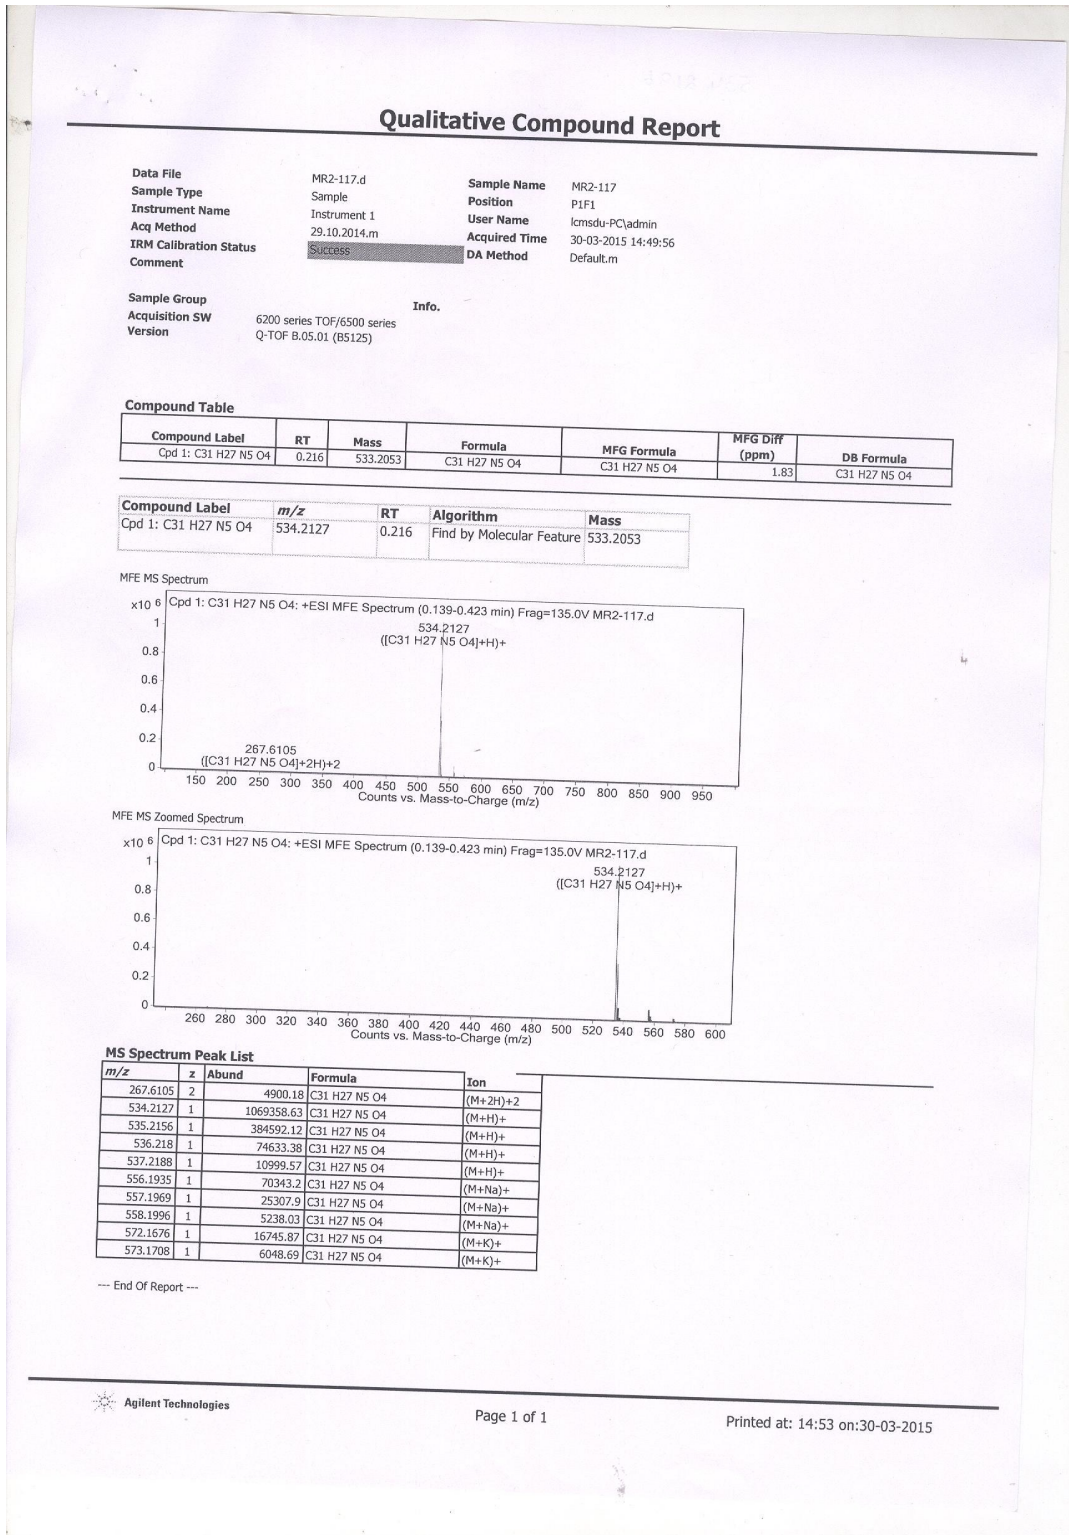

Page 1 of 1

Printed at: 14:53 on:30-03-2015

Figure 31. <sup>1</sup>H NMR spectrum of compound **5k** (400 MHz, DMSO).

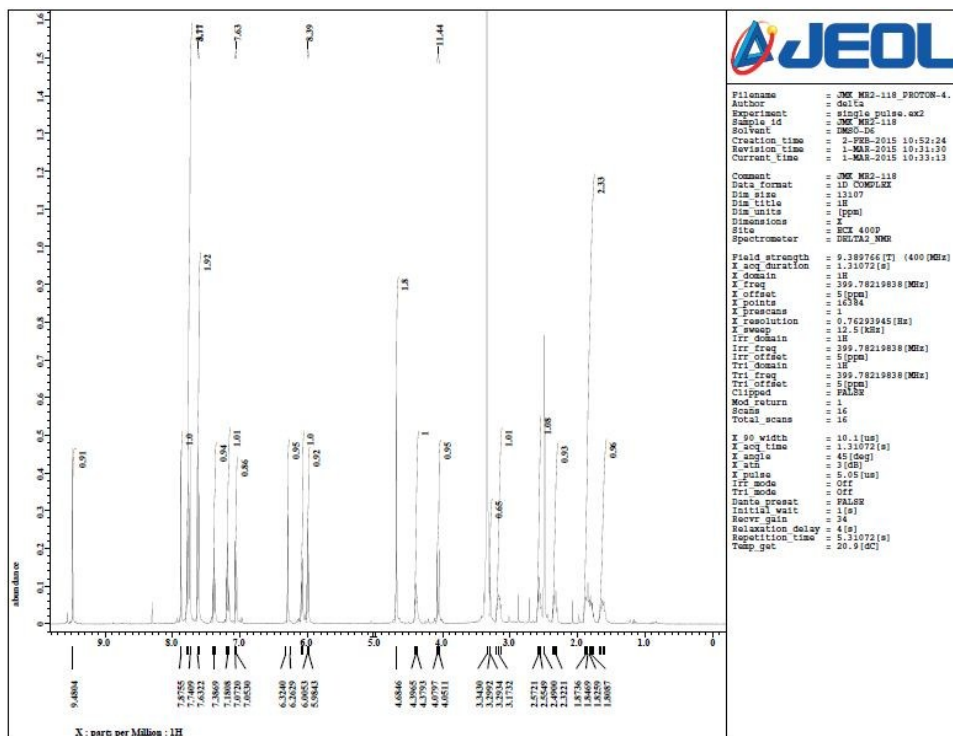

Figure 32. <sup>13</sup>C NMR spectrum of compound **5k** (100 MHz, DMSO).

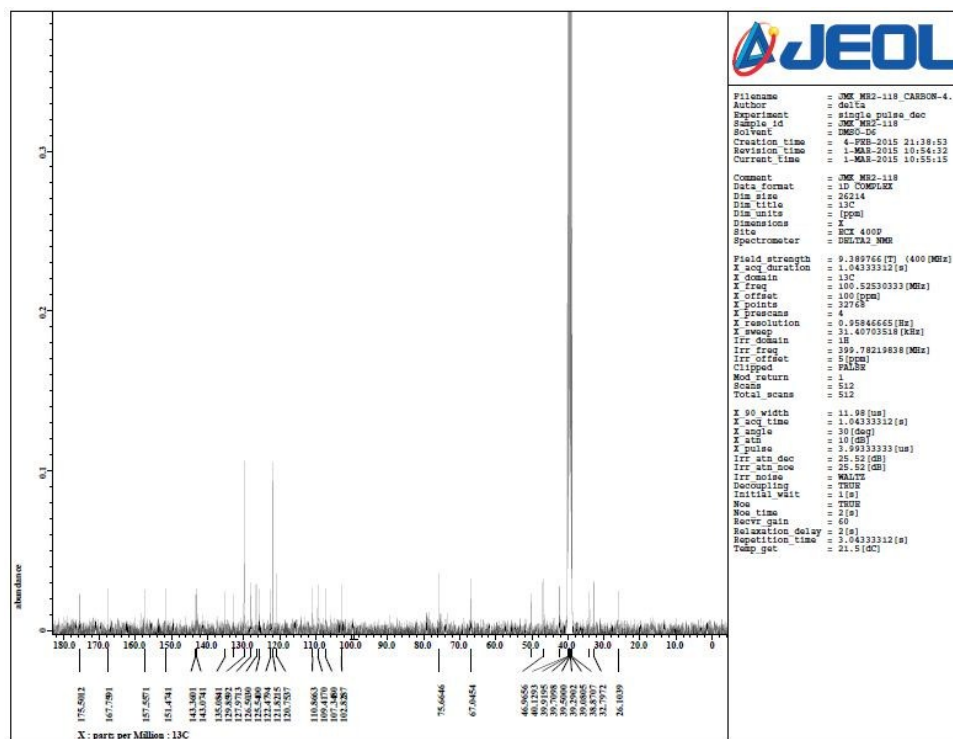

Figure 33. Mass spectrum of compound 5k.

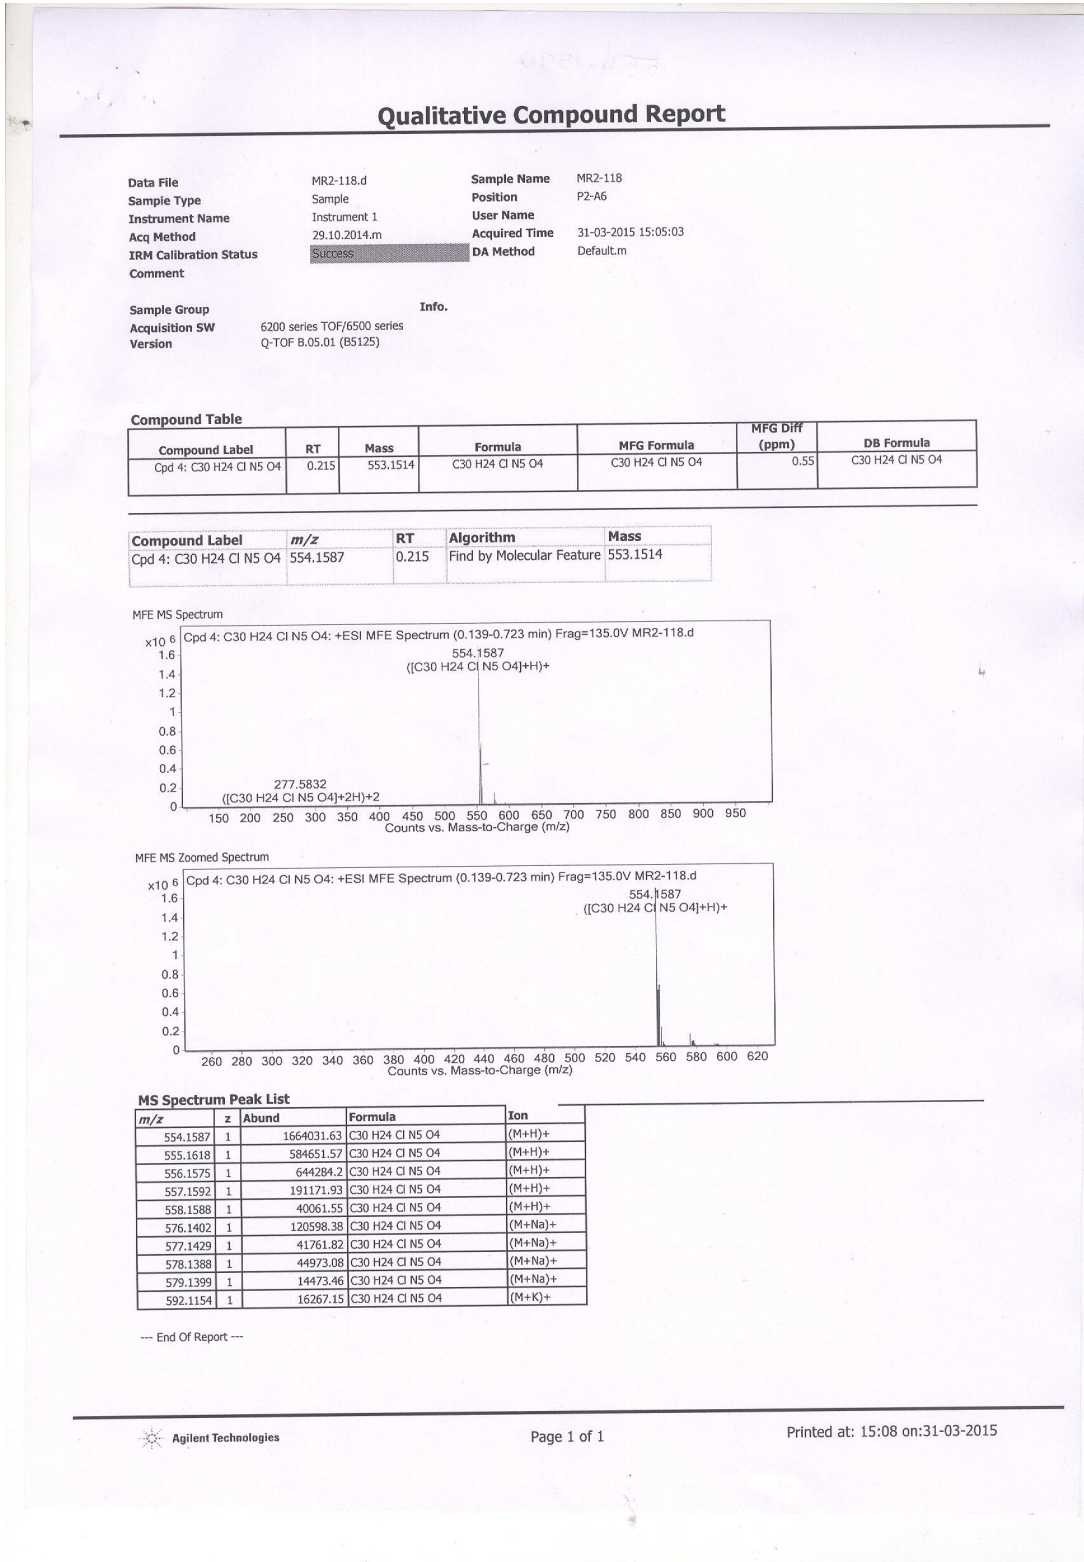

Figure 34. <sup>1</sup>H NMR spectrum of compound **51** (400 MHz, DMSO).

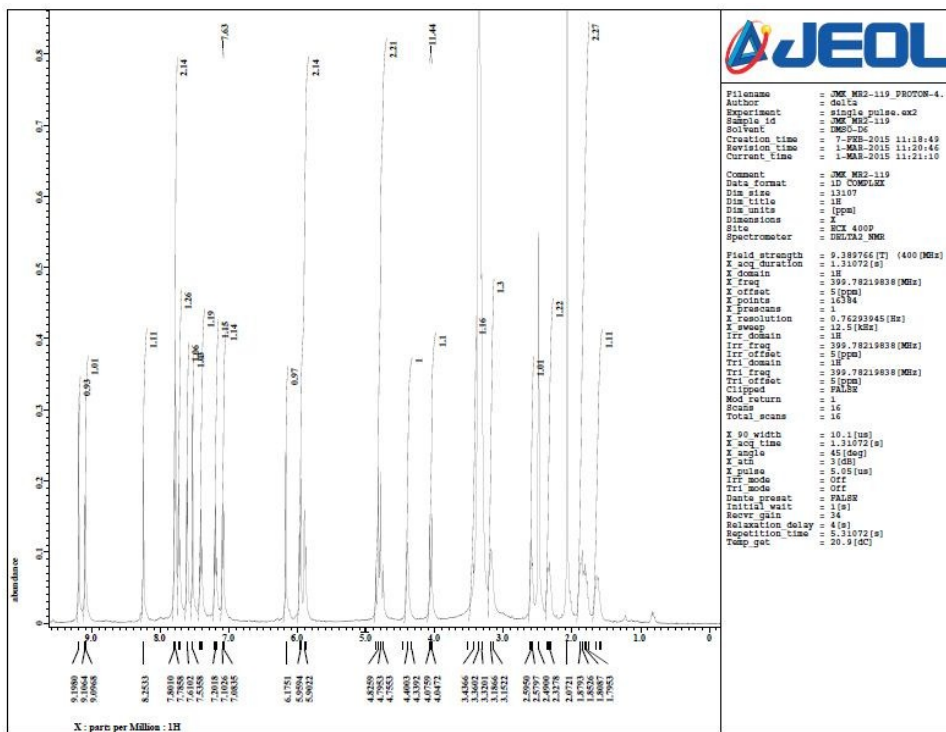

Figure 35. <sup>13</sup>C NMR spectrum of compound **51** (100 MHz, DMSO).

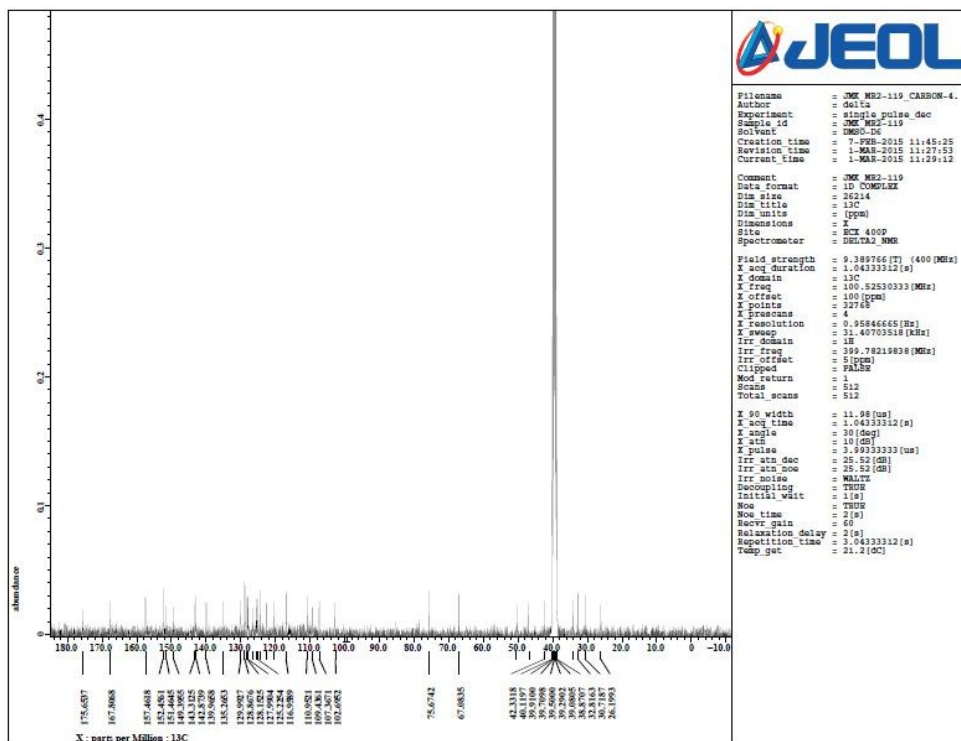



Figure 36. Mass spectrum of compound 5I.

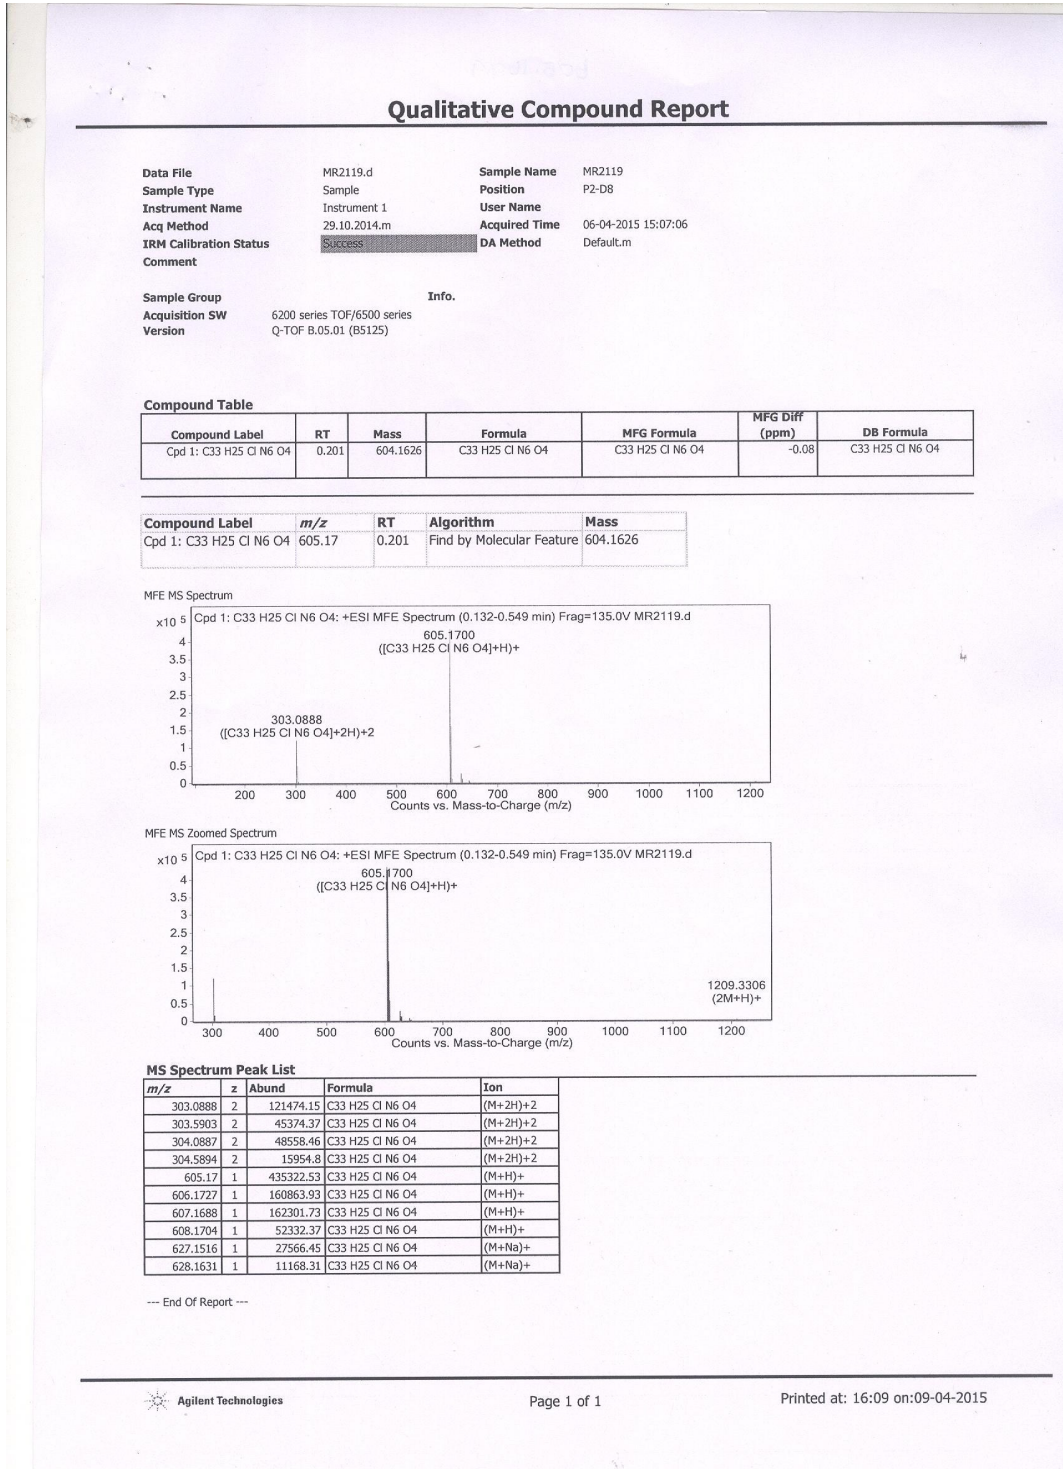

Figure 37.  $^1\text{H}$  NMR spectrum of compound **5m** (400 MHz, DMSO).

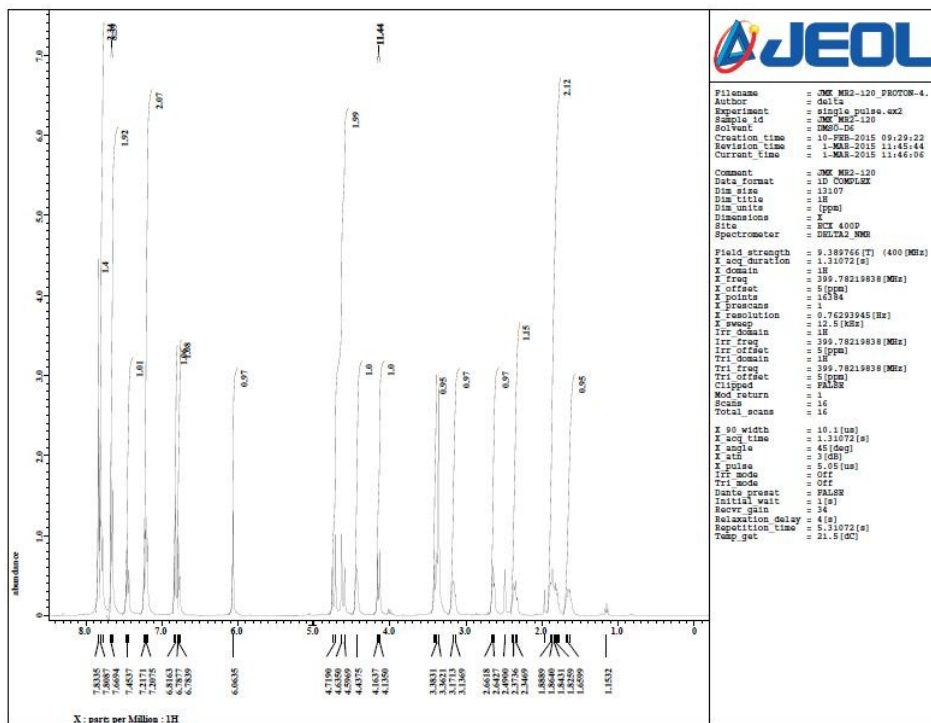

Figure 38.  $^{13}\text{C}$  NMR spectrum of compound **5m** (100 MHz, DMSO).

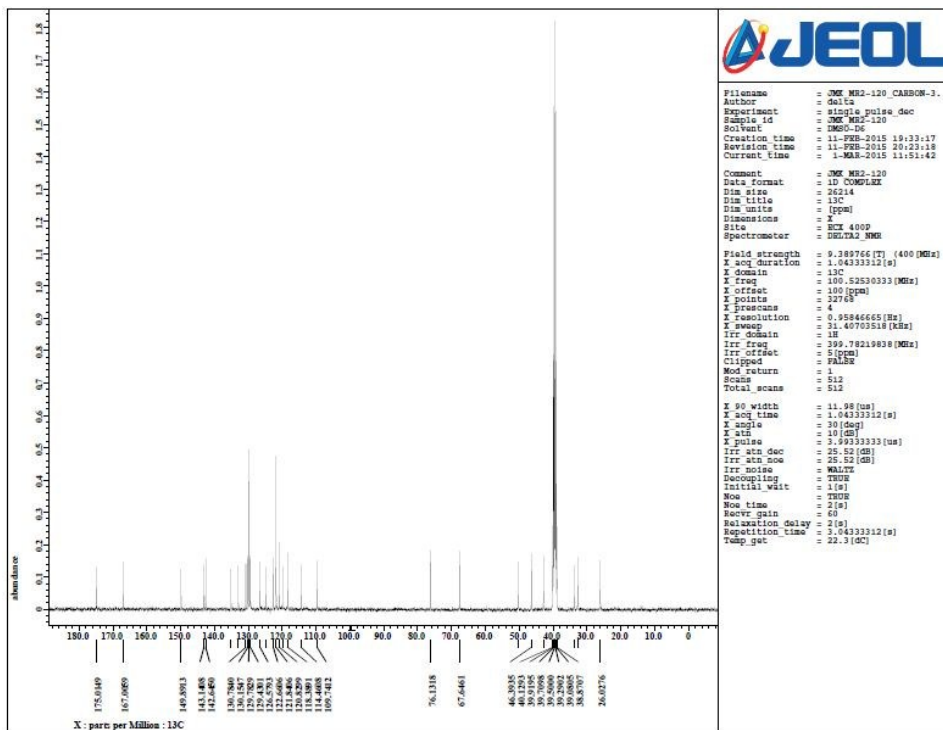

Figure 39. Mass spectrum of compound 5m.

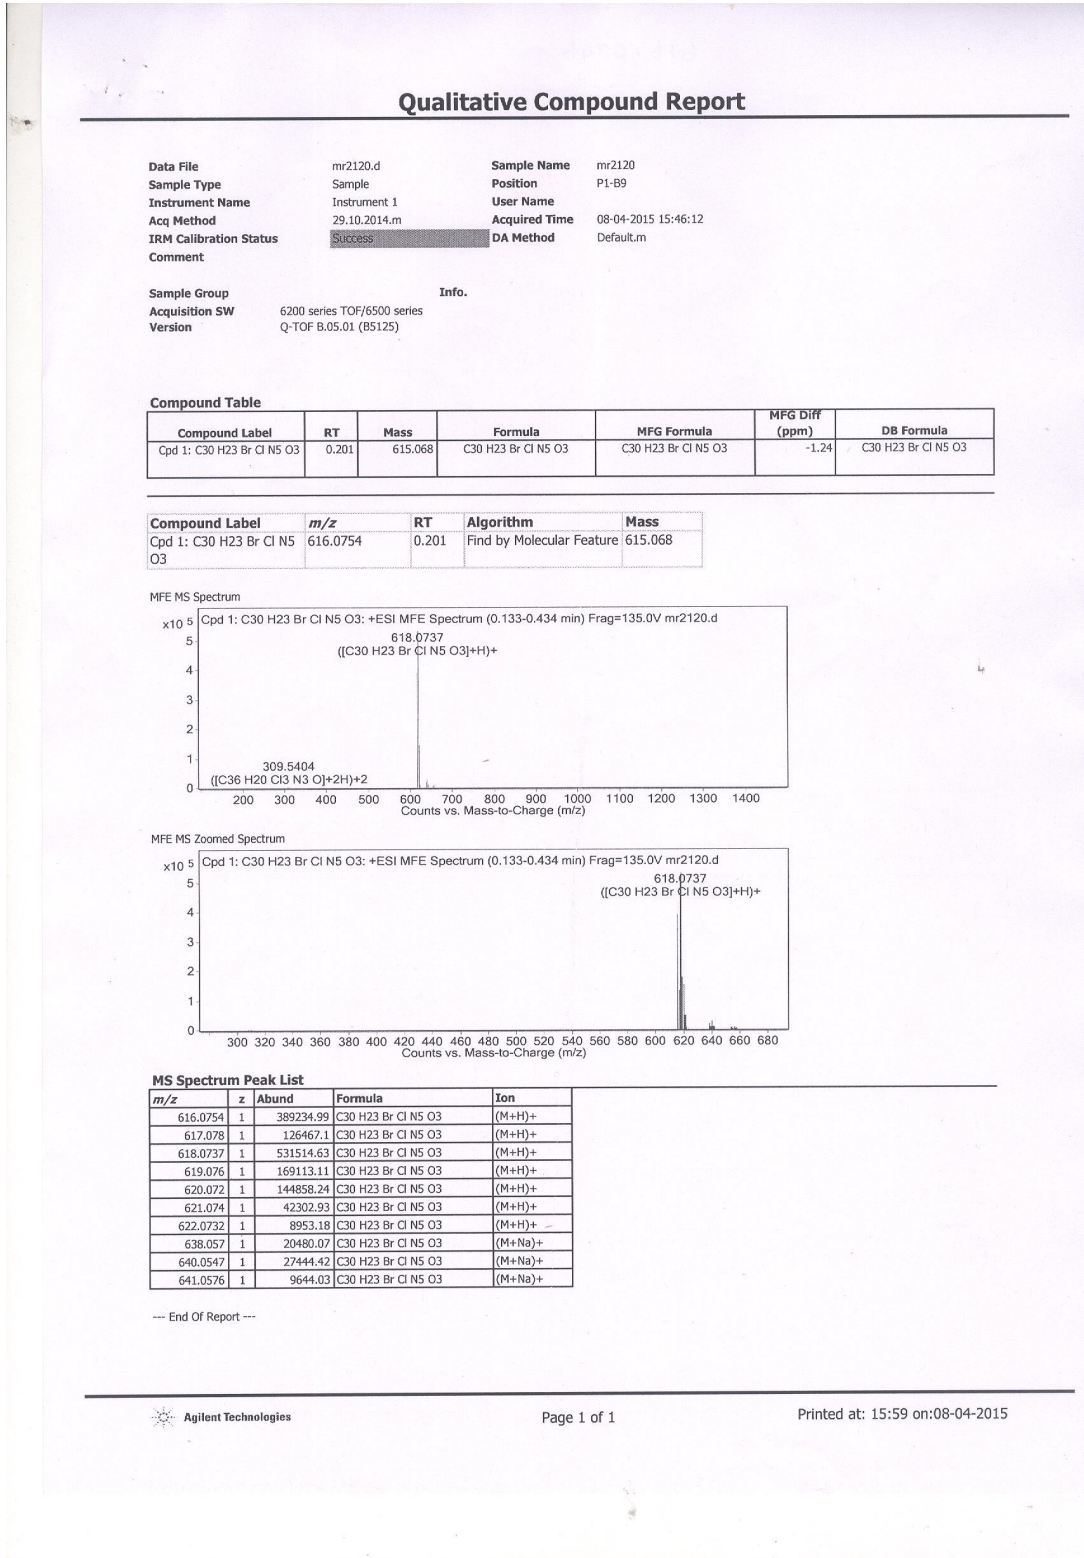

Figure 40. <sup>1</sup>H NMR spectrum of compound **5n** (400 MHz, DMSO).

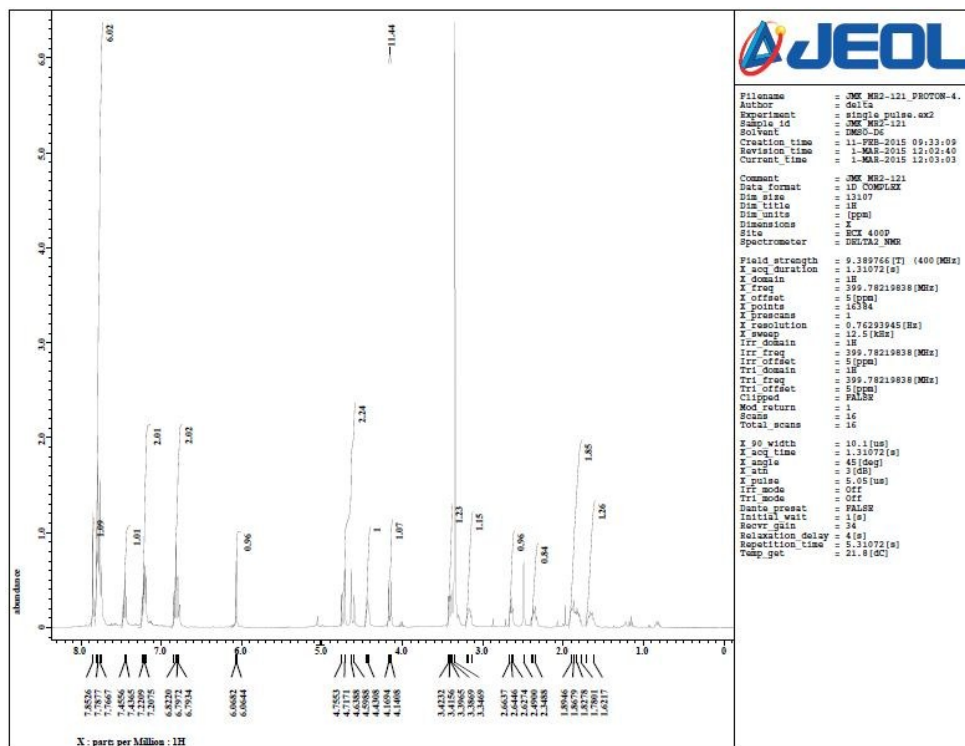

Figure 41. <sup>13</sup>C NMR spectrum of compound **5n** (100 MHz, DMSO).

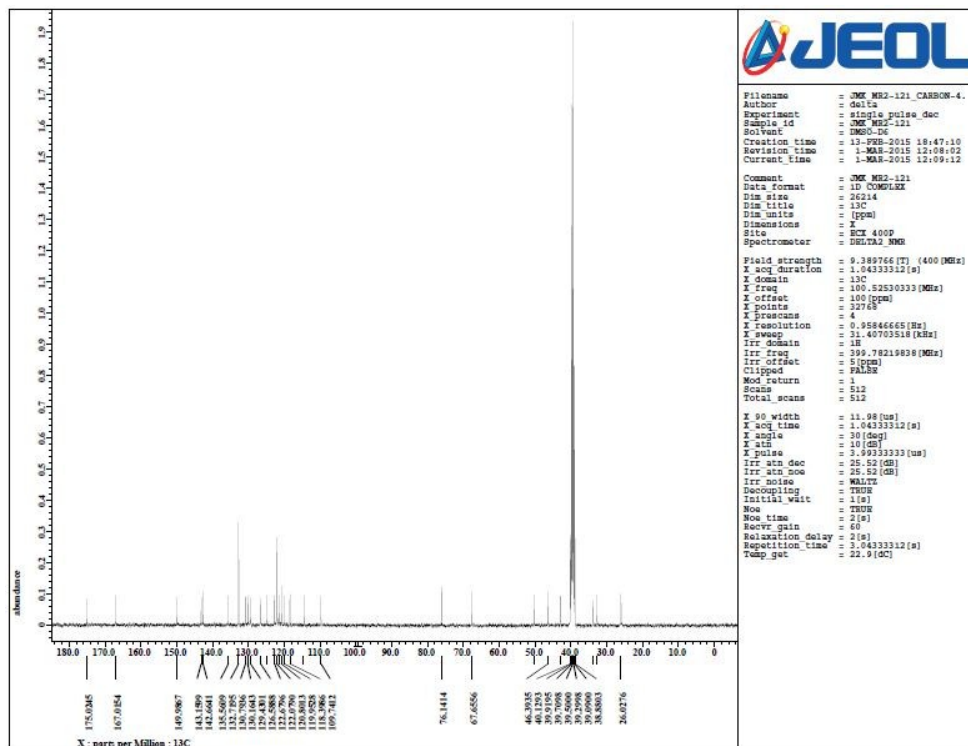

Figure 42. Mass spectrum of compound 5n.

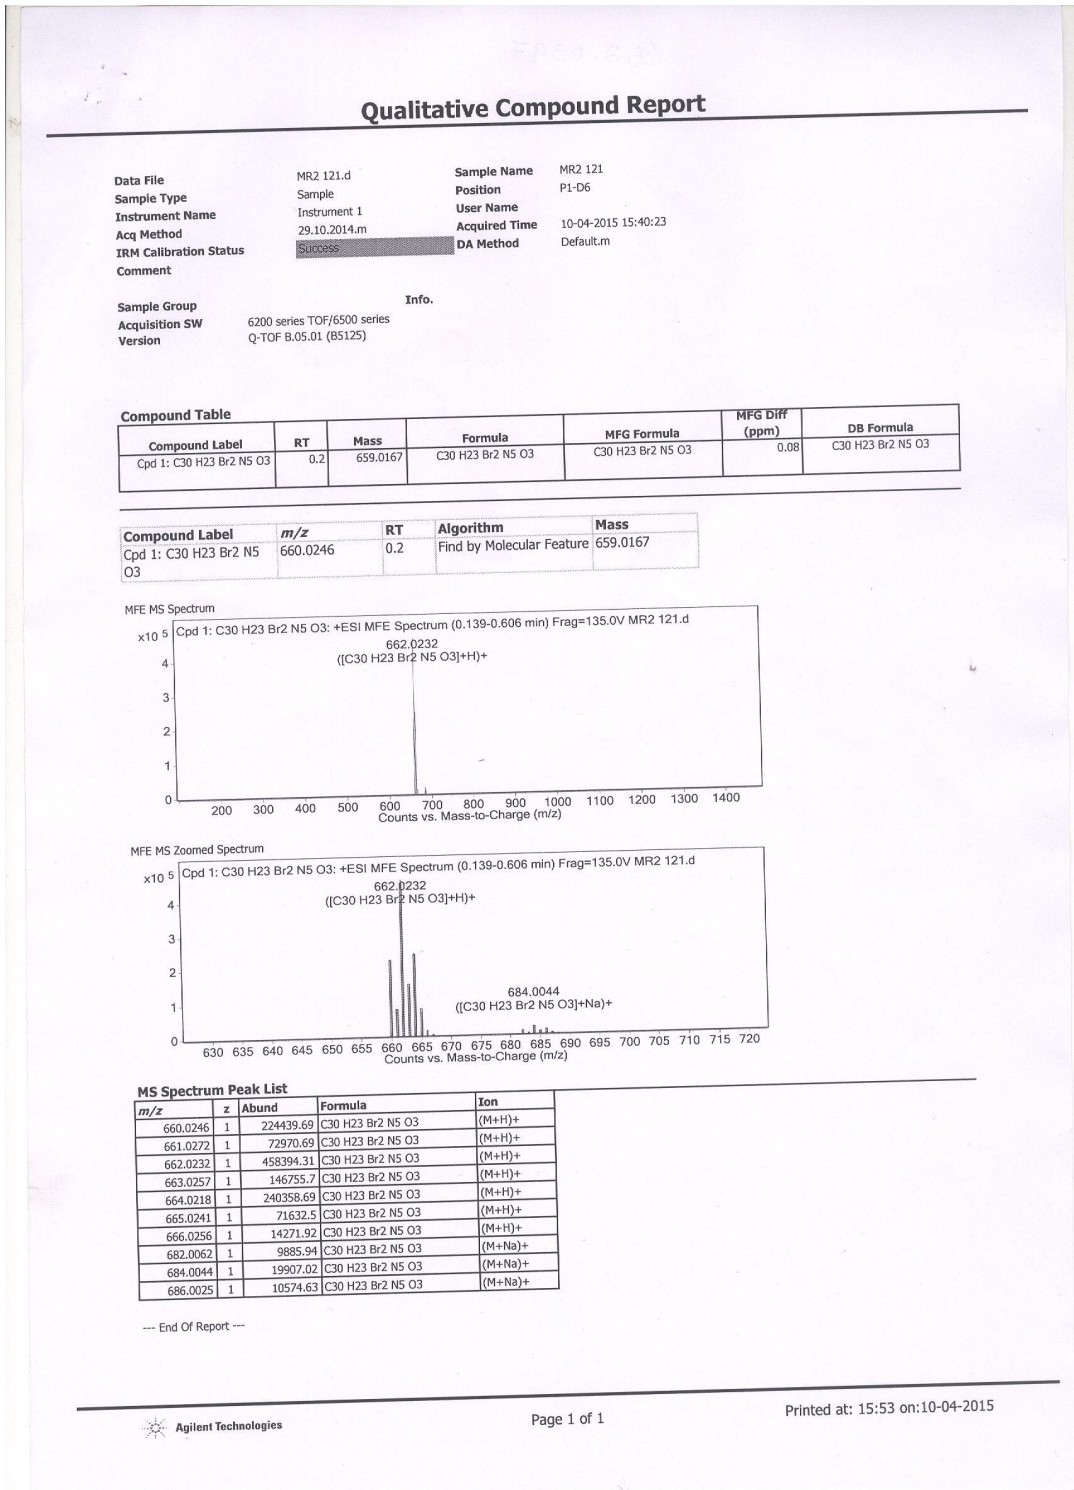

Figure 43. <sup>1</sup>H NMR spectrum of compound **5o** (400 MHz, DMSO).

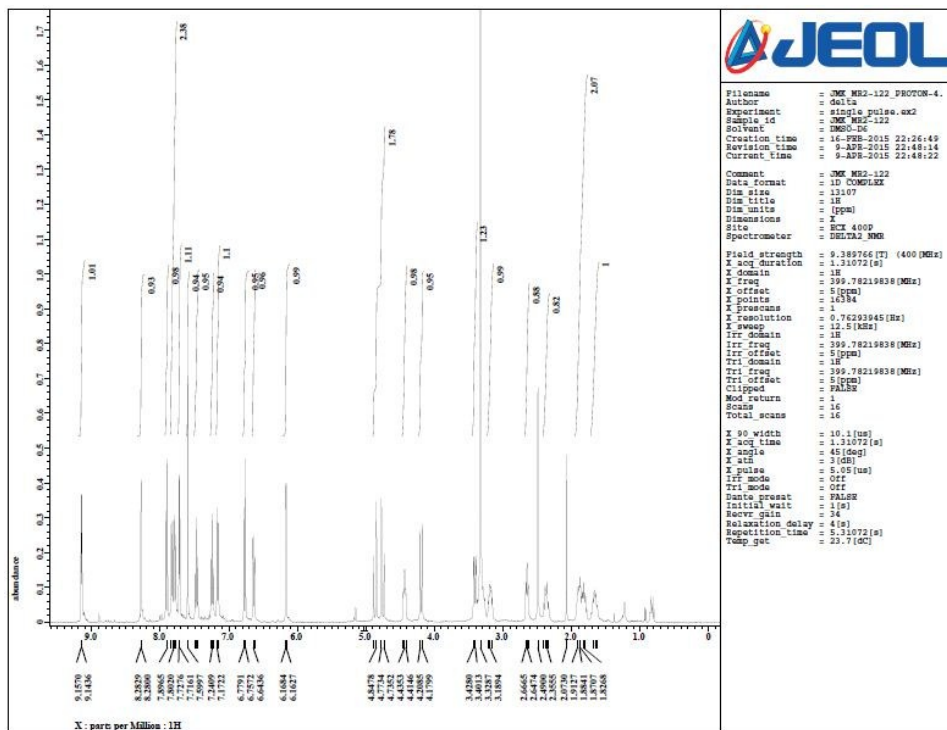

Figure 44. <sup>13</sup>C NMR spectrum of compound **5o** (100 MHz, DMSO).

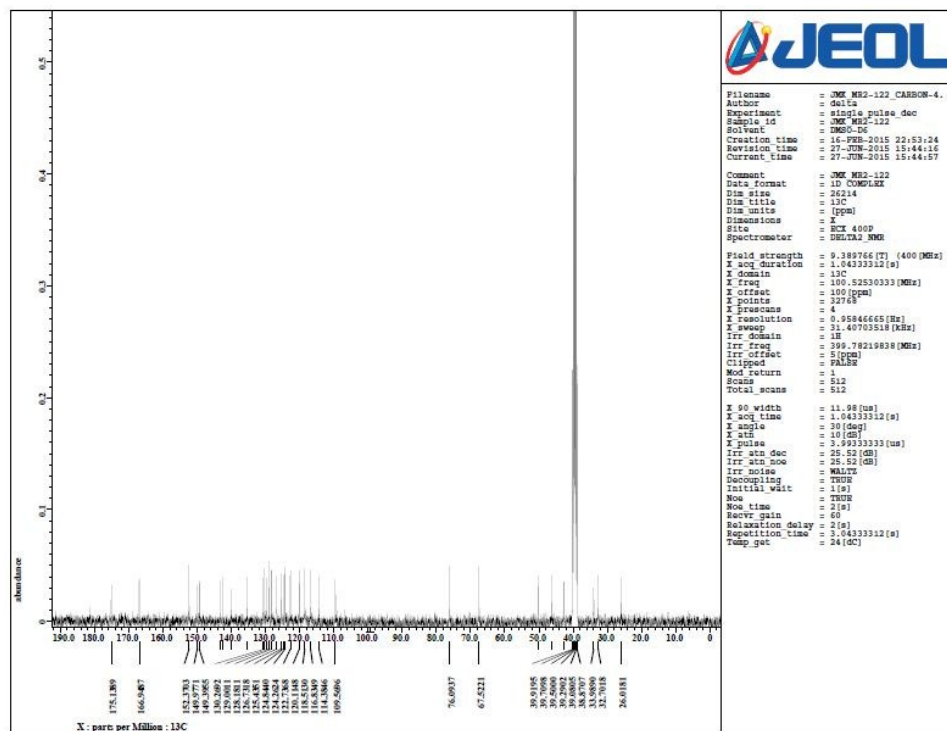

Figure 45. Mass spectrum of compound 5o.

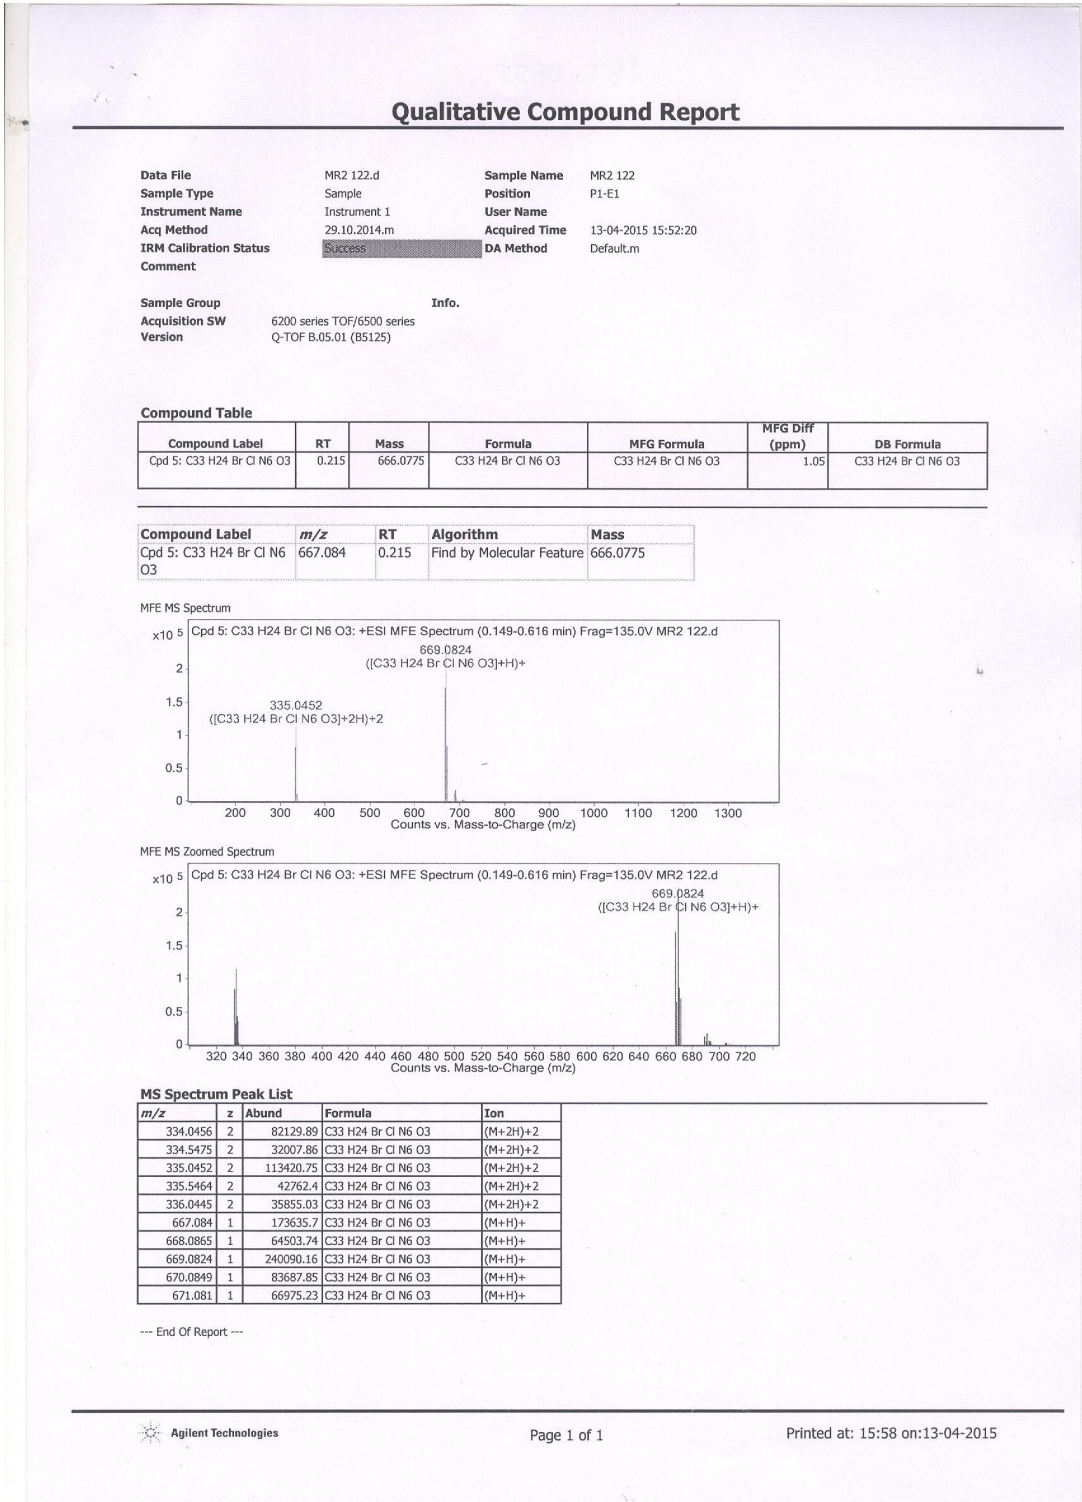

Figure 46. <sup>1</sup>H NMR spectrum of compound **5p** (400 MHz, DMSO).

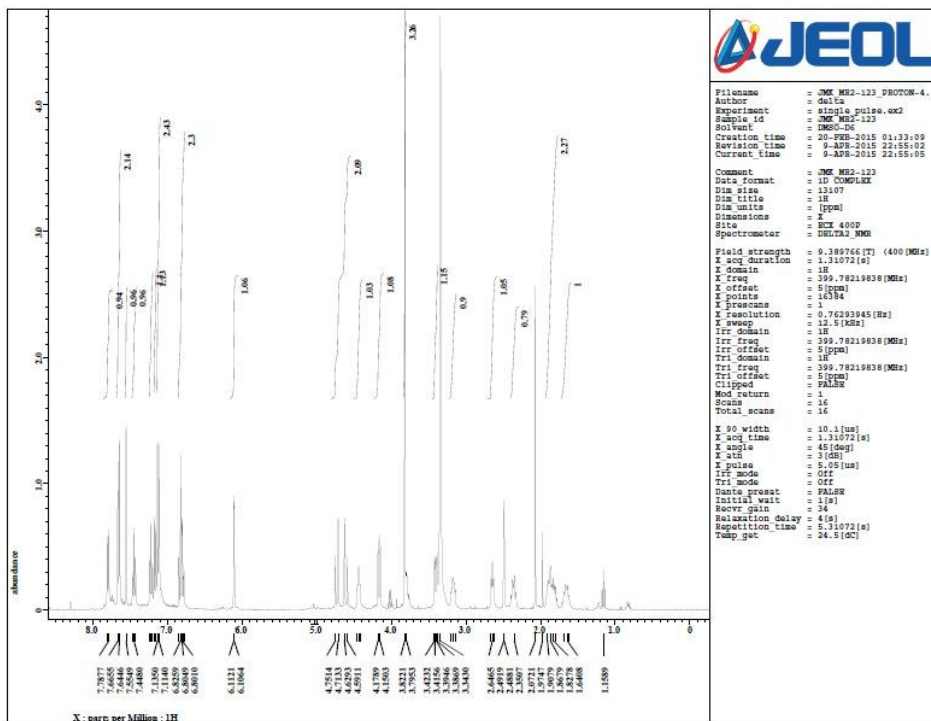

Figure 47. <sup>13</sup>C NMR spectrum of compound **5p** (100 MHz, DMSO).

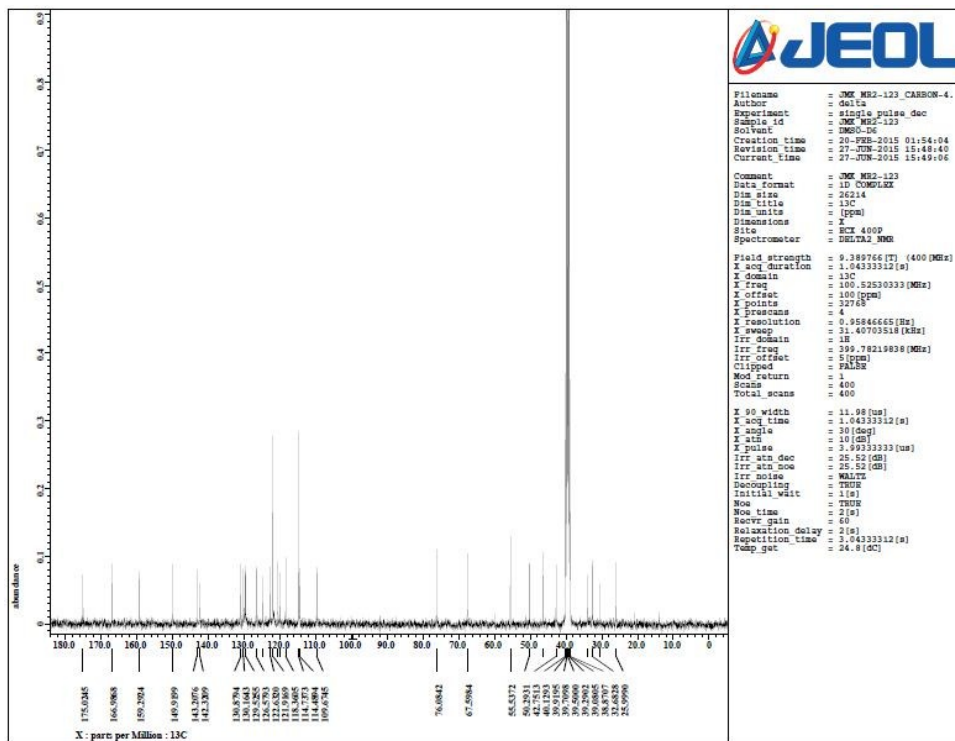



Figure 48. Mass spectrum of compound 5p.

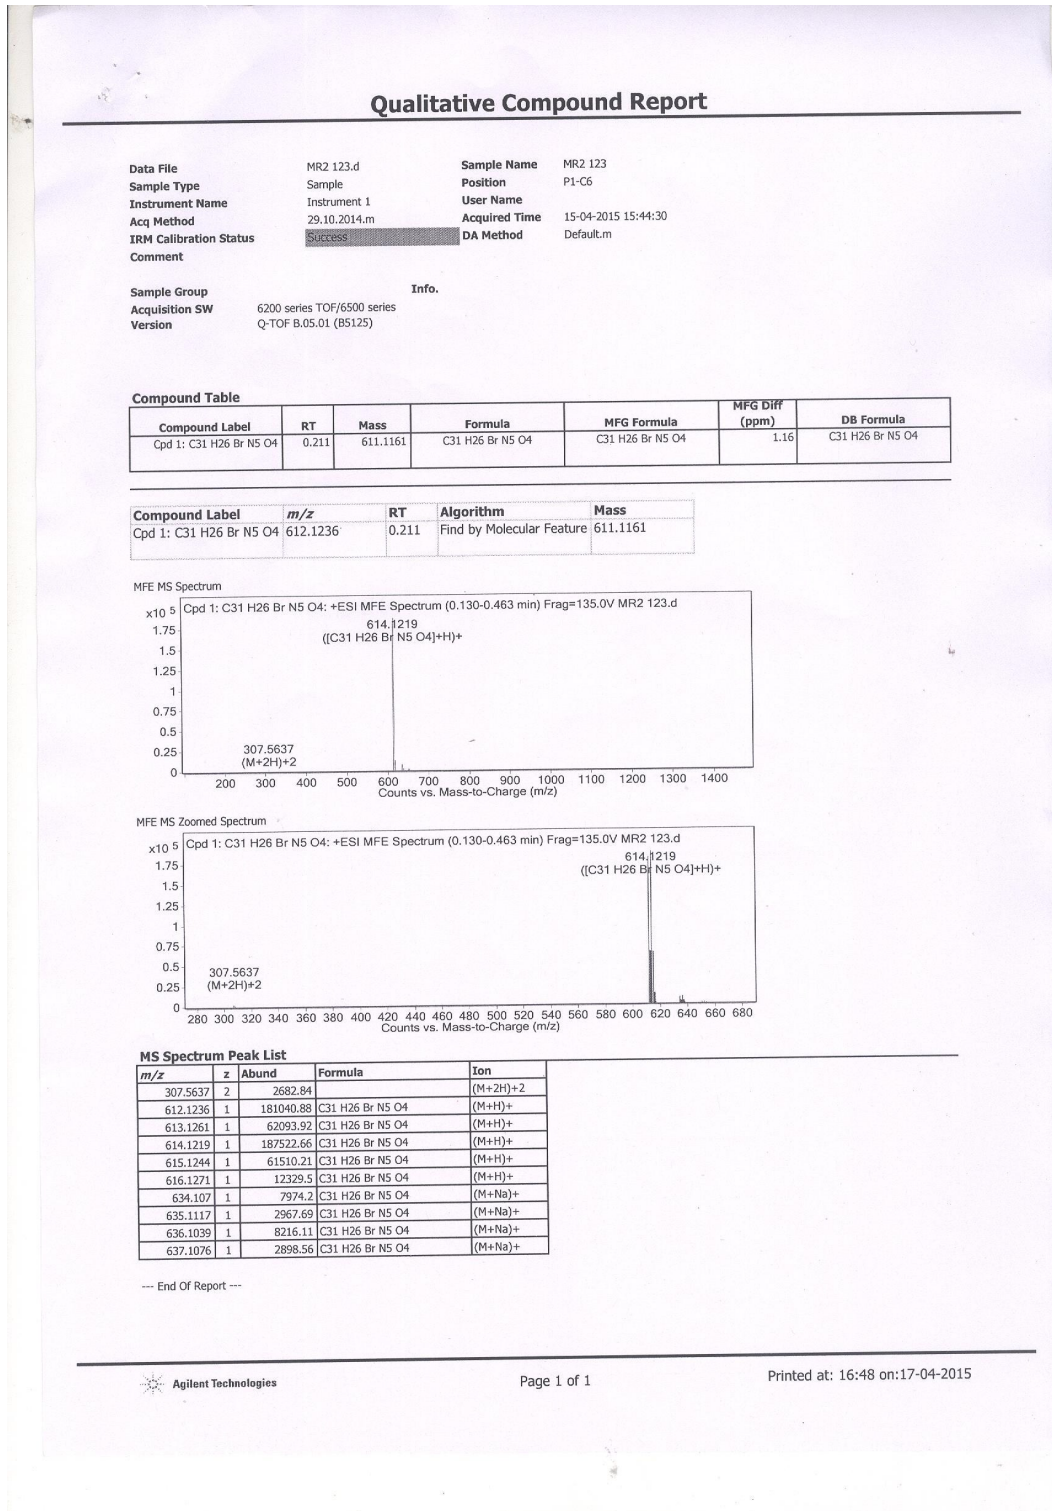

**Figure 49.** <sup>1</sup>H NMR spectrum of compound **5q** (400 MHz, DMSO).

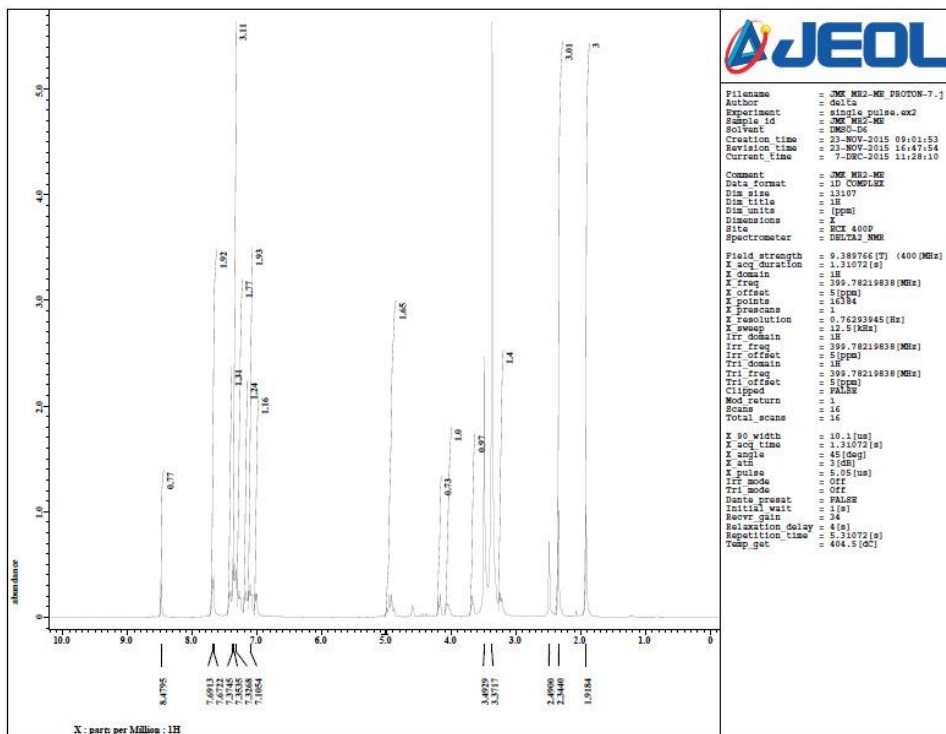

**Figure 50.** <sup>13</sup>C NMR spectrum of compound **5q** (100 MHz, DMSO).

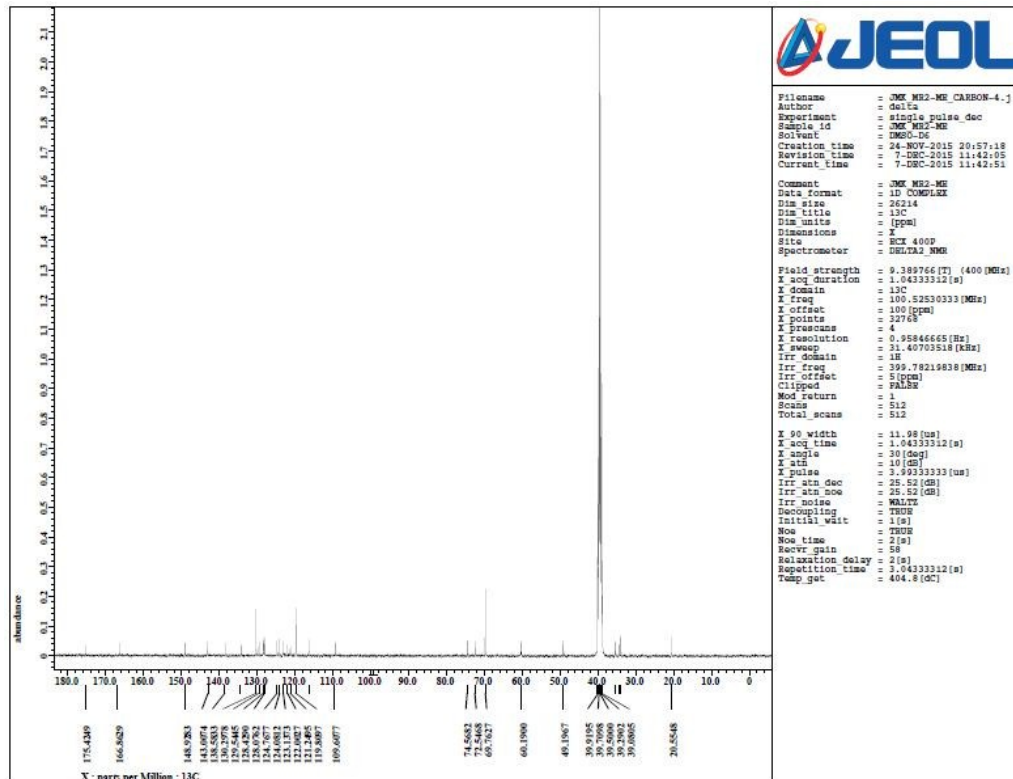

**Figure 51.** Mass spectrum of compound **5q**.

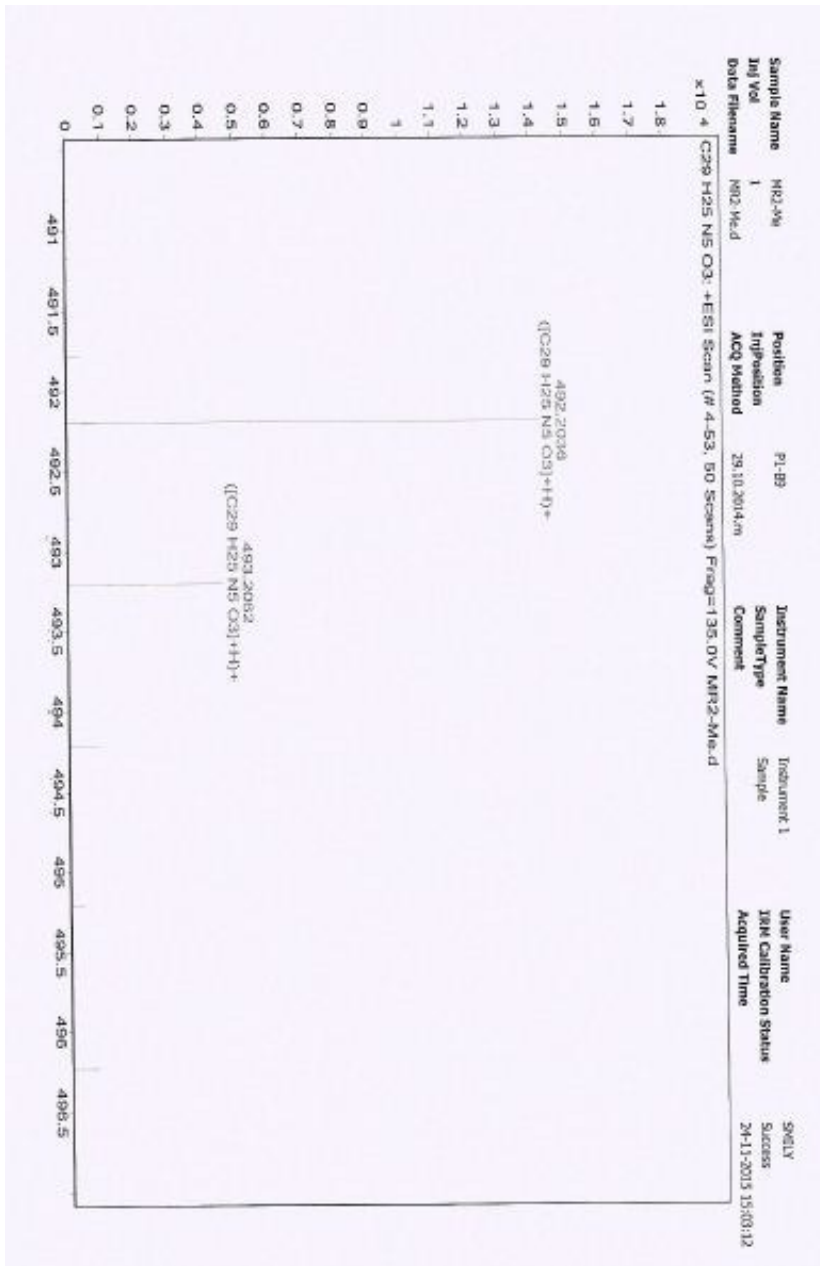

Figure 52. <sup>1</sup>H NMR spectrum of compound **5r** (400 MHz, DMSO).

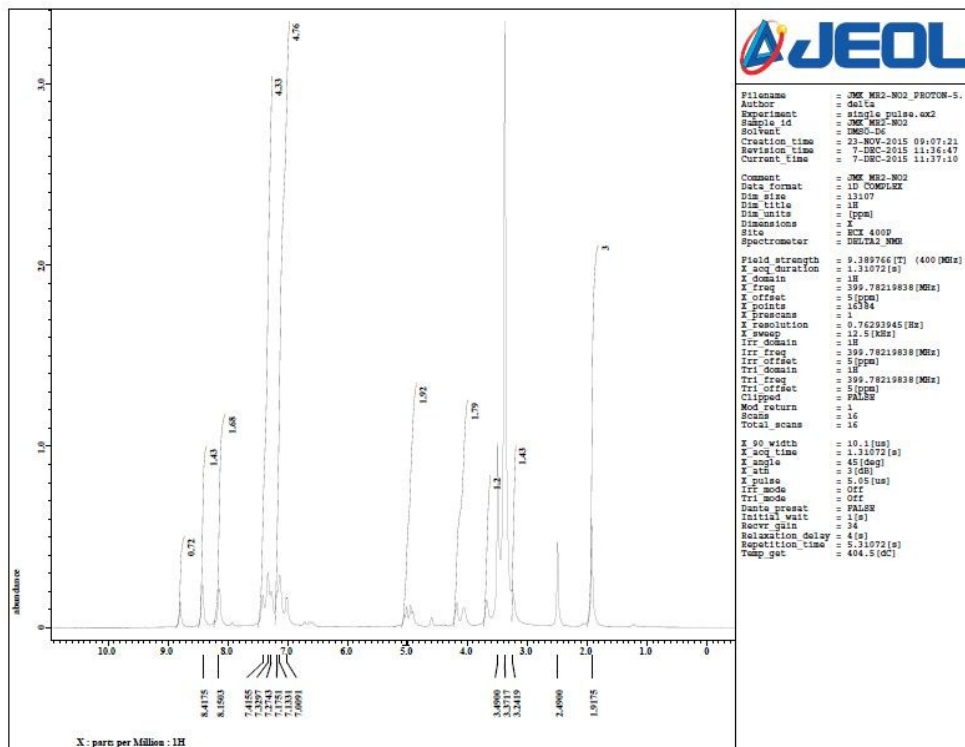

Figure 53. <sup>13</sup>C NMR spectrum of compound **5r** (100 MHz, DMSO).

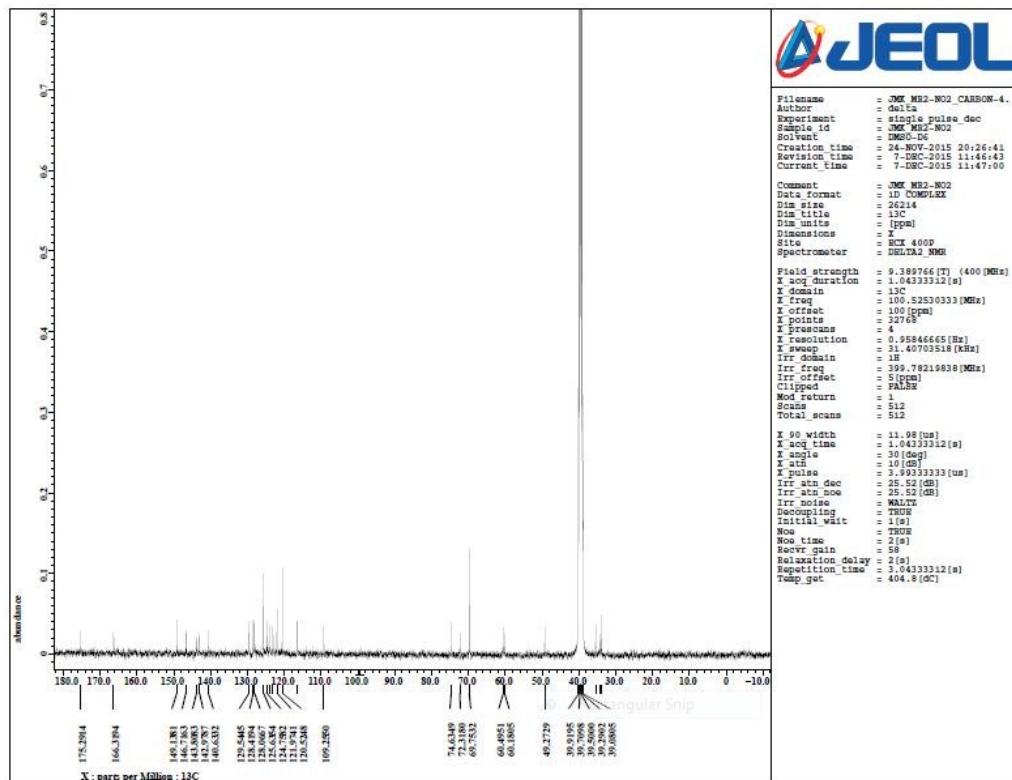

Figure 54. Mass spectrum of compound 5r.

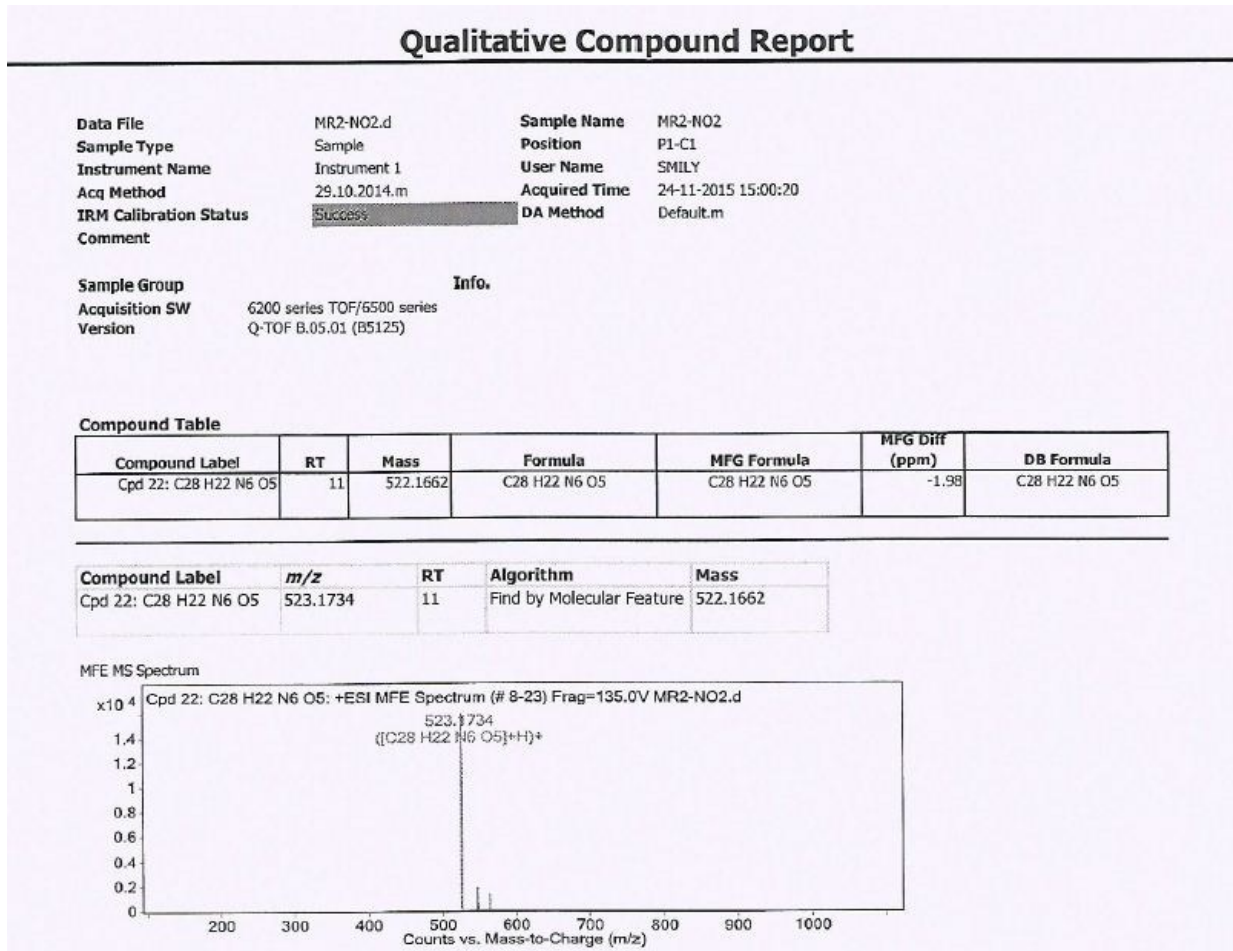

**Table 1:** Crystal data and structure refinement information for the title compound **5e**.

| Formula                           | 'C <sub>34</sub> H <sub>27</sub> Cl <sub>3</sub> N <sub>6</sub> O <sub>3</sub> '                                     |
|-----------------------------------|----------------------------------------------------------------------------------------------------------------------|
| Formula weight (g)                | 673.97                                                                                                               |
| Temperature                       | 293(2) K                                                                                                             |
| Wavelength                        | 0.71073 Å                                                                                                            |
| Crystal system, space group       | Triclinic Monoclinic, P21/n                                                                                          |
| Unit cell dimensions              | a = 17.3297(8) Å alpha = 90.00 deg.<br>b = 9.1210(6) Å beta = 92.608(4) deg.<br>c = 20.2870(10) Å gamma = 90.00 deg. |
| Volume                            | 3203.3(3) Å <sup>3</sup>                                                                                             |
| Z                                 | 4 g/cm <sup>3</sup>                                                                                                  |
| Absorption coefficient            | 0.332 mm <sup>-1</sup>                                                                                               |
| F(000)                            | 1224                                                                                                                 |
| Crystal size                      | 0.04 X 0.03 X 0.01 mm                                                                                                |
| Theta range for data collection   | 3.17 to 21.36 deg                                                                                                    |
| Limiting indices                  | -19<=h<=20, -9<=k<=10, -24<=l<=19                                                                                    |
| Completeness to theta             | 99.9%                                                                                                                |
| Absorption correction             | Semi-empirical from equivalents                                                                                      |
| Max. and min. transmission        | 1.00000 and 0.86823                                                                                                  |
| Refinement method                 | Full-matrix least-squares on F <sup>2</sup>                                                                          |
| Data / restraints / parameters    | 5632/ 0 / 411                                                                                                        |
| Goodness-of-fit on F <sup>2</sup> | 0.955                                                                                                                |
| Final R indices [I>2sigma(I)]     | R1 = 0.1009, wR2 = 0.2792                                                                                            |
| R indices (all data)              | R1 = 0.1793, wR2 = 0.3310                                                                                            |
| Largest diff. peak and hole       | 0.60 and -0.54 e.Å <sup>-3</sup>                                                                                     |

The crystal structure shows that spiro carbon of *N*-propargyl isatin and pyrrolizine ring deviates by an angle 110.26° (Fig. 55a). The compound reveals two types of interactions, namely,

intermolecular and intramolecular hydrogen bonding (Table 2). The intermolecular H-bonding stabilized the molecule by C4-H4...Cl2 and C20-H20A...N6 and C16-H16...N2 with a distance of 2.912, 2.594 and 2.700 Å, respectively (Fig. 55b). The structure also involves intramolecular hydrogen bonding interaction between the C7-H7...O1, C24-H24...C22, C1-H1...C19, C17-H17...C20 and C20-H20B...O3 with a distance of 2.683, 2.822, 2.880, 2.865 and 2.563 Å respectively (Fig. 55c).

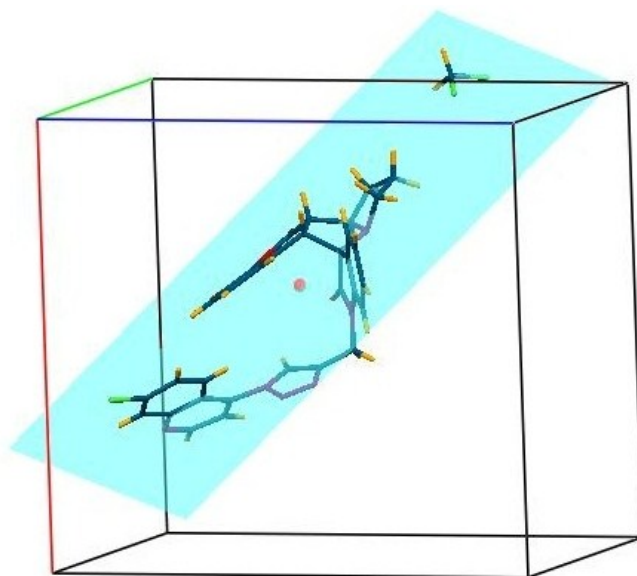

(a)

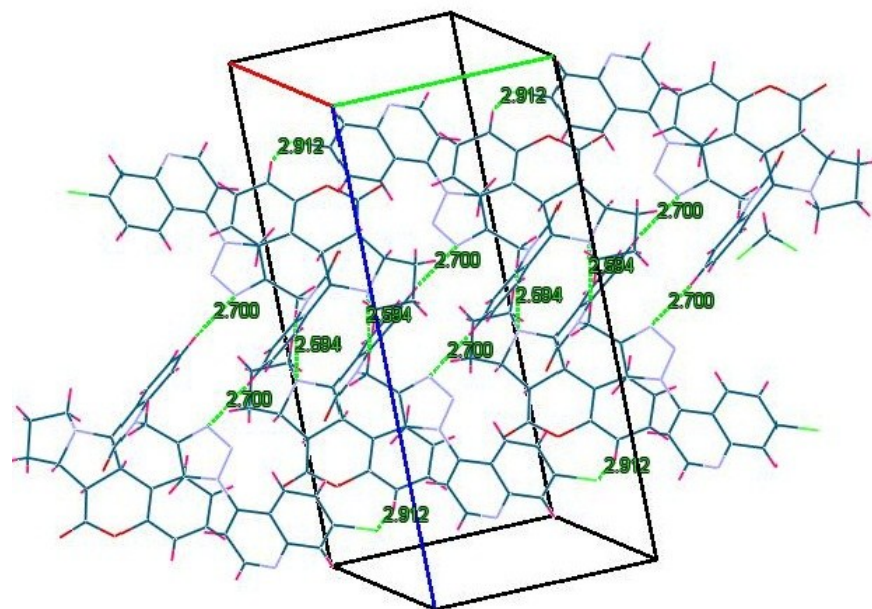

(b)

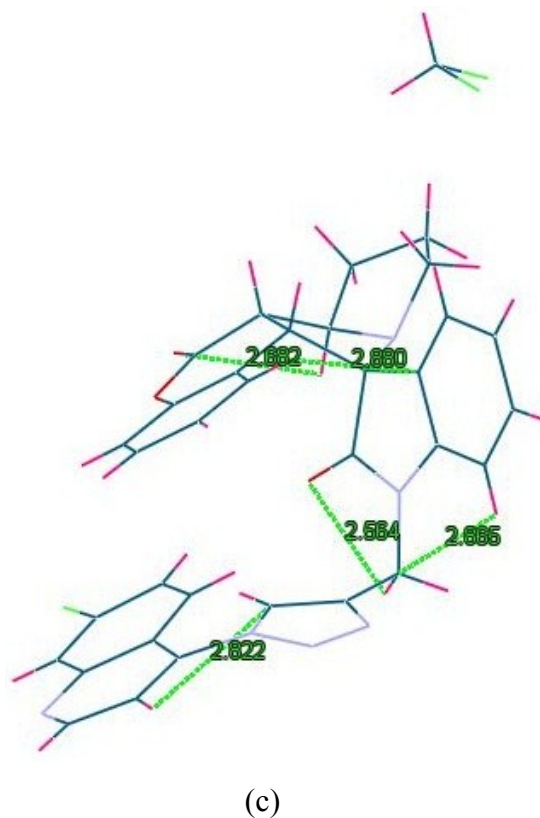

**Figure 55:** (a) View of crystal **5e** shown along b axis; (b) Intermolecular hydrogen bonding interactions in the crystal of **5e**; (c) Intramolecular hydrogen bonding in the crystal **5e**.

**Table 2:** Intermolecular and intramolecular hydrogen bonding geometries of **5e**

| D-H...A                    | D-H (Å) | H...A (Å) | D...A (Å)  | D-H...A (°) |
|----------------------------|---------|-----------|------------|-------------|
| C7-H7...O3                 | 0.98    | 2.52      | 2.9946 (2) | 109         |
| C20-H20A...N6 <sup>i</sup> | 0.97    | 2.59      | 3.5498 (2) | 171         |
| C26-H26...N3 <sup>ii</sup> | 0.93    | 2.56      | 3.0629 (2) | 115         |
| C34-H34A...O1              | 0.97    | 2.59      | 3.5393 (2) | 166         |

Note: D, Donor; A, Acceptor; Symmetry code: i)  $-x, 1-y, -z$ ; ii)  $1/2-x, -1/2+y, 1/2-z$ .
